# Supplementary material for: Mechanism and origin of cyclization selectivity for Ru(ii)-catalyzed gem-hydrogenation of 1,3-enynes: a DFT study
Source: Royal Society of Chemistry journal article supplement (doi:10.1039/d4cy00261j), 2024-01-01
Supplement: d4cy00261j1.pdf [file d4cy00261j1.pdf]

## Supporting Information

### Mechanism and Origin of Cyclization Selectivity for Ru(II)-Catalyzed *gem*- Hydrogenation of 1,3-Enynes: A DFT Study

Shuiqing Liu,<sup>a</sup> Baoping Ling,<sup>a</sup> Siwei Bi\*<sup>a</sup> and Rongyue Wang\*<sup>b</sup>

<sup>a</sup> School of Chemistry and Chemical Engineering, Qufu Normal University, 57 Jingxuan West Road, Qufu, Shandong, 273165, People's Republic of China

<sup>b</sup> GRINM (Guangdong) Institute for Advanced Materials and Technology, Foshan, Guangdong, 528000, People's Republic of China

E-mail: [siweibi@126.com](mailto:siweibi@126.com) (S. Bi), [wangrongyue@grinm.com](mailto:wangrongyue@grinm.com) (R. Wang)

## Table of Contents

|                                                                                                                                                |     |
|------------------------------------------------------------------------------------------------------------------------------------------------|-----|
| Benchmark study for the different computational methods.....                                                                                   | S3  |
| <b>Fig. S2</b> Scan of $r(\text{Ru}\cdots\text{C}_{\text{sp}2})$ vs electronic energy E from complex <b>A7</b> to intermediate <b>A8</b> ..... | S4  |
| <b>Fig. S3</b> Scan of $r(\text{Ru}\cdots\text{C}_{\text{sp}2})$ vs electronic energy E from complex <b>B7</b> to intermediate <b>B8</b> ..... | S5  |
| <b>Fig. S4</b> Gibbs free energy profile for other possible pathways from <b>A5</b> to <b>A8</b> in Reaction A .....                           | S6  |
| <b>Fig. S5</b> Gibbs free energy profile for other possible pathways from <b>B5</b> to <b>B8</b> in Reaction B.....                            | S7  |
| <b>Fig. S6</b> Calculated the $\text{Ru}\cdots\text{H}^1$ distances in <b>A5</b> and <b>B5</b> using B3LYP and B3LYP-D3 methods.....           | S8  |
| <b>Table S1</b> Corrected solution-phase Gibbs free energies in DCE of all species .....                                                       | S9  |
| <b>Cartesian coordinates of all calculated species (in angstrom)</b> .....                                                                     | S10 |

### Benchmark study for the different computational methods

- █ PW6B95-D3BJ/def2-TZVPP//PW6B95-D3BJ/def2-SVP
- █ wB97XD-ultrafine/def2-TZVPP//wB97XD-ultrafine/def2-SVP
- █ M06-ultrafine/def2-TZVPP//M06-ultrafine/def2-SVP
- █ M06-D3/6-311++G(d,p)-SDD//B3LYP-D3/6-31G(d,p)-LANL2DZ
- █ M06/6-311++G(d,p)-SDD//B3LYP/6-31G(d,p)-LANL2DZ

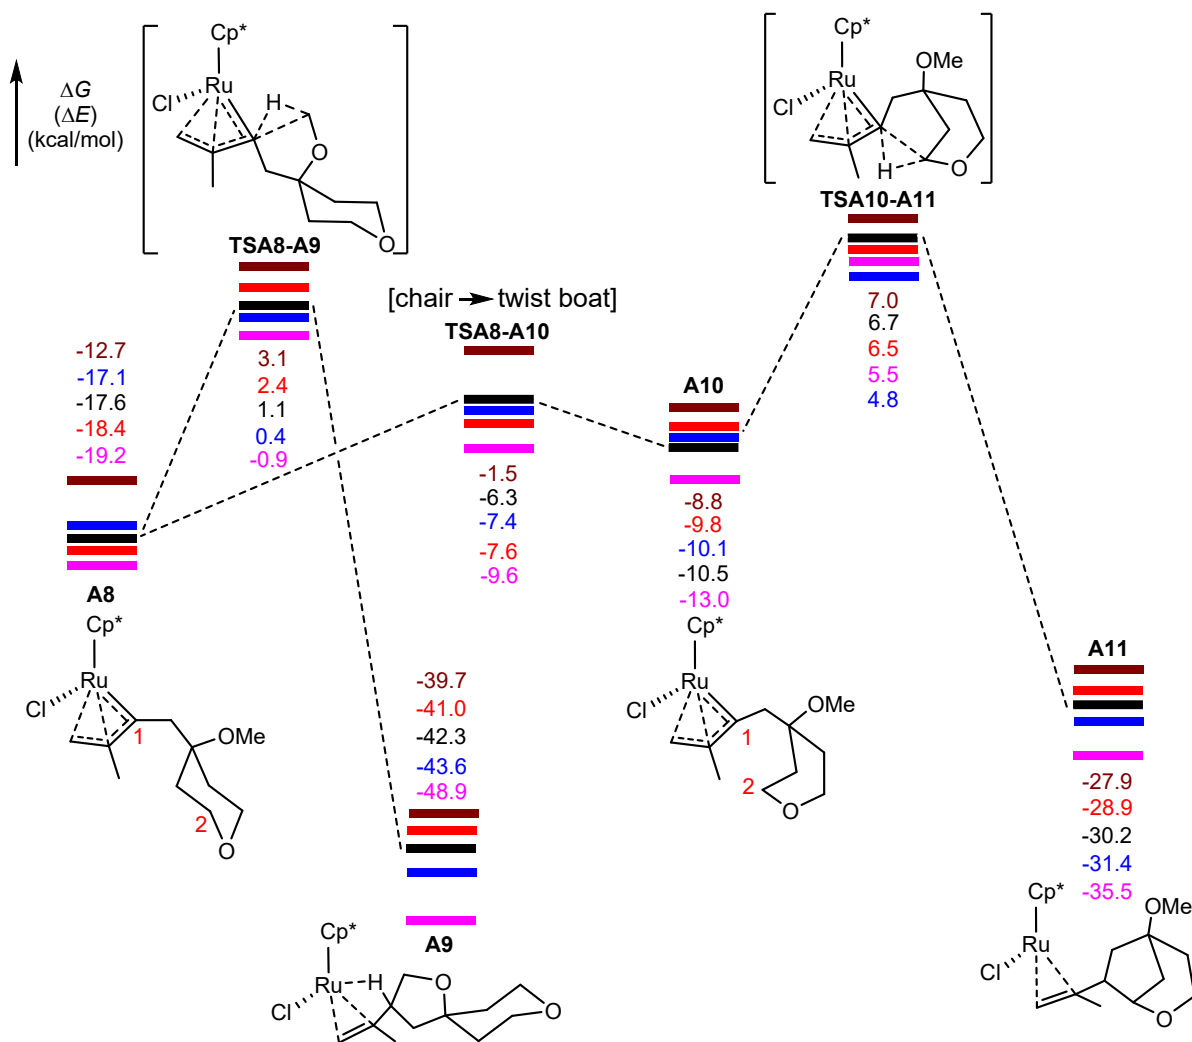

**Figure S1.** Calculated Gibbs free energy profile for cyclization processes in model reaction A using different computational methods. Full optimizations in dichloroethane solvent have been performed with SMD model.

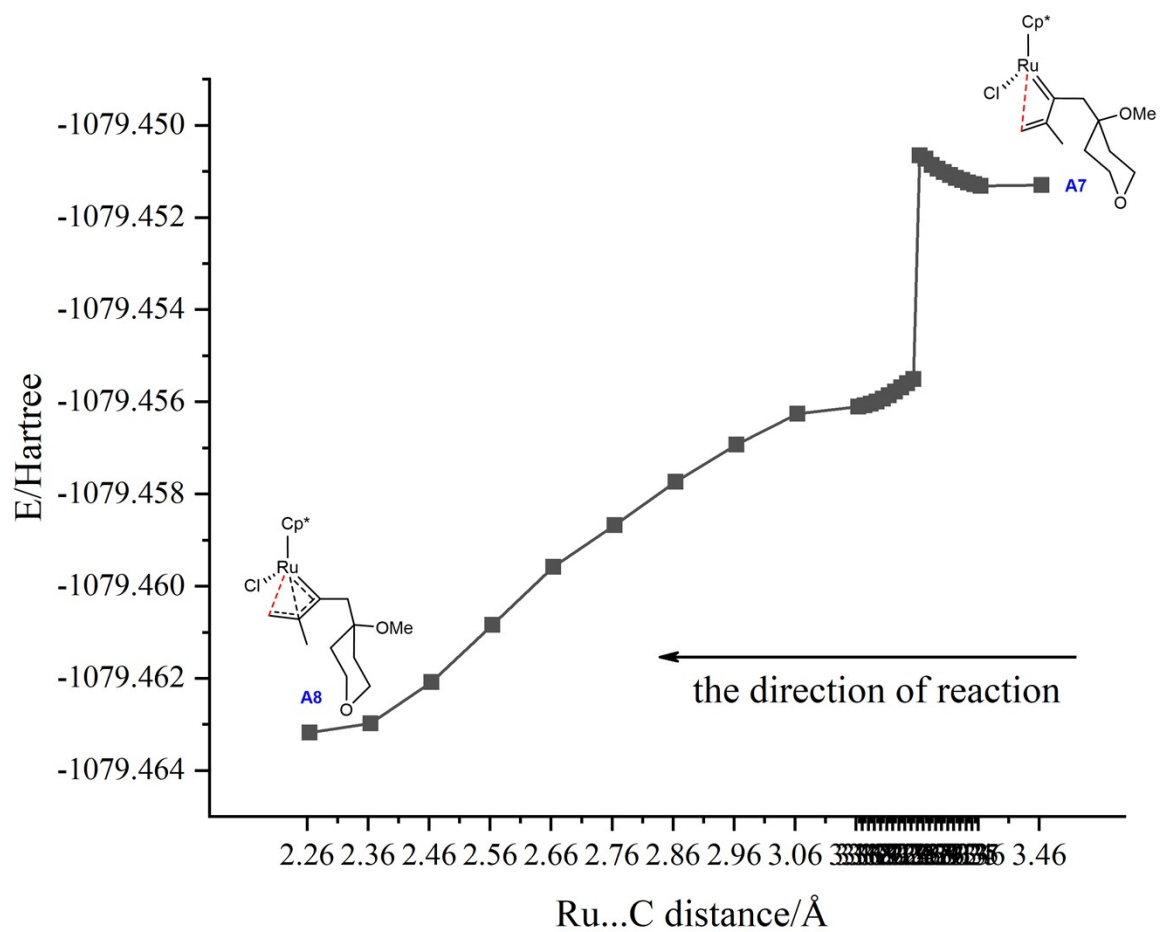

**Figure S2.** Scan of  $r(\text{Ru}\cdots\text{C}_{\text{sp}2})$  vs electronic energy  $E$  from complex **A7** to intermediate **A8** in Reaction

A.

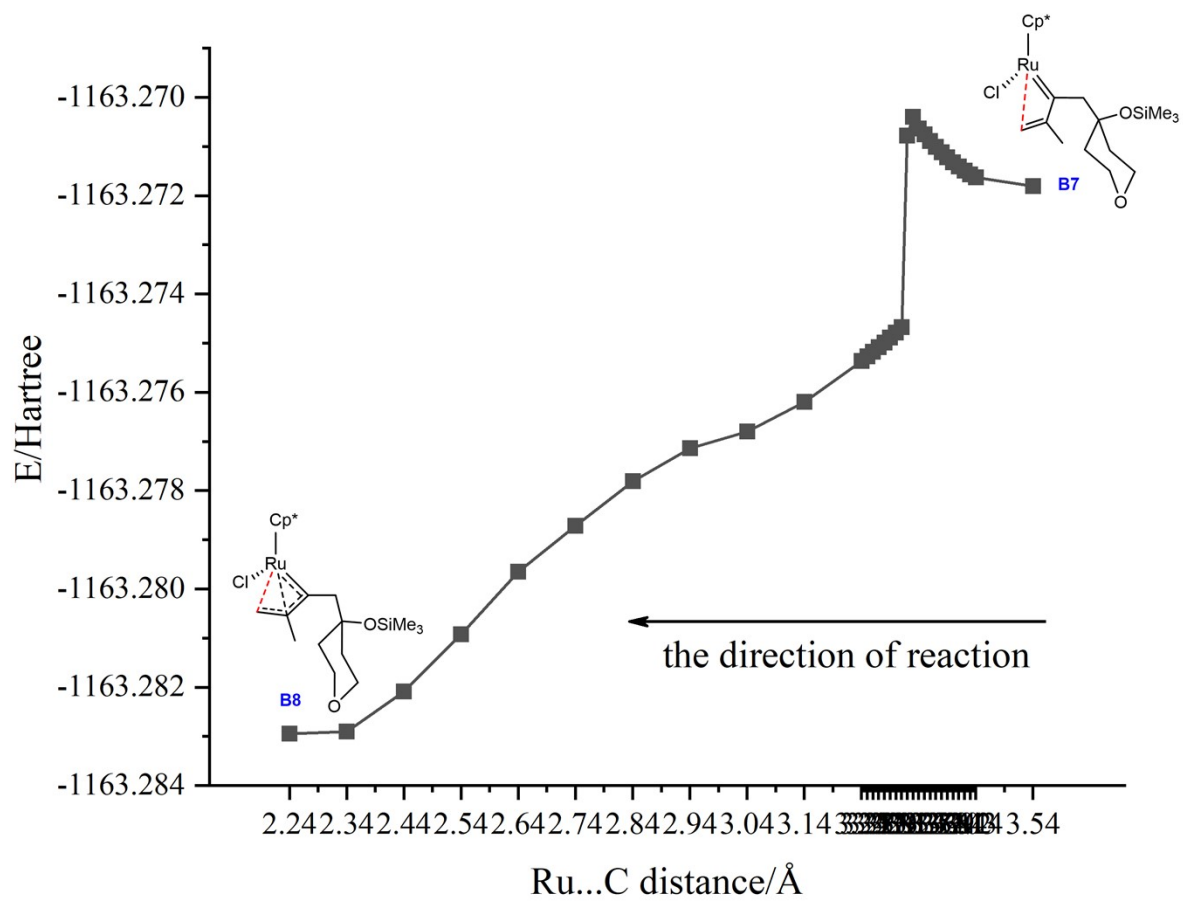

**Figure S3.** Scan of  $r(\text{Ru}\cdots\text{C}_{\text{sp}^2})$  vs electronic energy  $E$  from complex **B7** to intermediate **B8** in Reaction

B.

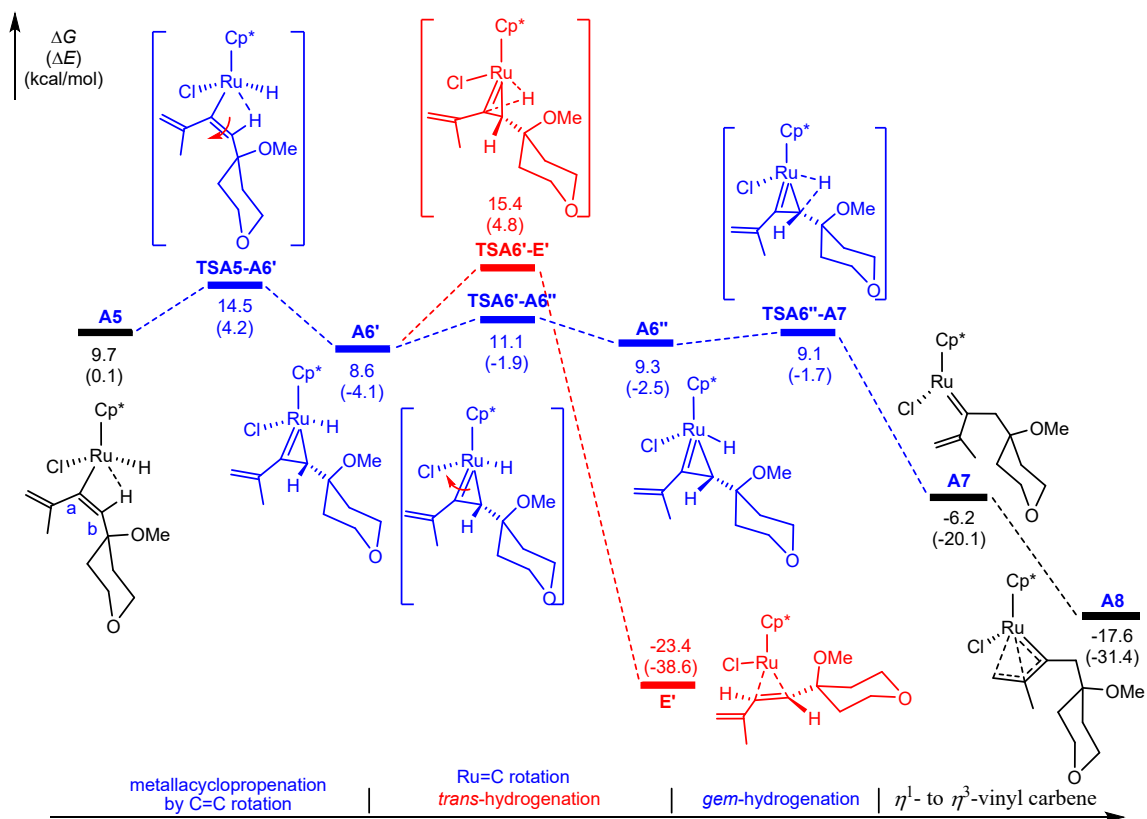

**Figure S4.** Calculated Gibbs energy profiles for *gem*-hydrogenation and *trans*-hydrogenation of the substrate 1,3-enyne from another metallacyclopropene intermediate **A6'** mediated by  $[\text{Cp}^*\text{RuCl}]_4$  in Reaction A.

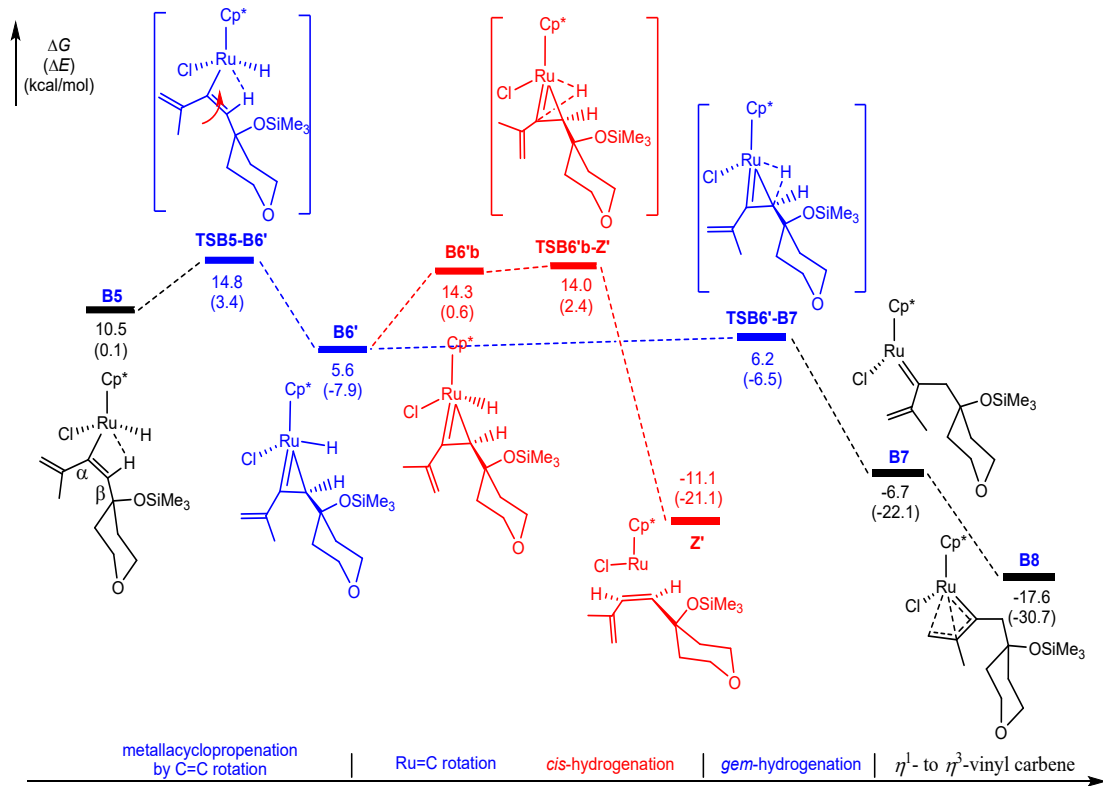

**Figure S5.** Calculated Gibbs energy profiles for *gem*-hydrogenation and *cis*-hydrogenation of the substrate 1,3-ene from another metallacyclopropane intermediate **B6'** mediated by  $[\text{Cp}^*\text{RuCl}]_4$  in Reaction B.

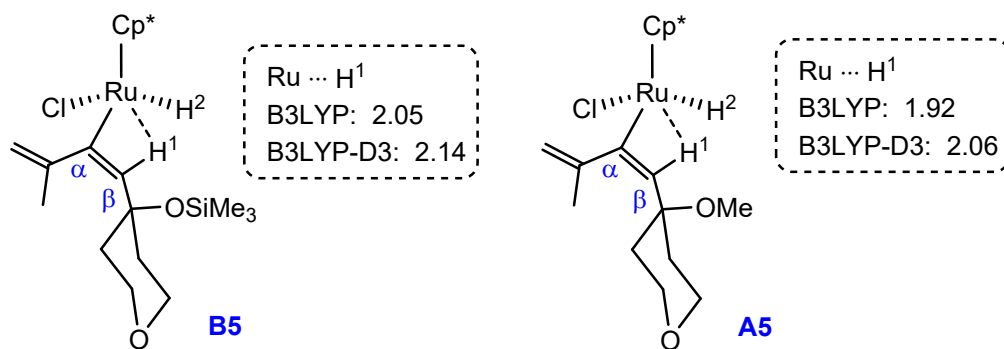

**Figure S6.** Calculated the Ru...H<sup>1</sup> distances in **A5** and **B5** using B3LYP and B3LYP-D3 methods, respectively.



**Table S1. Calculated thermodynamic corrections solution-phase Gibbs free energies in DCE of all the intermediates and transition states (in Hartree).**

| species              | $\Delta G_{\text{sol}}$ | species          | $\Delta G_{\text{sol}}$ |
|----------------------|-------------------------|------------------|-------------------------|
| <b>H<sub>2</sub></b> | -1.171212               | <b>B1</b>        | -1892.821194            |
| <b>A1</b>            | -1523.556811            | <b>B2</b>        | -1892.821222            |
| <b>A2</b>            | -1523.556745            | <b>B3</b>        | -1893.982529            |
| <b>A3</b>            | -1524.719068            | <b>TSB3-B4</b>   | -1893.967783            |
| <b>TSA3-A4</b>       | -1524.709537            | <b>B4</b>        | -1893.967643            |
| <b>A4</b>            | -1524.707847            | <b>TSB4-B5</b>   | -1893.96758             |
| <b>TSA4-A5</b>       | -1524.707109            | <b>B5</b>        | -1893.975697            |
| <b>A5</b>            | -1524.712529            | <b>TSB5-B6</b>   | -1893.970488            |
| <b>TSA5-A6</b>       | -1524.706311            | <b>B6</b>        | -1893.982923            |
| <b>A6</b>            | -1524.718391            | <b>TSB6-B7</b>   | -1893.980665            |
| <b>TSA6-A7</b>       | -1524.716971            | <b>B7</b>        | -1894.003127            |
| <b>A7</b>            | -1524.737863            | <b>B8</b>        | -1894.020465            |
| <b>A8</b>            | -1524.756023            | <b>TSB8-B9</b>   | -1893.969892            |
| <b>TSA8-A9</b>       | -1524.726274            | <b>B9</b>        | -1894.045234            |
| <b>A9</b>            | -1524.795473            | <b>TSB8-B10</b>  | -1894.001413            |
| <b>TSA8-A10</b>      | -1524.737989            | <b>B10</b>       | -1894.012906            |
| <b>A10</b>           | -1524.744759            | <b>TSB10-B11</b> | -1893.980259            |
| <b>TSA10-A11</b>     | -1524.717287            | <b>B11</b>       | -1894.041168            |
| <b>A11</b>           | -1524.776201            | <b>TSB11-B12</b> | -1894.035126            |
| <b>TSA11-A12</b>     | -1524.769662            | <b>B12</b>       | -1894.047646            |
| <b>A12</b>           | -1524.78326             | <b>B6b</b>       | -1893.97744             |
| <b>A6a</b>           | -1524.708872            | <b>TSB6b-E</b>   | -1893.968335            |
| <b>TS6a-Z</b>        | -1524.710295            | <b>E</b>         | -1894.033895            |
| <b>Z</b>             | -1524.749511            | <b>B8'</b>       | -1895.151728            |
| <b>A8'</b>           | -1525.898182            | <b>TSB5-B6'</b>  | -1893.968894            |
| <b>TSA5-A6'</b>      | -1524.704963            | <b>B6'</b>       | -1893.983447            |
| <b>A6'</b>           | -1524.714245            | <b>TSB6'-B7</b>  | -1893.982596            |
| <b>TSA6'-A6''</b>    | -1524.710277            | <b>B6'b</b>      | -1893.969582            |
| <b>A6''</b>          | -1524.713237            | <b>TSB6'b-Z'</b> | -1893.970168            |
| <b>TSA6''-A7</b>     | -1524.713508            | <b>Z'</b>        | -1894.010052            |
| <b>TSA6'-E'</b>      | -1524.703536            |                  |                         |
| <b>E'</b>            | -1524.765338            |                  |                         |

**Cartesian coordinates of all calculated species  
(in angstrom)**

**H<sub>2</sub>**

|   |            |            |             |
|---|------------|------------|-------------|
| H | 0.00000000 | 0.00000000 | 0.37169200  |
| H | 0.00000000 | 0.00000000 | -0.37169200 |

**A1**

|   |             |             |             |
|---|-------------|-------------|-------------|
| C | -1.36413600 | -1.31866600 | -2.24057200 |
| C | -0.56259000 | -2.01104100 | -1.30704900 |
| C | -0.92455000 | -3.37094300 | -0.75610300 |
| H | -0.48958900 | -4.14689200 | -1.39888700 |
| H | -0.53891900 | -3.52297700 | 0.25420000  |
| H | -2.00819000 | -3.51323200 | -0.75507400 |
| C | 0.66709800  | -1.41303100 | -0.92939200 |
| C | 1.48020800  | -0.64030200 | -0.40790400 |
| C | 2.80911500  | -0.12204300 | 0.03228800  |
| O | 2.69096900  | 0.99515200  | 0.91850100  |
| C | 2.34549900  | 2.25692300  | 0.34665100  |
| H | 2.13923700  | 2.92129700  | 1.19017000  |
| H | 3.17465400  | 2.68838900  | -0.22875500 |
| H | 1.45879800  | 2.19473000  | -0.29290500 |
| C | 3.70540500  | 0.17554600  | -1.19724500 |
| C | 5.14138000  | 0.48080500  | -0.76496900 |
| C | 4.95290600  | -0.82228300 | 1.19006000  |
| C | 3.50689200  | -1.21495700 | 0.88229700  |
| H | 5.78240700  | 0.59943400  | -1.64385200 |
| H | 3.70518000  | -0.71155500 | -1.83889500 |
| H | 3.29564000  | 1.00022900  | -1.78752700 |
| H | 5.46122800  | -1.63579000 | 1.71701200  |
| H | 4.97217900  | 0.06893300  | 1.83479200  |
| H | 3.49421300  | -2.15818200 | 0.32755900  |
| H | 2.94743200  | -1.35688500 | 1.81264300  |
| H | 5.18029900  | 1.41823800  | -0.18852800 |
| O | 5.70012700  | -0.58515300 | -0.00040400 |
| C | -1.40312700 | 0.41093100  | 1.86192100  |
| C | -2.13411300 | -0.77805400 | 1.51512400  |
| C | -3.10247100 | -0.42132300 | 0.50635600  |
| C | -2.93955100 | 0.97542000  | 0.20303600  |
| C | -1.87526300 | 1.48799100  | 1.05269200  |
| C | -1.46682600 | 2.92635600  | 1.15244800  |
| H | -1.34871400 | 3.37208300  | 0.16151400  |

|    |             |             |             |
|----|-------------|-------------|-------------|
| H  | -2.22682800 | 3.50375000  | 1.69526400  |
| H  | -0.52163400 | 3.03623700  | 1.68972500  |
| C  | -0.34952000 | 0.50446300  | 2.92386300  |
| H  | 0.44841100  | 1.19549100  | 2.64427000  |
| H  | -0.79346000 | 0.86338000  | 3.86187800  |
| H  | 0.10328100  | -0.46914300 | 3.12592800  |
| C  | -3.82501200 | 1.80806300  | -0.67332400 |
| H  | -3.26066500 | 2.60873600  | -1.15639700 |
| H  | -4.29487500 | 1.20684600  | -1.45639900 |
| H  | -4.62668000 | 2.26889500  | -0.08042400 |
| C  | -4.19109500 | -1.30586800 | -0.02400200 |
| H  | -5.09055000 | -1.20172500 | 0.59721700  |
| H  | -4.46702800 | -1.03867300 | -1.04706800 |
| H  | -3.90657300 | -2.36071200 | -0.01061200 |
| C  | -2.05161800 | -2.08669400 | 2.24460100  |
| H  | -1.01962500 | -2.35547800 | 2.48763600  |
| H  | -2.60368200 | -2.02601400 | 3.19184900  |
| H  | -2.48785100 | -2.90277000 | 1.66571700  |
| Ru | -1.11713700 | -0.05769900 | -0.38631800 |
| Cl | -0.45298500 | 1.70563200  | -2.05395100 |
| H  | -0.92770400 | -0.66773100 | -2.98776700 |
| H  | -2.33617900 | -1.74364400 | -2.47857100 |

**A2**

|   |             |             |             |
|---|-------------|-------------|-------------|
| C | -0.17540000 | 3.42502200  | -1.42513300 |
| H | -0.23480000 | 4.50554800  | -1.52525800 |
| H | 0.07044700  | 2.85408900  | -2.31504800 |
| C | -0.43400500 | 2.82598900  | -0.25009000 |
| C | -0.79592700 | 3.60602600  | 0.99459200  |
| H | -1.83721600 | 3.41834700  | 1.27934300  |
| H | -0.17671400 | 3.30703200  | 1.84639100  |
| H | -0.66949000 | 4.68011300  | 0.83202100  |
| C | -0.44547600 | 1.37226700  | -0.13596000 |
| C | -1.14986100 | 0.31528200  | 0.06443800  |
| C | -2.59249600 | -0.13269400 | 0.19538500  |
| O | -2.83660500 | -0.62038400 | 1.52723900  |
| C | -2.24682600 | -1.85600000 | 1.91084500  |
| H | -2.48695400 | -1.98762200 | 2.97028000  |
| H | -2.65371500 | -2.70966900 | 1.35450800  |
| H | -1.15865500 | -1.84687400 | 1.78649600  |
| C | -3.02333900 | -1.13869700 | -0.89340700 |
| C | -4.52610400 | -1.41261500 | -0.83208300 |

|           |             |             |             |    |             |             |             |
|-----------|-------------|-------------|-------------|----|-------------|-------------|-------------|
| C         | -4.99593400 | 0.69795200  | 0.09204400  | C  | -2.48097600 | -0.19578300 | -0.22279400 |
| C         | -3.52047200 | 1.10261000  | 0.09088200  | C  | -2.74916900 | -1.23691800 | 0.88483000  |
| H         | -4.82632200 | -2.06025100 | -1.66194600 | C  | -3.62017400 | 0.85351500  | -0.17858600 |
| H         | -2.77588300 | -0.70707900 | -1.87006800 | C  | -4.17300000 | -1.79123600 | 0.78816500  |
| H         | -2.45819900 | -2.06721900 | -0.80743300 | C  | -4.98939600 | 0.17352800  | -0.22564300 |
| H         | -5.63046800 | 1.57482900  | -0.07330800 | H  | -4.38047200 | -2.45487800 | 1.63340000  |
| H         | -5.26460900 | 0.26058800  | 1.06570100  | H  | -4.28953300 | -2.37129700 | -0.13936800 |
| H         | -3.29057100 | 1.64075100  | -0.83428900 | H  | -5.78636700 | 0.91542800  | -0.11464100 |
| H         | -3.32452500 | 1.77288600  | 0.93354200  | H  | -5.13125600 | -0.33491800 | -1.19200400 |
| H         | -4.78297200 | -1.92781800 | 0.10735700  | O  | -2.50098600 | -0.95302900 | -1.44276900 |
| O         | -5.29677700 | -0.21894900 | -0.95633500 | C  | -2.41616800 | -0.21031400 | -2.65946100 |
| C         | 2.50991200  | -0.09141200 | 1.35118700  | H  | -3.35663300 | 0.30346900  | -2.89452400 |
| C         | 2.55594900  | 1.09786500  | 0.53243700  | H  | -1.59805600 | 0.51920900  | -2.63866600 |
| C         | 2.77770200  | 0.68801400  | -0.82772400 | H  | -2.21492700 | -0.93988300 | -3.44864000 |
| C         | 2.92626300  | -0.74689200 | -0.84474200 | C  | -0.22368600 | 2.88295200  | 0.55432800  |
| C         | 2.79768600  | -1.21697100 | 0.50481100  | C  | 0.76116600  | 3.63210400  | 0.02930200  |
| C         | 2.97712200  | -2.62819500 | 0.96796300  | C  | -1.19651300 | 3.43703700  | 1.57672900  |
| H         | 2.69597900  | -3.34320100 | 0.19363600  | H  | -2.22444900 | 3.40601900  | 1.19770800  |
| H         | 4.03117300  | -2.79763200 | 1.22623500  | H  | -1.18006800 | 2.84880900  | 2.50164900  |
| H         | 2.37892800  | -2.84086000 | 1.85734400  | H  | -0.95199100 | 4.47439800  | 1.82218800  |
| C         | 2.37081500  | -0.12458500 | 2.84173900  | H  | 1.43872300  | 3.22931000  | -0.71539300 |
| H         | 1.92969300  | -1.06455700 | 3.18187300  | H  | 0.87756800  | 4.67188100  | 0.32208900  |
| H         | 3.35714600  | -0.02878000 | 3.31572300  | O  | -5.15136700 | -0.75468900 | 0.84379500  |
| H         | 1.74641400  | 0.69498600  | 3.20545500  | Ru | 0.92540900  | -0.21934200 | -0.38774300 |
| C         | 3.27498200  | -1.57732200 | -2.03971200 | C  | 1.43313200  | -0.84459400 | 1.70663700  |
| H         | 2.80536500  | -2.56178200 | -1.98575300 | C  | 2.31654300  | 0.25244600  | 1.35683200  |
| H         | 2.94993900  | -1.09783500 | -2.96671500 | C  | 1.69709100  | -1.92136000 | 0.80284900  |
| H         | 4.36194100  | -1.72057000 | -2.10059700 | C  | 3.13557500  | -0.16944600 | 0.25985100  |
| C         | 2.97595600  | 1.59116600  | -2.00510000 | C  | 2.73988100  | -1.49339900 | -0.11730900 |
| H         | 4.04900300  | 1.74488800  | -2.18125800 | C  | 4.24406000  | 0.61857600  | -0.36562400 |
| H         | 2.55230000  | 1.16117000  | -2.91666900 | H  | 5.20994300  | 0.29229900  | 0.04235700  |
| H         | 2.52100800  | 2.56968600  | -1.84339100 | H  | 4.27523600  | 0.47770600  | -1.44839000 |
| C         | 2.59110400  | 2.50303500  | 1.04748600  | H  | 4.14227500  | 1.68716800  | -0.16420800 |
| H         | 2.04819800  | 2.60473000  | 1.98931600  | C  | 3.42108400  | -2.35104600 | -1.14434600 |
| H         | 3.63454200  | 2.78668400  | 1.23858100  | H  | 3.80069900  | -1.75168900 | -1.97607200 |
| H         | 2.18149900  | 3.21737800  | 0.33135800  | H  | 4.27534800  | -2.88003000 | -0.70099500 |
| Ru        | 0.87579900  | -0.23799000 | -0.11312600 | H  | 2.74484300  | -3.10548900 | -1.55490100 |
| Cl        | 0.09879600  | -2.50851800 | -0.78013200 | C  | 1.11046900  | -3.30137800 | 0.86209400  |
| <b>A3</b> |             |             |             | H  | 1.74064600  | -3.95206100 | 1.48267000  |
| C         | -0.45020000 | 1.50317000  | 0.17913200  | H  | 0.10857700  | -3.29816200 | 1.29822500  |
| C         | -1.15419500 | 0.48244400  | -0.03294600 | H  | 1.04748600  | -3.75605300 | -0.12983400 |

|    |             |             |             |
|----|-------------|-------------|-------------|
| C  | 0.53338500  | -0.87639000 | 2.90551600  |
| H  | 1.12239100  | -1.04138700 | 3.81725700  |
| H  | -0.00402600 | 0.06735300  | 3.03281900  |
| H  | -0.20314100 | -1.68023100 | 2.83836200  |
| C  | 2.52131700  | 1.49511500  | 2.17002900  |
| H  | 1.63148600  | 1.75480200  | 2.74760400  |
| H  | 3.34182000  | 1.33665500  | 2.88293200  |
| H  | 2.78201100  | 2.35576900  | 1.55042200  |
| Cl | 1.29551300  | 1.13307200  | -2.49510100 |
| H  | -2.02342800 | -2.05224000 | 0.79960900  |
| H  | -2.61069200 | -0.75750400 | 1.85894800  |
| H  | -3.53057700 | 1.41319700  | 0.75784400  |
| H  | -3.52114200 | 1.57257400  | -0.99727200 |
| H  | 0.43834700  | -1.28477900 | -1.71435100 |
| H  | -0.25489900 | -1.24899200 | -1.26516500 |

### TSA3-A4

|   |             |             |             |
|---|-------------|-------------|-------------|
| C | -0.49256900 | 1.44691700  | 0.07676000  |
| C | -1.24285400 | 0.46622700  | -0.14013300 |
| C | -2.58618000 | -0.18994300 | -0.27408800 |
| C | -2.89346600 | -1.06922400 | 0.95943900  |
| C | -3.68034400 | 0.90643300  | -0.36238700 |
| C | -4.33723600 | -1.57475400 | 0.92493500  |
| C | -5.07701100 | 0.28274500  | -0.32344800 |
| H | -4.56854000 | -2.12279400 | 1.84361000  |
| H | -4.47698800 | -2.25815100 | 0.07437000  |
| H | -5.84169100 | 1.06554400  | -0.30234500 |
| H | -5.24489400 | -0.33282500 | -1.22076700 |
| O | -2.63971800 | -1.08883600 | -1.38236500 |
| C | -2.44705900 | -0.52386700 | -2.67712800 |
| H | -3.31858200 | 0.05368700  | -3.01157600 |
| H | -1.55294200 | 0.10925700  | -2.72000700 |
| H | -2.31076100 | -1.36710100 | -3.35982800 |
| C | -0.19115100 | 2.82099300  | 0.42565000  |
| C | 0.83412700  | 3.50312700  | -0.11193000 |
| C | -1.14356400 | 3.44511600  | 1.42569300  |
| H | -2.16706900 | 3.46036900  | 1.03388700  |
| H | -1.16757600 | 2.87378900  | 2.36075000  |
| H | -0.84693000 | 4.47282500  | 1.65319100  |
| H | 1.49097700  | 3.04897600  | -0.84533800 |
| H | 1.00349700  | 4.54206900  | 0.15671200  |
| O | -5.27251600 | -0.50130300 | 0.85129300  |

|    |             |             |             |
|----|-------------|-------------|-------------|
| Ru | 0.85429200  | -0.35344100 | -0.31568600 |
| C  | 1.54680400  | -1.07852500 | 1.70344700  |
| C  | 2.24523300  | 0.18010500  | 1.58476700  |
| C  | 2.03520300  | -1.95287500 | 0.65326800  |
| C  | 3.06676700  | 0.12074900  | 0.43007400  |
| C  | 2.93480000  | -1.19788100 | -0.16621300 |
| C  | 3.98708800  | 1.18738800  | -0.07604100 |
| H  | 5.02997800  | 0.92289300  | 0.14252000  |
| H  | 3.89375500  | 1.30263800  | -1.15959900 |
| H  | 3.78395600  | 2.15361700  | 0.39084400  |
| C  | 3.76058900  | -1.70504700 | -1.30942400 |
| H  | 3.83409700  | -0.95638400 | -2.10223000 |
| H  | 4.77948200  | -1.94111500 | -0.97497700 |
| H  | 3.33275000  | -2.61293500 | -1.74155400 |
| C  | 1.75828900  | -3.42446800 | 0.54066100  |
| H  | 2.48318200  | -3.98465900 | 1.14535200  |
| H  | 0.75929600  | -3.68031100 | 0.90177300  |
| H  | 1.84538400  | -3.77456800 | -0.49040600 |
| C  | 0.70693800  | -1.49685800 | 2.87484500  |
| H  | 1.34710200  | -1.81342100 | 3.70910300  |
| H  | 0.08018300  | -0.67807400 | 3.23800000  |
| H  | 0.05483200  | -2.33628700 | 2.62327500  |
| C  | 2.15763500  | 1.31178500  | 2.56218300  |
| H  | 1.19229700  | 1.32713700  | 3.07382400  |
| H  | 2.93233300  | 1.20151500  | 3.33267300  |
| H  | 2.30406300  | 2.28149200  | 2.08201800  |
| Cl | 1.27450400  | 0.86106800  | -2.49556200 |
| H  | -2.20177600 | -1.91770200 | 0.98350900  |
| H  | -2.73736200 | -0.47536100 | 1.86574800  |
| H  | -3.56315000 | 1.57981600  | 0.49269300  |
| H  | -3.55676500 | 1.50653000  | -1.26906800 |
| H  | 0.34917400  | -1.36373800 | -1.42541500 |
| H  | -0.28165900 | -1.43357700 | -0.18337100 |

### A4

|   |             |             |             |
|---|-------------|-------------|-------------|
| C | -0.54885200 | 1.43494000  | 0.06588200  |
| C | -1.28867100 | 0.43737800  | -0.10714700 |
| C | -2.62578800 | -0.24046200 | -0.19484500 |
| C | -2.88480300 | -1.12262000 | 1.04763900  |
| C | -3.73087900 | 0.84919700  | -0.24141900 |
| C | -4.32653700 | -1.63542400 | 1.06536500  |
| C | -5.12085400 | 0.21573700  | -0.15718300 |

|    |             |             |             |
|----|-------------|-------------|-------------|
| H  | -4.52153400 | -2.18401100 | 1.99207700  |
| H  | -4.49213000 | -2.32026300 | 0.22068500  |
| H  | -5.88991600 | 0.99322000  | -0.11188200 |
| H  | -5.31391200 | -0.40219900 | -1.04779700 |
| O  | -2.71364100 | -1.13774000 | -1.30106000 |
| C  | -2.59163200 | -0.56830600 | -2.60280800 |
| H  | -3.48591700 | -0.00209000 | -2.89454100 |
| H  | -1.70645700 | 0.07241600  | -2.68626700 |
| H  | -2.47840800 | -1.40969300 | -3.29206100 |
| C  | -0.25501900 | 2.82856700  | 0.33697000  |
| C  | 0.68841300  | 3.50780200  | -0.33673500 |
| C  | -1.11127000 | 3.47095800  | 1.40815600  |
| H  | -2.17126800 | 3.44421700  | 1.13013800  |
| H  | -1.01775000 | 2.93922600  | 2.36201800  |
| H  | -0.82137300 | 4.51417600  | 1.56193400  |
| H  | 1.27909200  | 3.03141600  | -1.11156000 |
| H  | 0.85881400  | 4.56177000  | -0.13582200 |
| O  | -5.27092400 | -0.56813300 | 1.02396900  |
| Ru | 0.81946600  | -0.34852700 | -0.23770300 |
| C  | 2.50084300  | 0.43351300  | 1.35857100  |
| C  | 3.12709400  | 0.24337200  | 0.10513700  |
| C  | 1.84356400  | -0.80155100 | 1.71584900  |
| C  | 2.92536500  | -1.13969400 | -0.31543500 |
| C  | 2.18460700  | -1.79858500 | 0.71001800  |
| C  | 3.57958600  | -1.76929000 | -1.50694300 |
| H  | 4.64058900  | -1.96501000 | -1.30272600 |
| H  | 3.10792600  | -2.72027000 | -1.76538900 |
| H  | 3.51912000  | -1.11317900 | -2.37871200 |
| C  | 1.93381300  | -3.27386200 | 0.82531400  |
| H  | 1.85671900  | -3.74962700 | -0.15480200 |
| H  | 2.76287100  | -3.74986800 | 1.36501000  |
| H  | 1.01475900  | -3.48550900 | 1.37677700  |
| C  | 1.19908200  | -1.08513900 | 3.04097700  |
| H  | 1.96678400  | -1.30036900 | 3.79585600  |
| H  | 0.61691100  | -0.23183600 | 3.39883300  |
| H  | 0.53399900  | -1.95013400 | 2.98712900  |
| C  | 2.53189500  | 1.66934400  | 2.20374600  |
| H  | 3.38498300  | 1.63228100  | 2.89413500  |
| H  | 2.62996900  | 2.57614500  | 1.60329000  |
| H  | 1.62815700  | 1.76259100  | 2.81097800  |
| C  | 3.93797700  | 1.23980900  | -0.66024700 |

|    |             |             |             |
|----|-------------|-------------|-------------|
| H  | 3.88013100  | 2.23621700  | -0.21735500 |
| H  | 4.99303400  | 0.93821300  | -0.67374400 |
| H  | 3.59375400  | 1.29974600  | -1.69749600 |
| Cl | 1.04670300  | 0.61569700  | -2.57504200 |
| H  | -2.19105500 | -1.96991600 | 1.04337000  |
| H  | -2.69605100 | -0.53033900 | 1.94908800  |
| H  | -3.58981300 | 1.51951600  | 0.61239000  |
| H  | -3.64233800 | 1.45409400  | -1.14893200 |
| H  | 0.17365900  | -1.48986100 | -1.11342600 |
| H  | -0.20488700 | -1.25981700 | 0.51497900  |

### TSA4-A5

|    |             |             |             |
|----|-------------|-------------|-------------|
| C  | -0.55896300 | 1.36907800  | -0.05826000 |
| C  | -1.26854200 | 0.32353400  | -0.11375400 |
| C  | -2.60414800 | -0.37485600 | -0.13429000 |
| C  | -2.93237800 | -0.95065900 | 1.26253900  |
| C  | -3.71416600 | 0.63748900  | -0.51089000 |
| C  | -4.36375300 | -1.49073900 | 1.30886100  |
| C  | -5.09617900 | -0.00369800 | -0.36797600 |
| H  | -4.61632900 | -1.80921000 | 2.32490600  |
| H  | -4.45987000 | -2.36100200 | 0.64285800  |
| H  | -5.87848000 | 0.73763000  | -0.55776200 |
| H  | -5.21690900 | -0.81954400 | -1.09724400 |
| O  | -2.59038100 | -1.50783900 | -1.00153400 |
| C  | -2.39040800 | -1.24723900 | -2.39053400 |
| H  | -3.28781700 | -0.82899600 | -2.86403500 |
| H  | -1.54144200 | -0.57603200 | -2.56385800 |
| H  | -2.17476700 | -2.21382400 | -2.85388300 |
| C  | -0.41665700 | 2.80411700  | 0.10866700  |
| C  | 0.53045200  | 3.51204000  | -0.53011800 |
| C  | -1.41299400 | 3.45611800  | 1.04568300  |
| H  | -2.43516500 | 3.35896900  | 0.66302700  |
| H  | -1.39467300 | 2.98639800  | 2.03566500  |
| H  | -1.19217600 | 4.52069000  | 1.16380000  |
| H  | 1.22629000  | 3.03516100  | -1.21130400 |
| H  | 0.59391200  | 4.58888300  | -0.40140200 |
| O  | -5.31647300 | -0.49139400 | 0.95323700  |
| Ru | 0.90772500  | -0.27930300 | -0.31723900 |
| C  | 2.39077600  | 0.60780900  | 1.37989900  |
| C  | 3.15100500  | 0.32703300  | 0.21576000  |
| C  | 1.69840200  | -0.60214000 | 1.76315000  |
| C  | 2.98204900  | -1.07492700 | -0.12190400 |

|           |             |             |             |    |             |             |             |
|-----------|-------------|-------------|-------------|----|-------------|-------------|-------------|
| C         | 2.12778200  | -1.66223700 | 0.87497000  | C  | -2.50045700 | -2.07691900 | -1.82082900 |
| C         | 3.76658200  | -1.80078400 | -1.17468000 | H  | -3.33721000 | -1.79653300 | -2.47373200 |
| H         | 4.77712500  | -2.02911700 | -0.81060800 | H  | -1.59987700 | -1.54441100 | -2.14824200 |
| H         | 3.29080800  | -2.74479800 | -1.45062600 | H  | -2.32838800 | -3.15191900 | -1.92553900 |
| H         | 3.86959500  | -1.19841200 | -2.08080900 | C  | -0.68040100 | 2.45466200  | -0.11756400 |
| C         | 1.85594800  | -3.12736500 | 1.05838600  | C  | -0.11051300 | 3.20623100  | -1.07797600 |
| H         | 1.88099600  | -3.66474200 | 0.10781900  | C  | -1.47485800 | 3.07916000  | 1.01244800  |
| H         | 2.61888300  | -3.56911100 | 1.71265700  | H  | -2.50610400 | 2.71056600  | 1.03240200  |
| H         | 0.88148700  | -3.30439100 | 1.51978600  | H  | -1.03270000 | 2.83346400  | 1.98476600  |
| C         | 0.89178900  | -0.77599200 | 3.01648600  | H  | -1.50228100 | 4.16820400  | 0.91322600  |
| H         | 1.55402500  | -0.86853100 | 3.88713000  | H  | 0.46832400  | 2.75014300  | -1.87404500 |
| H         | 0.23180300  | 0.07706000  | 3.19640700  | H  | -0.24452200 | 4.28460600  | -1.09151200 |
| H         | 0.27553300  | -1.67699300 | 2.97481500  | O  | -5.50927300 | 0.10714500  | 0.64527500  |
| C         | 2.35912200  | 1.90031900  | 2.13612200  | Ru | 1.08756300  | -0.37103300 | -0.26734600 |
| H         | 3.18079000  | 1.92491700  | 2.86430800  | C  | 2.32610400  | 0.83186200  | 1.34506100  |
| H         | 2.47324800  | 2.76457100  | 1.47809800  | C  | 3.01733300  | 0.71561600  | 0.09527900  |
| H         | 1.42799600  | 2.01878800  | 2.69508600  | C  | 2.05551600  | -0.49013100 | 1.83241400  |
| C         | 4.03123800  | 1.27684700  | -0.53606900 | C  | 3.23893700  | -0.69560700 | -0.16608600 |
| H         | 3.93877600  | 2.29738100  | -0.15809800 | C  | 2.65149400  | -1.43715000 | 0.92396500  |
| H         | 5.08267500  | 0.97736100  | -0.44279400 | C  | 4.09990100  | -1.23948400 | -1.26611600 |
| H         | 3.77975800  | 1.27999800  | -1.60103700 | H  | 5.16172600  | -1.13480600 | -1.00664000 |
| Cl        | 1.09046100  | 0.65745300  | -2.65755600 | H  | 3.90059300  | -2.29872500 | -1.44497000 |
| H         | -2.22285600 | -1.75002100 | 1.50267200  | H  | 3.92858200  | -0.70272200 | -2.20208200 |
| H         | -2.81763300 | -0.15620000 | 2.00673800  | C  | 2.76889600  | -2.91478900 | 1.16261800  |
| H         | -3.64584200 | 1.49308200  | 0.16741200  | H  | 2.95950100  | -3.45695900 | 0.23412500  |
| H         | -3.57144400 | 1.01379800  | -1.52833900 | H  | 3.60190800  | -3.11903000 | 1.84796400  |
| H         | 0.55703000  | -1.49591900 | -1.25904000 | H  | 1.86296200  | -3.32810900 | 1.61337400  |
| H         | -0.37653500 | -1.12294900 | 0.09428900  | C  | 1.37200000  | -0.82081600 | 3.12520100  |
| <b>A5</b> |             |             |             | H  | 2.07370500  | -0.73666900 | 3.96510700  |
| C         | -0.51632400 | 1.00629100  | -0.08051800 | H  | 0.53881500  | -0.14126000 | 3.32565800  |
| C         | -1.24640700 | -0.07462100 | 0.07285000  | H  | 0.98347300  | -1.84207000 | 3.12242700  |
| C         | -2.71867500 | -0.49912000 | 0.02833500  | C  | 2.02291700  | 2.11174700  | 2.05987000  |
| C         | -3.29855500 | -0.55514200 | 1.45845700  | H  | 2.91190600  | 2.44034000  | 2.61434700  |
| C         | -3.57931200 | 0.46088700  | -0.81837400 | H  | 1.75626400  | 2.91261100  | 1.36642300  |
| C         | -4.80105100 | -0.84835000 | 1.43160500  | H  | 1.21359300  | 1.99216900  | 2.78343500  |
| C         | -5.06317300 | 0.10226100  | -0.70924100 | C  | 3.56817600  | 1.84356800  | -0.72164200 |
| H         | -5.22046600 | -0.78885800 | 2.44076800  | H  | 3.01854300  | 2.77191000  | -0.54791400 |
| H         | -4.97870300 | -1.86332300 | 1.04546400  | H  | 4.61926300  | 2.02353000  | -0.45899600 |
| H         | -5.67280400 | 0.84207000  | -1.23717700 | H  | 3.52275600  | 1.61734400  | -1.78926400 |
| H         | -5.25420300 | -0.88188500 | -1.16476300 | Cl | 0.89141900  | 0.15429600  | -2.72470100 |
| O         | -2.79640700 | -1.85201300 | -0.44258200 | H  | -2.77621700 | -1.32871000 | 2.03259200  |

|   |             |             |             |
|---|-------------|-------------|-------------|
| H | -3.12326100 | 0.40769000  | 1.94905900  |
| H | -3.43334400 | 1.48009800  | -0.45109300 |
| H | -3.26121500 | 0.44865100  | -1.86532600 |
| H | 1.04088800  | -1.80675100 | -0.95345400 |
| H | -0.64223200 | -1.06021400 | 0.20667700  |

**TSA5-A6**

|    |             |             |             |
|----|-------------|-------------|-------------|
| C  | -0.53820600 | 0.86861400  | -0.31106000 |
| C  | -1.31736300 | -0.19124600 | -0.51512700 |
| C  | -2.80513400 | -0.50629600 | -0.31266700 |
| C  | -3.11454400 | -0.81430500 | 1.16901800  |
| C  | -3.72274600 | 0.64082000  | -0.78759600 |
| C  | -4.61518300 | -1.01789700 | 1.39142000  |
| C  | -5.18489800 | 0.33863000  | -0.45036000 |
| H  | -4.83291100 | -1.13125200 | 2.45829800  |
| H  | -4.95227200 | -1.92807300 | 0.87362800  |
| H  | -5.82057300 | 1.19167700  | -0.70740400 |
| H  | -5.53599600 | -0.53277700 | -1.02471300 |
| O  | -3.11143000 | -1.73697800 | -0.99201900 |
| C  | -3.04299800 | -1.72688800 | -2.41303300 |
| H  | -3.89204800 | -1.20372300 | -2.87193400 |
| H  | -2.11248300 | -1.27631100 | -2.78188800 |
| H  | -3.07127200 | -2.77317700 | -2.73051000 |
| C  | -0.75440500 | 2.28050100  | 0.02025300  |
| C  | -0.38422700 | 3.24956900  | -0.83587700 |
| C  | -1.36161300 | 2.60617800  | 1.36987800  |
| H  | -2.41155700 | 2.29907400  | 1.42181000  |
| H  | -0.84092400 | 2.08080200  | 2.17642500  |
| H  | -1.31160300 | 3.68084200  | 1.56828300  |
| H  | 0.06429300  | 3.01856800  | -1.79734900 |
| H  | -0.53998600 | 4.29777500  | -0.59483200 |
| O  | -5.36852500 | 0.10792400  | 0.94511400  |
| Ru | 1.14154400  | -0.36000600 | -0.22305000 |
| C  | 2.35615200  | 0.90067800  | 1.37932400  |
| C  | 3.08536500  | 0.66046200  | 0.16660300  |
| C  | 2.02348000  | -0.36713100 | 1.95473200  |
| C  | 3.28687100  | -0.77053600 | 0.03337000  |
| C  | 2.61807700  | -1.40074900 | 1.14283400  |
| C  | 4.17502700  | -1.42669400 | -0.98074700 |
| H  | 5.23008500  | -1.30930000 | -0.70045400 |
| H  | 3.96636800  | -2.49609300 | -1.06434300 |
| H  | 4.03707200  | -0.98040900 | -1.96836200 |

|    |             |             |             |
|----|-------------|-------------|-------------|
| C  | 2.66324100  | -2.85759800 | 1.50166100  |
| H  | 2.87077700  | -3.48033500 | 0.62892400  |
| H  | 3.45621800  | -3.03858800 | 2.23909600  |
| H  | 1.72236200  | -3.19707900 | 1.94257000  |
| C  | 1.29713000  | -0.59570100 | 3.24575500  |
| H  | 2.01038600  | -0.66614400 | 4.07744600  |
| H  | 0.60594000  | 0.21970600  | 3.47280700  |
| H  | 0.72786500  | -1.52878200 | 3.22494700  |
| C  | 2.10298800  | 2.25360300  | 1.96841000  |
| H  | 3.04615700  | 2.66851700  | 2.34684700  |
| H  | 1.71437500  | 2.95735300  | 1.22667800  |
| H  | 1.40360900  | 2.21053900  | 2.80499600  |
| C  | 3.70483500  | 1.71102100  | -0.70279700 |
| H  | 3.11319800  | 2.63039900  | -0.70397100 |
| H  | 4.70976200  | 1.95945000  | -0.33547300 |
| H  | 3.79730300  | 1.36564300  | -1.73419000 |
| Cl | 1.20703200  | -0.02259100 | -2.70597900 |
| H  | -2.56581300 | -1.71290100 | 1.47331300  |
| H  | -2.76583400 | 0.02044300  | 1.78368400  |
| H  | -3.42658600 | 1.56766100  | -0.29097700 |
| H  | -3.61039800 | 0.80772200  | -1.86339400 |
| H  | 1.18430000  | -1.83688300 | -0.77700000 |
| H  | -0.78957400 | -1.12268700 | -0.84592600 |

**A6**

|   |             |             |             |
|---|-------------|-------------|-------------|
| C | 0.61843500  | 3.46130400  | -0.61233600 |
| H | 0.57506300  | 4.54721200  | -0.61097200 |
| H | 1.58825100  | 2.99952800  | -0.75290800 |
| C | -0.50336300 | 2.71580400  | -0.49621500 |
| C | -1.86245600 | 3.37591900  | -0.39008000 |
| H | -2.49599800 | 3.10359000  | -1.24078300 |
| H | -2.39193900 | 3.07626300  | 0.51962000  |
| H | -1.76015400 | 4.46453800  | -0.37694000 |
| C | -0.39496600 | 1.27471100  | -0.61018900 |
| C | -1.19482900 | 0.17087200  | -0.95040100 |
| C | -2.45631000 | -0.37562500 | -0.26023200 |
| O | -2.41352400 | -1.81637900 | -0.21579400 |
| C | -2.46922700 | -2.53490200 | -1.44053400 |
| H | -2.29397200 | -3.58391100 | -1.18500700 |
| H | -3.44831800 | -2.45972700 | -1.93146400 |
| H | -1.69437100 | -2.22344500 | -2.15158100 |
| C | -3.70774000 | 0.12031400  | -1.02739300 |

|    |             |             |             |
|----|-------------|-------------|-------------|
| C  | -4.99743800 | -0.31402700 | -0.32927800 |
| C  | -3.95840300 | -0.37842700 | 1.78298400  |
| C  | -2.59695500 | 0.03018800  | 1.21451500  |
| H  | -5.86934700 | 0.11646000  | -0.83198500 |
| H  | -3.68093900 | 1.21319500  | -1.06650700 |
| H  | -3.69846400 | -0.23543000 | -2.06328200 |
| H  | -4.08213500 | 0.01231100  | 2.79794600  |
| H  | -4.03045500 | -1.47543700 | 1.82890800  |
| H  | -2.47896700 | 1.11371700  | 1.30499200  |
| H  | -1.80551600 | -0.44503500 | 1.79815500  |
| H  | -5.09815000 | -1.41049400 | -0.35445000 |
| O  | -5.04113800 | 0.14892100  | 1.01829300  |
| C  | 1.44681600  | -0.63540100 | 1.79239900  |
| C  | 1.96944300  | 0.69761400  | 1.55606000  |
| C  | 2.97938600  | 0.60519000  | 0.55687400  |
| C  | 3.10635100  | -0.79134200 | 0.19239900  |
| C  | 2.20578800  | -1.55584500 | 0.97837100  |
| C  | 2.12178300  | -3.05428700 | 1.04314800  |
| H  | 2.36185400  | -3.51787400 | 0.08294500  |
| H  | 2.83337400  | -3.44432000 | 1.78353800  |
| H  | 1.12469000  | -3.38973300 | 1.33881500  |
| C  | 0.56645000  | -1.03669200 | 2.94034700  |
| H  | -0.06168200 | -1.89655600 | 2.69247000  |
| H  | 1.18391400  | -1.32147600 | 3.80367000  |
| H  | -0.08281900 | -0.21955200 | 3.26242100  |
| C  | 4.12203400  | -1.32731900 | -0.76951900 |
| H  | 3.86176600  | -2.33076700 | -1.11377400 |
| H  | 4.21924800  | -0.68447300 | -1.64739900 |
| H  | 5.10601100  | -1.38533000 | -0.28519200 |
| C  | 3.89678500  | 1.69012900  | 0.07129600  |
| H  | 4.90345700  | 1.55863300  | 0.49033900  |
| H  | 4.00078600  | 1.68023200  | -1.01839500 |
| H  | 3.54965700  | 2.68184000  | 0.37013000  |
| C  | 1.60711500  | 1.90961800  | 2.36158900  |
| H  | 0.55057800  | 1.90937500  | 2.64111800  |
| H  | 2.19068300  | 1.93145300  | 3.29140900  |
| H  | 1.81036500  | 2.83771000  | 1.82307500  |
| Ru | 0.88694300  | -0.13085100 | -0.35497300 |
| Cl | 1.39914800  | -0.40234400 | -2.76762200 |
| H  | 0.12212400  | -1.48590800 | -0.56077600 |
| H  | -1.17451500 | -0.08641100 | -2.01260400 |

## TSA6-A7

|   |             |             |             |
|---|-------------|-------------|-------------|
| C | 0.27111900  | 3.40719500  | 0.57750200  |
| H | 0.14198100  | 4.38835000  | 1.02711500  |
| H | 1.26833500  | 3.13158700  | 0.25208400  |
| C | -0.78152400 | 2.58165500  | 0.38435100  |
| C | -2.18227900 | 3.00494300  | 0.77280500  |
| H | -2.81509300 | 3.12455800  | -0.11313300 |
| H | -2.66507000 | 2.26790900  | 1.42217800  |
| H | -2.15983300 | 3.96045600  | 1.30392200  |
| C | -0.54711600 | 1.32517200  | -0.30337400 |
| C | -1.25205400 | 0.43070300  | -1.16022900 |
| C | -2.49990300 | -0.42687600 | -0.86948600 |
| O | -2.38035100 | -1.69720600 | -1.54320100 |
| C | -2.40959300 | -1.71793700 | -2.96548200 |
| H | -2.18511300 | -2.74798900 | -3.25615200 |
| H | -3.39410100 | -1.45193500 | -3.37089400 |
| H | -1.65356000 | -1.06331000 | -3.41660100 |
| C | -3.76843800 | 0.33203300  | -1.32602000 |
| C | -5.03638000 | -0.44786900 | -0.97052200 |
| C | -4.00139200 | -1.50808700 | 0.85978900  |
| C | -2.66408200 | -0.80770600 | 0.60812700  |
| H | -5.92720600 | 0.13841000  | -1.21716100 |
| H | -3.79825500 | 1.29834300  | -0.81582700 |
| H | -3.73948200 | 0.53905400  | -2.40096200 |
| H | -4.14778900 | -1.68094800 | 1.93060600  |
| H | -4.01366300 | -2.48348800 | 0.35104900  |
| H | -2.60596500 | 0.09640000  | 1.22215800  |
| H | -1.84616500 | -1.46862500 | 0.90239100  |
| H | -5.08042700 | -1.38940100 | -1.53989400 |
| O | -5.10807200 | -0.71886800 | 0.42707200  |
| C | 1.32654200  | -1.20094200 | 1.26773600  |
| C | 1.94586400  | 0.09571100  | 1.45245000  |
| C | 2.91492400  | 0.26297500  | 0.42713300  |
| C | 2.96965700  | -0.97977200 | -0.33912900 |
| C | 2.02115500  | -1.87780900 | 0.19052000  |
| C | 1.78189300  | -3.29999300 | -0.22957100 |
| H | 2.07732100  | -3.47208600 | -1.26751900 |
| H | 2.35952800  | -3.99133200 | 0.39860300  |
| H | 0.72828200  | -3.57533600 | -0.13262900 |
| C | 0.42390000  | -1.87581700 | 2.25962200  |
| H | -0.17187200 | -2.66504900 | 1.79458100  |



|    |             |             |             |
|----|-------------|-------------|-------------|
| H  | 1.02340500  | -2.34619200 | 3.05139000  |
| H  | -0.25724200 | -1.17144800 | 2.74308600  |
| C  | 3.94212300  | -1.23930300 | -1.44919400 |
| H  | 3.73756500  | -2.18757500 | -1.95223900 |
| H  | 3.90461000  | -0.44446100 | -2.19967000 |
| H  | 4.96640700  | -1.28410100 | -1.05699800 |
| C  | 3.87436200  | 1.40348000  | 0.25537900  |
| H  | 4.85905000  | 1.15263500  | 0.67301700  |
| H  | 4.02138000  | 1.64451000  | -0.80167700 |
| H  | 3.52405400  | 2.30667900  | 0.76173200  |
| C  | 1.69926000  | 1.00473300  | 2.61962800  |
| H  | 0.65985300  | 0.96612500  | 2.95566600  |
| H  | 2.32657300  | 0.69933900  | 3.46805000  |
| H  | 1.94104100  | 2.04532300  | 2.39196000  |
| Ru | 0.82834200  | 0.04848200  | -0.58343800 |
| Cl | 1.47887600  | 0.82429800  | -2.84337700 |
| H  | -0.16731100 | -0.89953900 | -1.40106200 |
| H  | -1.21809500 | 0.73152000  | -2.21187600 |

### A7

|   |             |             |             |
|---|-------------|-------------|-------------|
| C | -0.35915500 | 1.19244700  | -2.77807800 |
| H | -0.52846100 | 1.81046700  | -3.65697700 |
| H | 0.04014500  | 0.19588600  | -2.93495400 |
| C | -0.68693500 | 1.62703300  | -1.54301900 |
| C | -1.26543500 | 3.01595200  | -1.34240800 |
| H | -2.32037300 | 2.98486600  | -1.05239400 |
| H | -0.73277000 | 3.55868300  | -0.55335900 |
| H | -1.18800100 | 3.59787300  | -2.26506700 |
| C | -0.48429900 | 0.73830000  | -0.38510100 |
| C | -1.50521800 | 0.76789100  | 0.74467000  |
| C | -2.87582800 | 0.02805900  | 0.57176900  |
| O | -3.58928300 | 0.15798100  | 1.82135300  |
| C | -4.15740300 | 1.41579800  | 2.15110800  |
| H | -4.51303400 | 1.32926800  | 3.18226200  |
| H | -3.43140300 | 2.23889500  | 2.11055900  |
| H | -5.01423200 | 1.67728300  | 1.51594500  |
| C | -2.66433800 | -1.48760800 | 0.42447200  |
| C | -3.98264700 | -2.22290700 | 0.18083300  |
| C | -4.98095000 | -0.33045200 | -0.79834400 |
| C | -3.72000300 | 0.52004200  | -0.61876100 |
| H | -3.79898000 | -3.28276700 | -0.02109700 |
| H | -1.97905000 | -1.67760300 | -0.40646300 |

|    |             |             |             |
|----|-------------|-------------|-------------|
| H  | -2.19251200 | -1.87577900 | 1.33548200  |
| H  | -5.51939700 | -0.02732700 | -1.70198100 |
| H  | -5.65978200 | -0.19760000 | 0.05932300  |
| H  | -3.11655200 | 0.44744600  | -1.52857800 |
| H  | -4.00126500 | 1.57160500  | -0.50068500 |
| H  | -4.62845800 | -2.15003700 | 1.06924000  |
| O  | -4.66869900 | -1.71054600 | -0.96107100 |
| C  | 2.33081300  | 0.95899700  | 1.31218600  |
| C  | 2.51934600  | 1.35336800  | -0.05744400 |
| C  | 3.05527900  | 0.20772400  | -0.75704700 |
| C  | 3.41527800  | -0.80216500 | 0.23943000  |
| C  | 2.94218000  | -0.36641000 | 1.47961200  |
| C  | 3.00875900  | -1.08718200 | 2.79182300  |
| H  | 3.24979800  | -2.14514000 | 2.66571900  |
| H  | 3.77652600  | -0.64067600 | 3.43729300  |
| H  | 2.05866100  | -1.01786300 | 3.33143000  |
| C  | 1.89210000  | 1.83733100  | 2.44736000  |
| H  | 1.35755600  | 1.26698400  | 3.21310600  |
| H  | 2.75616500  | 2.30783000  | 2.93646000  |
| H  | 1.23144900  | 2.63721700  | 2.10295900  |
| C  | 4.07612400  | -2.10589400 | -0.08814300 |
| H  | 4.20123400  | -2.72869800 | 0.80102700  |
| H  | 3.48685800  | -2.67336900 | -0.81651400 |
| H  | 5.06985900  | -1.93835900 | -0.52161000 |
| C  | 3.48825800  | 0.17984900  | -2.19089100 |
| H  | 4.53287400  | 0.50964900  | -2.28057800 |
| H  | 3.42453900  | -0.82858600 | -2.60737500 |
| H  | 2.87685300  | 0.84321600  | -2.80728800 |
| C  | 2.34851400  | 2.72416800  | -0.63678200 |
| H  | 1.67384500  | 3.33774300  | -0.03486000 |
| H  | 3.31971900  | 3.23588700  | -0.66834600 |
| H  | 1.96129600  | 2.69323900  | -1.65856200 |
| Ru | 1.06998600  | -0.27900800 | 0.01327300  |
| Cl | 0.64713400  | -2.44059900 | -1.10141300 |
| H  | -1.71516000 | 1.81887500  | 0.98619800  |
| H  | -1.06139600 | 0.32191800  | 1.64396800  |

### A8

|   |             |             |             |
|---|-------------|-------------|-------------|
| C | -0.64720500 | 0.25863800  | -0.20260700 |
| C | -1.73154600 | 0.39649300  | 0.80511100  |
| C | -3.16888700 | -0.10501100 | 0.43617700  |
| C | -4.13009300 | 0.32085100  | 1.56691400  |

|    |             |             |             |                |             |             |             |
|----|-------------|-------------|-------------|----------------|-------------|-------------|-------------|
| C  | -3.69318400 | 0.49085400  | -0.88552500 | H              | 2.15644300  | 3.36911200  | -0.47687800 |
| C  | -5.58291300 | -0.00454200 | 1.21877300  | H              | 1.18658400  | 3.28146300  | 1.00102400  |
| C  | -5.17164800 | 0.15647700  | -1.09657700 | C              | 4.22093500  | 1.46475400  | -1.25316400 |
| H  | -6.25887000 | 0.38588600  | 1.98615600  | H              | 3.60239000  | 2.10994000  | -1.88425800 |
| H  | -5.72192700 | -1.09457200 | 1.16275100  | H              | 5.02631300  | 2.08870200  | -0.84314700 |
| H  | -5.55364800 | 0.66014500  | -1.99013600 | H              | 4.68139400  | 0.71196100  | -1.89782900 |
| H  | -5.29957100 | -0.92819400 | -1.23882300 | Cl             | 1.26061900  | -2.44673200 | -1.13814000 |
| O  | -3.23494200 | -1.53588800 | 0.45527300  | H              | -3.84737300 | -0.18976800 | 2.49460300  |
| C  | -2.57686000 | -2.25294400 | -0.57906800 | H              | -4.03407700 | 1.39956700  | 1.73187000  |
| H  | -3.02913200 | -2.08710900 | -1.56594800 | H              | -3.57801000 | 1.57974100  | -0.84186700 |
| H  | -1.50440400 | -2.02182300 | -0.63611000 | H              | -3.11089300 | 0.14102200  | -1.74326200 |
| H  | -2.68413100 | -3.31291200 | -0.32968300 | H              | -1.44642000 | -0.09630700 | 1.73927500  |
| C  | -0.41595900 | 0.99417000  | -1.41155400 | H              | -1.83252400 | 1.47226100  | 1.01645000  |
| C  | 0.34165900  | 0.31150600  | -2.38614000 | <b>TSA8-A9</b> |             |             |             |
| C  | -0.67118400 | 2.48410100  | -1.51531100 | C              | -0.82373500 | -0.01661700 | -0.28101400 |
| H  | -1.59001200 | 2.65303200  | -2.08938800 | C              | -1.83066000 | 0.39665000  | 0.75559700  |
| H  | -0.79430600 | 2.96069700  | -0.53992500 | C              | -3.28413300 | -0.01437700 | 0.37821100  |
| H  | 0.14287500  | 2.98111800  | -2.05176200 | C              | -4.21014700 | -0.05943400 | 1.59707300  |
| H  | 0.12474700  | -0.71693500 | -2.64662200 | C              | -3.92419500 | 0.85379300  | -0.71703000 |
| H  | 0.84589700  | 0.90094200  | -3.15065100 | C              | -5.64933800 | -0.40500800 | 1.20589500  |
| O  | -5.97811500 | 0.60428900  | -0.00958700 | C              | -5.37705100 | 0.44363600  | -0.97389600 |
| Ru | 1.21231000  | -0.10005700 | -0.32814800 | H              | -6.31274700 | -0.31844600 | 2.07135900  |
| C  | 2.40014100  | 1.52850100  | 0.62936800  | H              | -5.70237000 | -1.44254800 | 0.84034200  |
| C  | 3.41880600  | 0.83705800  | -0.15101200 | H              | -5.84825000 | 1.13445300  | -1.67922400 |
| C  | 1.95233800  | 0.64177100  | 1.68279900  | H              | -5.41415600 | -0.56607200 | -1.41348400 |
| C  | 3.51239000  | -0.47150100 | 0.34104900  | O              | -3.15112100 | -1.40594100 | -0.06359900 |
| C  | 2.55711800  | -0.62422200 | 1.44637900  | C              | -2.25987100 | -1.59386500 | -1.04304000 |
| C  | 4.43149500  | -1.55688800 | -0.12455800 | H              | -2.38124000 | -1.05638200 | -1.98228600 |
| H  | 5.19092200  | -1.76938600 | 0.63906800  | H              | -0.94109200 | -1.17036500 | -0.52760900 |
| H  | 3.87892200  | -2.48221800 | -0.31227200 | H              | -1.94029900 | -2.63148200 | -1.12425800 |
| H  | 4.95239100  | -1.27992700 | -1.04448000 | C              | -0.32164300 | 0.79330500  | -1.36574600 |
| C  | 2.45706900  | -1.84641000 | 2.30934500  | C              | 0.48302400  | 0.12662700  | -2.32719900 |
| H  | 2.42141200  | -2.75534800 | 1.70208000  | C              | -0.56468100 | 2.28351500  | -1.45549500 |
| H  | 3.32616000  | -1.92618400 | 2.97632700  | H              | -1.47598900 | 2.47367500  | -2.03761800 |
| H  | 1.56122300  | -1.82366700 | 2.93581200  | H              | -0.69042300 | 2.76642300  | -0.48373700 |
| C  | 1.10538000  | 1.02201400  | 2.86170200  | H              | 0.25894100  | 2.77770800  | -1.97893100 |
| H  | 1.74225800  | 1.33108600  | 3.70136300  | H              | 0.25187300  | -0.88402200 | -2.65026700 |
| H  | 0.44147800  | 1.85913200  | 2.63317700  | H              | 0.99795800  | 0.73991700  | -3.06464500 |
| H  | 0.49021800  | 0.18735100  | 3.20789000  | O              | -6.15622300 | 0.48848500  | 0.21773500  |
| C  | 2.14495100  | 3.00616100  | 0.55426100  | Ru             | 1.30824800  | -0.18886400 | -0.28881300 |
| H  | 2.92913200  | 3.54992200  | 1.09840400  | C              | 2.30730900  | 1.54763600  | 0.74959100  |

|           |             |             |             |    |             |             |             |
|-----------|-------------|-------------|-------------|----|-------------|-------------|-------------|
| C         | 3.23412100  | 0.99812200  | -0.21603100 | H  | -6.84765600 | 0.85412900  | -0.41257100 |
| C         | 2.05802700  | 0.54401000  | 1.75605800  | H  | -5.83660500 | -0.33242400 | -1.26540300 |
| C         | 3.50534100  | -0.34967300 | 0.15839500  | O  | -3.15635300 | -0.52363400 | -1.04561800 |
| C         | 2.76400000  | -0.63463400 | 1.38287100  | C  | -2.05013100 | 0.07391800  | -1.70814000 |
| C         | 4.47318000  | -1.29067800 | -0.49507900 | H  | -2.36603300 | 0.91376500  | -2.34814300 |
| H         | 5.42173600  | -1.32555500 | 0.05873100  | H  | -0.69897000 | -0.34533300 | -0.12103400 |
| H         | 4.07081400  | -2.30653600 | -0.53116700 | H  | -1.57189800 | -0.68649600 | -2.32775900 |
| H         | 4.70075300  | -0.98591400 | -1.52026500 | C  | -0.03389900 | 1.53957900  | -0.97378500 |
| C         | 2.86370700  | -1.90614000 | 2.17149000  | C  | 0.76134400  | 1.21085900  | -2.07520900 |
| H         | 2.89712000  | -2.77663200 | 1.51175300  | C  | 0.00612700  | 2.92792700  | -0.38430900 |
| H         | 3.77320500  | -1.91597400 | 2.78778000  | H  | -0.78417700 | 3.54065900  | -0.84100100 |
| H         | 2.00798800  | -2.02971800 | 2.84135600  | H  | -0.15851500 | 2.94132600  | 0.69419000  |
| C         | 1.26547200  | 0.74513500  | 3.01445500  | H  | 0.95840700  | 3.41646700  | -0.60370900 |
| H         | 1.90939100  | 1.12448700  | 3.81975200  | H  | 0.46778100  | 0.45500900  | -2.79356000 |
| H         | 0.46073900  | 1.47218100  | 2.87560200  | H  | 1.49676800  | 1.93328700  | -2.42188200 |
| H         | 0.81966500  | -0.18915300 | 3.36665300  | O  | -6.17546500 | -0.65698400 | 0.76075100  |
| C         | 1.90387900  | 2.99036600  | 0.84695000  | Ru | 1.36374200  | -0.08808100 | -0.31289200 |
| H         | 2.65420800  | 3.55821500  | 1.41434500  | C  | 2.26330700  | 0.88203300  | 1.52021400  |
| H         | 1.81807900  | 3.46021000  | -0.13575700 | C  | 3.15828800  | 0.94109300  | 0.39534700  |
| H         | 0.94869500  | 3.11161500  | 1.36542400  | C  | 2.03591600  | -0.50913700 | 1.83309300  |
| C         | 3.87462000  | 1.75917500  | -1.34169000 | C  | 3.45787100  | -0.41569000 | -0.00357800 |
| H         | 3.20818400  | 2.52687900  | -1.74496800 | C  | 2.77587500  | -1.31210700 | 0.92070000  |
| H         | 4.78441800  | 2.26884200  | -0.99570600 | C  | 4.46114100  | -0.83842000 | -1.03347200 |
| H         | 4.16097300  | 1.09923600  | -2.16495700 | H  | 5.45258700  | -0.95782700 | -0.57498600 |
| Cl        | 1.12217700  | -2.64884800 | -0.86772200 | H  | 4.18446700  | -1.79400900 | -1.48457300 |
| H         | -3.83126400 | -0.78938000 | 2.32064300  | H  | 4.55382700  | -0.10049400 | -1.83465000 |
| H         | -4.19025800 | 0.92709800  | 2.07313600  | C  | 2.90970400  | -2.80470900 | 0.93434800  |
| H         | -3.89961800 | 1.89317000  | -0.37221700 | H  | 2.86160600  | -3.21271000 | -0.07827200 |
| H         | -3.35645100 | 0.81127900  | -1.65136600 | H  | 3.87022300  | -3.10141100 | 1.37568300  |
| H         | -1.59850600 | -0.07150500 | 1.71775300  | H  | 2.11711300  | -3.27485400 | 1.52246600  |
| H         | -1.80521900 | 1.47991200  | 0.89879200  | C  | 1.18527300  | -1.00396200 | 2.96383100  |
| <b>A9</b> |             |             |             | H  | 1.78260400  | -1.08414800 | 3.88180900  |
| C         | -1.15029300 | 0.59477200  | -0.57386800 | H  | 0.35889200  | -0.31913300 | 3.17266700  |
| C         | -2.19718000 | 1.08805100  | 0.44608000  | H  | 0.76647100  | -1.99158300 | 2.75495400  |
| C         | -3.46191000 | 0.23456500  | 0.15674200  | C  | 1.82729000  | 2.03606000  | 2.37436500  |
| C         | -3.78674500 | -0.78395500 | 1.26101500  | H  | 2.47312600  | 2.11107700  | 3.25948600  |
| C         | -4.70840400 | 1.10254900  | -0.10150700 | H  | 1.89581700  | 2.98625100  | 1.84171400  |
| C         | -5.07501100 | -1.54648800 | 0.94606400  | H  | 0.80087600  | 1.92056700  | 2.73522400  |
| C         | -5.94821300 | 0.23591900  | -0.32874700 | C  | 3.78694400  | 2.17522800  | -0.17907600 |
| H         | -5.34960500 | -2.20724500 | 1.77440500  | H  | 3.15099400  | 3.05432800  | -0.05158700 |
| H         | -4.93449900 | -2.16716100 | 0.04759400  | H  | 4.73961000  | 2.38311900  | 0.32636100  |

|    |             |             |             |
|----|-------------|-------------|-------------|
| H  | 4.00032100  | 2.06068500  | -1.24505300 |
| Cl | 0.97168500  | -1.97283400 | -1.90687900 |
| H  | -2.95231700 | -1.48532500 | 1.37790800  |
| H  | -3.91411000 | -0.24876600 | 2.20971300  |
| H  | -4.87409000 | 1.75465600  | 0.76513600  |
| H  | -4.53796400 | 1.74748900  | -0.97201000 |
| H  | -1.86155600 | 0.97958600  | 1.48046000  |
| H  | -2.41601200 | 2.14667700  | 0.27888600  |

**TSA8-A10**

|    |             |             |             |
|----|-------------|-------------|-------------|
| C  | 2.31890700  | 1.41066600  | 1.23742900  |
| C  | 2.56614400  | 0.31004400  | 0.17036500  |
| C  | 3.02459600  | 0.86779500  | -1.21585700 |
| C  | 2.83967600  | 2.38632800  | -1.49430800 |
| C  | 2.85637500  | 2.77560800  | 0.82737100  |
| H  | 1.24113300  | 1.52691600  | 1.38613400  |
| H  | 2.73647100  | 1.08792400  | 2.19689700  |
| O  | 2.27889900  | 3.13808700  | -0.42306600 |
| C  | 1.29951300  | -0.58777300 | 0.03399000  |
| C  | 0.08435400  | 0.10546800  | -0.46957800 |
| H  | 3.95652400  | 2.78812200  | 0.76097300  |
| H  | 2.55703500  | 3.54229800  | 1.54858200  |
| C  | -0.31684900 | 0.42378600  | -1.80901700 |
| C  | -0.13982600 | -0.54555900 | -2.96017900 |
| H  | 0.07619400  | -1.56299900 | -2.62567600 |
| H  | -1.03244900 | -0.56352900 | -3.59354900 |
| H  | 0.69631600  | -0.21425800 | -3.58810600 |
| C  | -1.15295500 | 1.55266800  | -1.91635500 |
| H  | -0.92431200 | 2.46759200  | -1.38450900 |
| H  | -1.77336700 | 1.65579300  | -2.80529400 |
| H  | 2.52571600  | 0.29582400  | -2.00217200 |
| H  | 4.08655300  | 0.63233400  | -1.31431500 |
| H  | 2.16832900  | 2.54416800  | -2.34288100 |
| H  | 1.56464600  | -1.40449300 | -0.65349200 |
| H  | 1.10697600  | -1.02419500 | 1.01802700  |
| Ru | -1.74801600 | 0.33482200  | -0.08217800 |
| O  | 3.53498700  | -0.66288200 | 0.62558900  |
| C  | -3.93113000 | -0.65521600 | -0.36784100 |
| C  | -3.95138300 | -0.04081100 | 0.88920900  |
| C  | -2.82069200 | -1.60135200 | -0.37740800 |
| C  | -2.85307000 | -0.59424900 | 1.69562100  |
| C  | -2.23412800 | -1.63125000 | 0.94515300  |

|    |             |             |             |
|----|-------------|-------------|-------------|
| C  | -4.91917200 | 0.98585400  | 1.38725000  |
| H  | -5.51399800 | 0.58085500  | 2.21584000  |
| H  | -4.39181400 | 1.87142200  | 1.75637200  |
| H  | -5.61112200 | 1.30253000  | 0.60291400  |
| C  | -2.62819300 | -0.27011500 | 3.14161600  |
| H  | -3.40268900 | -0.73019300 | 3.76991900  |
| H  | -1.65895600 | -0.63746500 | 3.48935300  |
| H  | -2.66000300 | 0.80984000  | 3.30999000  |
| C  | -1.24416200 | -2.63938100 | 1.44916100  |
| H  | -1.76906900 | -3.51251000 | 1.85941200  |
| H  | -0.58900200 | -2.99962000 | 0.65213100  |
| H  | -0.61651800 | -2.23181400 | 2.24573600  |
| C  | -2.58641600 | -2.61316800 | -1.46126700 |
| H  | -3.30216000 | -3.44062200 | -1.36146100 |
| H  | -2.72501800 | -2.18417200 | -2.45709600 |
| H  | -1.58204100 | -3.04084300 | -1.41005600 |
| C  | -4.88212900 | -0.44543400 | -1.50958700 |
| H  | -5.65383500 | -1.22686000 | -1.51989600 |
| H  | -5.38864300 | 0.52058800  | -1.44338900 |
| H  | -4.36723400 | -0.48853600 | -2.47373000 |
| Cl | -1.87367300 | 2.56048500  | 1.01141000  |
| H  | 3.81699800  | 2.81950700  | -1.76192100 |
| C  | 4.80419500  | -0.18923000 | 1.04236800  |
| H  | 5.39248100  | -1.07591800 | 1.29659500  |
| H  | 5.34041600  | 0.35803900  | 0.25394900  |
| H  | 4.74992800  | 0.45066600  | 1.93300500  |

**A10**

|   |            |             |             |
|---|------------|-------------|-------------|
| C | 2.96942000 | 0.83793300  | 0.98966200  |
| C | 3.09933500 | -0.58089700 | 0.38188100  |
| C | 3.66509000 | -0.47385800 | -1.05446000 |
| C | 3.30976900 | 0.86645700  | -1.69562200 |
| C | 3.97966300 | 1.83375700  | 0.41681600  |
| H | 1.96288200 | 1.21534700  | 0.78127000  |
| H | 3.07074700 | 0.78534000  | 2.07918700  |
| O | 3.88491600 | 1.97976200  | -1.00566900 |
| C | 1.72853300 | -1.32604800 | 0.43456300  |
| C | 0.64521600 | -0.78720300 | -0.43167800 |
| H | 5.00638600 | 1.54400900  | 0.68082300  |
| H | 3.80636100 | 2.82689200  | 0.84781500  |
| C | 0.15612100 | -1.27689100 | -1.68549800 |
| C | 0.01689300 | -2.76042100 | -1.96049600 |

|    |             |             |             |
|----|-------------|-------------|-------------|
| H  | 0.06134400  | -3.36360600 | -1.05043900 |
| H  | -0.92088500 | -2.97524600 | -2.48198800 |
| H  | 0.83549000  | -3.08289000 | -2.61608300 |
| C  | -0.46207700 | -0.30861800 | -2.50350100 |
| H  | 0.00195600  | 0.65367400  | -2.67941200 |
| H  | -1.15997000 | -0.64762400 | -3.26789200 |
| H  | 3.30136900  | -1.29880800 | -1.67641400 |
| H  | 4.75653400  | -0.55930100 | -1.01932100 |
| H  | 2.21766200  | 0.98784200  | -1.74814200 |
| H  | 1.94062300  | -2.36773700 | 0.15856900  |
| H  | 1.41544300  | -1.30934800 | 1.48272000  |
| Ru | -1.04100800 | 0.06739900  | -0.33841400 |
| O  | 3.90415700  | -1.47169600 | 1.18169000  |
| C  | -3.41140000 | -0.24414900 | -0.04132600 |
| C  | -3.10617100 | 0.96938900  | 0.58742600  |
| C  | -2.57820900 | -1.27537900 | 0.56470600  |
| C  | -2.07335500 | 0.72198700  | 1.60209100  |
| C  | -1.83503300 | -0.67959000 | 1.65410800  |
| C  | -3.71709300 | 2.31035600  | 0.32794900  |
| H  | -4.27271400 | 2.65362200  | 1.20994500  |
| H  | -2.94513000 | 3.05498500  | 0.10960000  |
| H  | -4.41290900 | 2.28270900  | -0.51421600 |
| C  | -1.57355800 | 1.75626000  | 2.56565100  |
| H  | -2.32171100 | 1.96241700  | 3.34303800  |
| H  | -0.65888400 | 1.42791600  | 3.06637700  |
| H  | -1.35864200 | 2.69881000  | 2.05480700  |
| C  | -1.06924700 | -1.41747500 | 2.71215800  |
| H  | -1.73337900 | -1.67306900 | 3.54875200  |
| H  | -0.64668700 | -2.35335700 | 2.33781900  |
| H  | -0.25313800 | -0.81430900 | 3.11832400  |
| C  | -2.74924600 | -2.74640500 | 0.31706500  |
| H  | -3.61861300 | -3.12179500 | 0.87387900  |
| H  | -2.92536100 | -2.96358900 | -0.73993500 |
| H  | -1.87929800 | -3.32179300 | 0.64260100  |
| C  | -4.43056800 | -0.49331000 | -1.11459700 |
| H  | -5.36319000 | -0.88205700 | -0.68408500 |
| H  | -4.67418600 | 0.41998200  | -1.66306800 |
| H  | -4.07812000 | -1.23313300 | -1.83917100 |
| Cl | -0.50187400 | 2.41853400  | -0.89979900 |
| H  | 3.69241500  | 0.91390100  | -2.72115800 |
| C  | 5.19152000  | -1.04660000 | 1.59555200  |

|   |            |             |            |
|---|------------|-------------|------------|
| H | 5.15552800 | -0.20109100 | 2.29544800 |
| H | 5.63840800 | -1.89843300 | 2.11738700 |
| H | 5.84969000 | -0.78120900 | 0.75691100 |

### TSA10-A11

|    |             |             |             |
|----|-------------|-------------|-------------|
| C  | 3.20969900  | -0.70319000 | -1.25962600 |
| C  | 3.27143900  | 0.57072500  | -0.35689700 |
| C  | 3.63692300  | 0.14760700  | 1.09119400  |
| C  | 2.76471100  | -1.02608600 | 1.40721000  |
| C  | 3.69639200  | -1.96369400 | -0.55088400 |
| H  | 2.18035900  | -0.86808200 | -1.59078000 |
| H  | 3.80919300  | -0.55063100 | -2.16177400 |
| O  | 3.00205100  | -2.15228000 | 0.71219800  |
| C  | 1.88149400  | 1.24363600  | -0.27031600 |
| C  | 0.90842400  | 0.44967400  | 0.58491500  |
| H  | 4.77160000  | -1.92493800 | -0.34261600 |
| H  | 3.48741200  | -2.86421000 | -1.13021600 |
| C  | 0.17409300  | 1.02621700  | 1.68678500  |
| C  | 0.08332100  | 2.51905900  | 1.91942000  |
| H  | 0.13002700  | 3.10374700  | 0.99776700  |
| H  | -0.84075000 | 2.77484400  | 2.44457700  |
| H  | 0.91827200  | 2.84373700  | 2.55595400  |
| C  | -0.57589400 | 0.11185400  | 2.47359100  |
| H  | -0.17504900 | -0.86234200 | 2.73490000  |
| H  | -1.29426300 | 0.52134500  | 3.18220500  |
| H  | 3.46946800  | 0.96729900  | 1.79322600  |
| H  | 4.68580900  | -0.16378000 | 1.16744000  |
| H  | 1.49219400  | -0.58319900 | 0.94340700  |
| H  | 2.04227000  | 2.24518900  | 0.14139600  |
| H  | 1.49778500  | 1.36095300  | -1.28810400 |
| Ru | -1.06755600 | -0.14686000 | 0.32604000  |
| O  | 4.13409200  | 1.57630800  | -0.87970500 |
| C  | -3.33139200 | -0.14622200 | -0.07088400 |
| C  | -2.71206600 | -0.86428800 | -1.14900500 |
| C  | -2.79913500 | 1.18904200  | -0.09053200 |
| C  | -1.82467900 | 0.01088500  | -1.85817300 |
| C  | -1.86827300 | 1.28794100  | -1.19754000 |
| C  | -3.02997200 | -2.27353600 | -1.54853800 |
| H  | -3.84562000 | -2.27664700 | -2.28475700 |
| H  | -2.16945800 | -2.76874900 | -2.00408600 |
| H  | -3.34756900 | -2.87555500 | -0.69508500 |
| C  | -1.11144500 | -0.30143900 | -3.14240400 |

|    |             |             |             |
|----|-------------|-------------|-------------|
| H  | -1.74923700 | -0.08766200 | -4.01204700 |
| H  | -0.20173500 | 0.29528900  | -3.25565000 |
| H  | -0.82854700 | -1.35642500 | -3.20113700 |
| C  | -1.25404700 | 2.55450300  | -1.72034600 |
| H  | -1.92357400 | 3.03061700  | -2.45003700 |
| H  | -1.07135700 | 3.28305300  | -0.92657600 |
| H  | -0.30512300 | 2.36730700  | -2.23039600 |
| C  | -3.29886200 | 2.33278900  | 0.74462700  |
| H  | -4.22905700 | 2.73668400  | 0.32160200  |
| H  | -3.51763800 | 2.02384400  | 1.77096300  |
| H  | -2.57859500 | 3.15247800  | 0.78512600  |
| C  | -4.43000600 | -0.65353100 | 0.81919000  |
| H  | -5.41771100 | -0.51136700 | 0.35716400  |
| H  | -4.32104600 | -1.72185800 | 1.02786600  |
| H  | -4.44304800 | -0.12983600 | 1.77960100  |
| Cl | -0.58125300 | -2.56941100 | 0.79944100  |
| H  | 2.46594900  | -1.23667200 | 2.43271700  |
| C  | 5.50893100  | 1.24953400  | -1.02734800 |
| H  | 5.66962400  | 0.34748000  | -1.63234400 |
| H  | 5.97126400  | 2.09387800  | -1.54583000 |
| H  | 6.01589300  | 1.11936100  | -0.06175900 |

**A11**

|   |             |             |             |
|---|-------------|-------------|-------------|
| C | -4.29075100 | -0.85746300 | 1.14074600  |
| C | -3.69331200 | 0.46604900  | 0.56968800  |
| C | -4.01796900 | 0.54320100  | -0.93840500 |
| C | -3.19733900 | -0.65137000 | -1.43532700 |
| C | -4.73704000 | -1.81273600 | 0.02514500  |
| H | -3.55147400 | -1.34175400 | 1.78749200  |
| H | -5.16216000 | -0.63684000 | 1.76647700  |
| O | -3.80853000 | -1.89654400 | -1.06235100 |
| C | -2.15160800 | 0.39664600  | 0.53381300  |
| C | -1.81656900 | -0.51890500 | -0.67706900 |
| H | -5.72176300 | -1.50287000 | -0.35492300 |
| H | -4.84599800 | -2.83310600 | 0.40529300  |
| C | -0.69012800 | -0.05410400 | -1.58132800 |
| C | -0.79992800 | 1.30961600  | -2.21848300 |
| H | -1.00061600 | 2.10602600  | -1.49797500 |
| H | 0.10347600  | 1.56292100  | -2.77724500 |
| H | -1.63727700 | 1.30760200  | -2.93019800 |
| C | 0.26411000  | -0.93641500 | -2.01227100 |
| H | 0.20735300  | -1.98875500 | -1.75060200 |

|    |             |             |             |
|----|-------------|-------------|-------------|
| H  | 0.93891700  | -0.66505400 | -2.81929200 |
| H  | -3.63333500 | 1.47703000  | -1.36029300 |
| H  | -5.07876100 | 0.46364100  | -1.18958000 |
| H  | -1.56365200 | -1.52140000 | -0.32970200 |
| H  | -1.77766600 | 1.41422100  | 0.38812000  |
| H  | -1.73251200 | 0.01630300  | 1.46908300  |
| Ru | 1.49241700  | -0.34270200 | -0.00979500 |
| O  | -4.04940500 | 1.60584800  | 1.34778400  |
| C  | 3.61139100  | -0.16095100 | -0.20977100 |
| C  | 3.26754400  | -0.03939400 | 1.19319800  |
| C  | 3.00844700  | 0.94800900  | -0.92076200 |
| C  | 2.40912000  | 1.10654200  | 1.32437300  |
| C  | 2.26195300  | 1.72641800  | 0.02417300  |
| C  | 3.78842700  | -0.89270800 | 2.30983800  |
| H  | 4.73243200  | -0.48625000 | 2.69738500  |
| H  | 3.08224800  | -0.94021500 | 3.14280100  |
| H  | 3.98081700  | -1.91624600 | 1.97875700  |
| C  | 1.82217900  | 1.62875800  | 2.60035200  |
| H  | 2.47764400  | 2.39292900  | 3.04034700  |
| H  | 0.84597000  | 2.09311800  | 2.43308300  |
| H  | 1.69779800  | 0.83387800  | 3.34026500  |
| C  | 1.57760400  | 3.03587600  | -0.23272100 |
| H  | 2.24723200  | 3.86846800  | 0.02281500  |
| H  | 1.29865800  | 3.15220600  | -1.28187600 |
| H  | 0.67507700  | 3.15111100  | 0.37462300  |
| C  | 3.23451400  | 1.27241200  | -2.36681600 |
| H  | 4.16674800  | 1.84079400  | -2.48703000 |
| H  | 3.32483700  | 0.36867400  | -2.97601000 |
| H  | 2.42587100  | 1.88014200  | -2.77993800 |
| C  | 4.54983200  | -1.16920300 | -0.80030500 |
| H  | 5.58128600  | -0.79044700 | -0.77929100 |
| H  | 4.53218400  | -2.10936200 | -0.24295500 |
| H  | 4.30113800  | -1.38885100 | -1.84239600 |
| Cl | 0.74251100  | -2.49872200 | 0.94237500  |
| H  | -3.07408500 | -0.68505100 | -2.52190000 |
| C  | -5.39785200 | 2.03463700  | 1.25129600  |
| H  | -6.11745600 | 1.25048300  | 1.52623700  |
| H  | -5.51446100 | 2.86412900  | 1.95472500  |
| H  | -5.64977100 | 2.39578800  | 0.24467500  |

**TSA11-A12**

|   |            |            |            |
|---|------------|------------|------------|
| C | 1.43192800 | 1.37146000 | 1.77754400 |
|---|------------|------------|------------|

|   |             |             |             |
|---|-------------|-------------|-------------|
| H | 2.08548300  | 1.12949100  | 2.61113700  |
| H | 1.54825900  | 2.35559500  | 1.33588000  |
| C | 0.30510500  | 0.61747700  | 1.54102200  |
| C | -0.04884300 | -0.52454800 | 2.46380600  |
| H | -0.79888800 | -0.18096300 | 3.19015000  |
| H | -0.48130400 | -1.38302200 | 1.94433000  |
| H | 0.82229100  | -0.86193100 | 3.02819200  |
| C | -0.77680300 | 1.14128000  | 0.61125300  |
| C | -1.44667300 | 0.10564400  | -0.33138600 |
| C | -2.96030300 | 0.43239200  | -0.26541900 |
| O | -3.79379600 | -0.59835100 | -0.79679000 |
| C | -3.14341700 | 0.78598800  | 1.22134400  |
| C | -1.99669100 | 1.78568700  | 1.39194400  |
| C | -3.05002300 | 3.05024100  | -0.41750500 |
| C | -3.30302800 | 1.68090200  | -1.10781900 |
| H | -1.74789000 | 1.99699400  | 2.43549200  |
| H | -4.11905100 | 1.22253400  | 1.45702900  |
| H | -2.98283800 | -0.08689800 | 1.86165600  |
| H | -4.01452800 | 3.53469100  | -0.22025200 |
| H | -2.49911900 | 3.70771700  | -1.09961500 |
| H | -4.36860500 | 1.60964300  | -1.34520900 |
| H | -2.76093500 | 1.63099600  | -2.05724700 |
| H | -0.33754600 | 1.95103200  | 0.02567900  |
| O | -2.32819400 | 3.04787400  | 0.82810400  |
| C | 2.64583100  | -1.76675400 | -1.12160300 |
| C | 2.52987900  | -2.03317200 | 0.29302700  |
| C | 3.50440600  | -1.22458200 | 0.96982500  |
| C | 4.22082700  | -0.45592100 | -0.02672400 |
| C | 3.70019200  | -0.81644200 | -1.33221200 |
| C | 4.23598300  | -0.34781400 | -2.65152700 |
| H | 4.57251300  | 0.69030100  | -2.59765100 |
| H | 5.09069900  | -0.96205300 | -2.96489600 |
| H | 3.47859100  | -0.40946700 | -3.43772900 |
| C | 1.82449800  | -2.42756000 | -2.18667300 |
| H | 1.78883500  | -1.83012900 | -3.10110100 |
| H | 2.25290200  | -3.40528600 | -2.44592500 |
| H | 0.79747100  | -2.60096200 | -1.85216500 |
| C | 5.40328100  | 0.42708400  | 0.23411800  |
| H | 6.32812200  | -0.16658100 | 0.24190000  |
| H | 5.50993000  | 1.19421100  | -0.53666600 |
| H | 5.32605500  | 0.92861800  | 1.20283300  |

|    |             |             |             |
|----|-------------|-------------|-------------|
| C  | 3.83882400  | -1.26571100 | 2.43048800  |
| H  | 4.64190500  | -1.99284700 | 2.61200100  |
| H  | 4.19143800  | -0.29627100 | 2.79210000  |
| H  | 2.98357400  | -1.56630600 | 3.04075400  |
| C  | 1.67774700  | -3.10764200 | 0.90109300  |
| H  | 0.70307900  | -3.18558200 | 0.41034800  |
| H  | 2.17106400  | -4.08357200 | 0.79584200  |
| H  | 1.50843400  | -2.94190100 | 1.96670400  |
| Ru | 2.16968000  | 0.13543700  | -0.10111200 |
| Cl | 2.13087000  | 2.31205800  | -1.31284400 |
| H  | -1.28139400 | -0.91429900 | 0.02683900  |
| H  | -1.06590300 | 0.16144000  | -1.35522300 |
| C  | -3.87385000 | -1.81540400 | -0.07344600 |
| H  | -2.89537200 | -2.28924700 | 0.08369800  |
| H  | -4.36239800 | -1.69273500 | 0.90293900  |
| H  | -4.48473600 | -2.49147400 | -0.67881700 |

## A12

|   |             |             |             |
|---|-------------|-------------|-------------|
| C | -0.17868500 | -0.85010600 | 2.06540700  |
| H | -0.83989600 | -0.50647000 | 2.85567300  |
| H | -0.14368300 | -1.92052300 | 1.88519300  |
| C | 0.79068200  | -0.02290200 | 1.56260500  |
| C | 0.92831700  | 1.38871300  | 2.07825300  |
| H | 1.77897100  | 1.44098000  | 2.77145400  |
| H | 1.12274800  | 2.11375400  | 1.28374700  |
| H | 0.03925700  | 1.70123000  | 2.62810400  |
| C | 1.89427600  | -0.58395900 | 0.68274300  |
| C | 2.21644300  | 0.20748500  | -0.62320200 |
| C | 3.75770400  | 0.42056700  | -0.61657800 |
| O | 4.19927500  | 1.47604600  | -1.46890300 |
| C | 4.05845100  | 0.55876000  | 0.88834800  |
| C | 3.28564700  | -0.65366700 | 1.42038000  |
| C | 4.09559100  | -2.08270900 | -0.32806600 |
| C | 4.50892000  | -0.82896700 | -1.10903900 |
| H | 3.18757800  | -0.67518600 | 2.50869100  |
| H | 5.12526600  | 0.50789900  | 1.12595500  |
| H | 3.64844900  | 1.48476200  | 1.30202200  |
| H | 4.84005500  | -2.87602600 | -0.44479400 |
| H | 3.14551400  | -2.47253800 | -0.72036700 |
| H | 5.58201100  | -0.64124000 | -0.99059500 |
| H | 4.31357200  | -0.98768400 | -2.17583500 |
| H | 1.60194700  | -1.60483800 | 0.43577000  |

|            |             |             |             |   |             |             |             |
|------------|-------------|-------------|-------------|---|-------------|-------------|-------------|
| O          | 3.98422300  | -1.85706900 | 1.08236800  | H | -2.35600700 | 2.51003000  | -2.38592900 |
| C          | -2.47930400 | 0.85331900  | -1.42642800 | H | -1.94418500 | 4.19911500  | -2.01569400 |
| C          | -2.14383100 | 1.68621400  | -0.28525300 | C | -0.57507400 | 1.40410900  | -0.53561100 |
| C          | -2.78525200 | 1.13394300  | 0.87158900  | C | -1.07056300 | 0.13917600  | -0.91336300 |
| C          | -3.47164300 | -0.07256300 | 0.46340300  | C | -2.28550100 | -0.45923900 | -0.16991200 |
| C          | -3.31392800 | -0.21874000 | -0.97359900 | O | -2.31590000 | -1.89828900 | -0.28794200 |
| C          | -3.98286000 | -1.25616000 | -1.82329900 | C | -2.71416900 | -2.45823100 | -1.53308500 |
| H          | -4.08711100 | -2.20479000 | -1.29038900 | H | -2.51161100 | -3.53096900 | -1.46775500 |
| H          | -4.99033400 | -0.92420700 | -2.10816700 | H | -3.78579000 | -2.32869900 | -1.72874000 |
| H          | -3.42544200 | -1.44862100 | -2.74315200 | H | -2.15349600 | -2.05419500 | -2.38488400 |
| C          | -2.05485500 | 1.11550400  | -2.83950400 | C | -3.58388100 | 0.17567900  | -0.73767600 |
| H          | -2.07833900 | 0.20392600  | -3.44194400 | C | -4.82282400 | -0.27903500 | 0.04154700  |
| H          | -2.72332900 | 1.84723900  | -3.31324300 | C | -3.57652200 | -0.61790200 | 2.01044200  |
| H          | -1.04083000 | 1.52376600  | -2.88388200 | C | -2.27512300 | -0.17379500 | 1.34241900  |
| C          | -4.34599700 | -0.91918400 | 1.33825200  | H | -5.71152300 | 0.24974200  | -0.31793200 |
| H          | -5.37724300 | -0.53918800 | 1.33257700  | H | -3.49643700 | 1.26235700  | -0.64533100 |
| H          | -4.37614400 | -1.95658800 | 0.99411300  | H | -3.70584100 | -0.04776800 | -1.80271600 |
| H          | -4.00019800 | -0.91604600 | 2.37565800  | H | -3.57687000 | -0.33969300 | 3.06901400  |
| C          | -2.85159800 | 1.74333700  | 2.24001800  | H | -3.68349900 | -1.71125500 | 1.94429700  |
| H          | -3.79649800 | 2.28944800  | 2.36389800  | H | -2.15191100 | 0.90347500  | 1.49141300  |
| H          | -2.81227100 | 0.98610600  | 3.02826900  | H | -1.42521900 | -0.66765600 | 1.81832400  |
| H          | -2.04141200 | 2.45565800  | 2.41070800  | H | -4.99398700 | -1.35805100 | -0.09635600 |
| C          | -1.39222100 | 2.98155600  | -0.36018100 | O | -4.71258100 | 0.02068200  | 1.42962400  |
| H          | -0.59953200 | 2.94587100  | -1.11321400 | C | 1.50142200  | -1.82231600 | -0.60837300 |
| H          | -2.06938900 | 3.79974300  | -0.64135400 | C | 1.35667200  | -1.74579700 | 0.84308800  |
| H          | -0.93987700 | 3.24655000  | 0.59800000  | C | 2.35643100  | -0.87742100 | 1.32553300  |
| Ru         | -1.39782800 | -0.35447100 | 0.03877200  | C | 3.18516400  | -0.47374300 | 0.19168900  |
| Cl         | -0.63675200 | -2.53195000 | -0.85168600 | C | 2.68795100  | -1.10332800 | -0.97491600 |
| H          | 1.71835400  | 1.18112500  | -0.63065000 | C | 3.30527700  | -1.08237900 | -2.34248800 |
| H          | 1.88563100  | -0.33507700 | -1.51337900 | H | 3.87736700  | -0.16820800 | -2.51725300 |
| C          | 3.91103000  | 2.80535500  | -1.07003500 | H | 3.99211000  | -1.93107000 | -2.45918400 |
| H          | 2.84040400  | 2.98049200  | -0.89532800 | H | 2.54880800  | -1.16353700 | -3.12691900 |
| H          | 4.46344300  | 3.10372700  | -0.16834900 | C | 0.79554400  | -2.80015500 | -1.49644100 |
| H          | 4.22821200  | 3.45003400  | -1.89506000 | H | 0.67783800  | -2.41550500 | -2.51312200 |
| <b>A6a</b> |             |             |             | H | 1.37934000  | -3.72845100 | -1.56601100 |
| C          | -1.16456500 | 3.59039200  | 0.40936600  | H | -0.18838400 | -3.05079900 | -1.10407100 |
| H          | -1.62059800 | 4.57274600  | 0.31399300  | C | 4.45562000  | 0.30534500  | 0.31000700  |
| H          | -0.80069100 | 3.29919800  | 1.38720700  | H | 4.78422300  | 0.69396300  | -0.65711400 |
| C          | -1.07429800 | 2.76971400  | -0.65038000 | H | 4.33784600  | 1.14859800  | 0.99350900  |
| C          | -1.56203200 | 3.17442300  | -2.02785900 | H | 5.25261200  | -0.34254200 | 0.69909200  |
| H          | -0.74532200 | 3.12293300  | -2.75807400 | C | 2.64178400  | -0.50229400 | 2.74753700  |



|    |             |             |             |
|----|-------------|-------------|-------------|
| H  | 3.52596700  | -1.03619100 | 3.12010200  |
| H  | 2.84254000  | 0.56965300  | 2.83418100  |
| H  | 1.80426000  | -0.74657900 | 3.40557600  |
| C  | 0.41429200  | -2.58615300 | 1.64970300  |
| H  | -0.55135600 | -2.70135600 | 1.15391300  |
| H  | 0.84406900  | -3.58966600 | 1.77815000  |
| H  | 0.24889900  | -2.17390900 | 2.64816300  |
| Ru | 0.98950000  | 0.39240200  | -0.19634000 |
| Cl | 1.98482700  | 2.47439000  | 0.74836800  |
| H  | 1.31269000  | 0.91549800  | -1.64281000 |
| H  | -1.05167100 | -0.13299500 | -1.97113500 |

**TSA6a-Z**

|   |             |             |             |
|---|-------------|-------------|-------------|
| C | -1.30558800 | 3.50385200  | 0.16436900  |
| H | -1.79733500 | 4.45989800  | 0.00104500  |
| H | -0.99538600 | 3.26292300  | 1.17326000  |
| C | -1.10390100 | 2.65741000  | -0.85662700 |
| C | -1.50949500 | 2.99148800  | -2.27828100 |
| H | -0.63964000 | 2.96459800  | -2.94627200 |
| H | -2.23435700 | 2.26804300  | -2.66816700 |
| H | -1.94989000 | 3.99115200  | -2.33183600 |
| C | -0.54964500 | 1.31209300  | -0.67604100 |
| C | -1.05223600 | 0.01413500  | -0.87210100 |
| C | -2.30296100 | -0.49049500 | -0.12729000 |
| O | -2.35087000 | -1.93479800 | -0.18485300 |
| C | -2.75218800 | -2.54622200 | -1.40398200 |
| H | -2.53682700 | -3.61328900 | -1.29849100 |
| H | -3.82686800 | -2.43465700 | -1.59590200 |
| H | -2.20395300 | -2.16958000 | -2.27653400 |
| C | -3.58079700 | 0.14439000  | -0.73521800 |
| C | -4.83563600 | -0.23775300 | 0.05704400  |
| C | -3.61242100 | -0.52616000 | 2.04715000  |
| C | -2.29116400 | -0.15410500 | 1.37410100  |
| H | -5.70747200 | 0.29792800  | -0.33226400 |
| H | -3.46536600 | 1.23190300  | -0.69762100 |
| H | -3.70137800 | -0.13214600 | -1.78792500 |
| H | -3.61217700 | -0.20529500 | 3.09355300  |
| H | -3.75552500 | -1.61724900 | 2.02392900  |
| H | -2.11966100 | 0.92047300  | 1.48953300  |
| H | -1.46345600 | -0.67317900 | 1.86532000  |
| H | -5.03691600 | -1.31689300 | -0.03040400 |
| O | -4.72214300 | 0.12454200  | 1.42964000  |

|    |             |             |             |
|----|-------------|-------------|-------------|
| C  | 1.59733900  | -1.75991000 | -0.70852500 |
| C  | 1.46306100  | -1.75856400 | 0.74251200  |
| C  | 2.43396300  | -0.87327100 | 1.26638200  |
| C  | 3.22317800  | -0.36035800 | 0.15088800  |
| C  | 2.72860200  | -0.94289300 | -1.04655400 |
| C  | 3.29737300  | -0.77358200 | -2.42431200 |
| H  | 3.78897500  | 0.19463500  | -2.54462600 |
| H  | 4.04547800  | -1.55262000 | -2.62097800 |
| H  | 2.52425600  | -0.86003600 | -3.19191600 |
| C  | 0.89941700  | -2.69210900 | -1.65038400 |
| H  | 0.71494400  | -2.22658800 | -2.62333900 |
| H  | 1.51867100  | -3.58172700 | -1.82783900 |
| H  | -0.05491700 | -3.02646500 | -1.24377400 |
| C  | 4.43794100  | 0.50144000  | 0.29287100  |
| H  | 4.73767000  | 0.93651700  | -0.66393800 |
| H  | 4.25902700  | 1.31877300  | 0.99566500  |
| H  | 5.28107600  | -0.09318300 | 0.66877300  |
| C  | 2.72105000  | -0.58316700 | 2.70733100  |
| H  | 3.62456700  | -1.11469200 | 3.03406400  |
| H  | 2.88589300  | 0.48646700  | 2.86283700  |
| H  | 1.89816600  | -0.89707000 | 3.35419800  |
| C  | 0.53635300  | -2.64200400 | 1.52108200  |
| H  | -0.43491600 | -2.73976300 | 1.03161200  |
| H  | 0.97340200  | -3.64659100 | 1.60772100  |
| H  | 0.37664900  | -2.26712400 | 2.53499800  |
| Ru | 1.02336200  | 0.35843000  | -0.12630600 |
| Cl | 1.74313700  | 2.42860400  | 1.09307700  |
| H  | 0.98648800  | 1.19299700  | -1.51518900 |
| H  | -0.90561400 | -0.47854300 | -1.83326200 |

**Z**

|   |             |             |             |
|---|-------------|-------------|-------------|
| C | -1.56287300 | 3.00739900  | 0.81742000  |
| H | -2.04238300 | 3.94151400  | 1.09994200  |
| H | -1.25654900 | 2.35498000  | 1.62545900  |
| C | -1.32270700 | 2.72160700  | -0.46831700 |
| C | -1.66867000 | 3.71143900  | -1.56232600 |
| H | -0.76709400 | 4.00780800  | -2.11460100 |
| H | -2.35750800 | 3.27601500  | -2.29734500 |
| H | -2.12891400 | 4.61503700  | -1.15269700 |
| C | -0.70318700 | 1.47623200  | -1.00163200 |
| C | -1.12826600 | 0.16584100  | -0.91611000 |
| C | -2.34629000 | -0.44199600 | -0.20786900 |

|   |             |             |             |            |             |             |             |
|---|-------------|-------------|-------------|------------|-------------|-------------|-------------|
| O | -2.45596500 | -1.82321100 | -0.63509100 | H          | 0.91092000  | -4.01371500 | 0.26239700  |
| C | -2.89220500 | -2.07772000 | -1.96373100 | H          | 0.16502900  | -3.04811900 | 1.53567200  |
| H | -2.69558300 | -3.13664200 | -2.15453900 | Ru         | 1.16841600  | 0.26960600  | 0.08135500  |
| H | -3.96716800 | -1.89966700 | -2.09414300 | Cl         | 1.79628900  | 2.50816200  | 0.95467200  |
| H | -2.35169400 | -1.48649400 | -2.71469600 | H          | -0.02364100 | 1.67113900  | -1.83418800 |
| C | -3.64894700 | 0.33403700  | -0.52817200 | H          | -0.74940600 | -0.49010000 | -1.68958700 |
| C | -4.84880300 | -0.25291300 | 0.21987800  | <b>A8'</b> |             |             |             |
| C | -3.49950600 | -1.07253500 | 1.96656200  | C          | -0.23593300 | 0.99272600  | -2.51311000 |
| C | -2.21701600 | -0.53798100 | 1.32611500  | H          | -0.32724000 | 1.56098400  | -3.43646700 |
| H | -5.73676500 | 0.36569100  | 0.05455000  | H          | 0.10729500  | -0.03397200 | -2.58191000 |
| H | -3.51293900 | 1.37140400  | -0.21529300 | C          | -0.60286100 | 1.52713300  | -1.32916300 |
| H | -3.84421000 | 0.34338900  | -1.60559400 | C          | -1.13693400 | 2.94844200  | -1.26563900 |
| H | -3.41973400 | -1.04583500 | 3.05794700  | H          | -2.22174900 | 2.97065800  | -1.11829200 |
| H | -3.66828000 | -2.11608900 | 1.66119200  | H          | -0.69002100 | 3.51151300  | -0.43955400 |
| H | -2.00848500 | 0.45744600  | 1.72330200  | H          | -0.91751400 | 3.47952200  | -2.19642500 |
| H | -1.37522100 | -1.18683800 | 1.58274100  | C          | -0.53683700 | 0.70255700  | -0.10034200 |
| H | -5.07443100 | -1.26914000 | -0.13994300 | C          | -1.72036900 | 0.85887100  | 0.84689700  |
| O | -4.63253800 | -0.27483600 | 1.62860600  | C          | -3.04621400 | 0.07823300  | 0.52990400  |
| C | 1.76207400  | -1.45785400 | -1.13304500 | O          | -3.91973300 | 0.25115200  | 1.66696000  |
| C | 1.40709000  | -1.93579800 | 0.17207600  | C          | -4.53028400 | 1.51596400  | 1.86878700  |
| C | 2.28983300  | -1.30265200 | 1.13141300  | H          | -5.02520900 | 1.46265100  | 2.84315200  |
| C | 3.20565600  | -0.46433100 | 0.41680100  | H          | -3.80772100 | 2.34238200  | 1.89888900  |
| C | 2.84942300  | -0.51360600 | -0.98507000 | H          | -5.29170100 | 1.74663400  | 1.11213100  |
| C | 3.58596700  | 0.15586600  | -2.10534800 | C          | -2.80780500 | -1.44121800 | 0.47786500  |
| H | 4.05121700  | 1.08903600  | -1.77780300 | C          | -4.08105700 | -2.20087300 | 0.10031100  |
| H | 4.38314400  | -0.49777300 | -2.48563900 | C          | -4.95974200 | -0.36276300 | -1.07675600 |
| H | 2.92025100  | 0.38401100  | -2.94263000 | C          | -3.73467300 | 0.50609500  | -0.78096400 |
| C | 1.21738800  | -1.95032600 | -2.44002700 | H          | -3.86518200 | -3.26566500 | -0.03283400 |
| H | 1.12935300  | -1.14516200 | -3.17609700 | H          | -2.02315100 | -1.65683900 | -0.25369100 |
| H | 1.89129300  | -2.70535400 | -2.86660900 | H          | -2.45553500 | -1.78713700 | 1.45701700  |
| H | 0.23759800  | -2.41900900 | -2.32219200 | H          | -5.38275000 | -0.10424000 | -2.05274100 |
| C | 4.37048000  | 0.27728900  | 0.99548600  | H          | -5.74005200 | -0.19963100 | -0.31632600 |
| H | 4.54452400  | 1.22237600  | 0.47760200  | H          | -3.02121600 | 0.39646500  | -1.60287500 |
| H | 4.22347500  | 0.50063700  | 2.05425100  | H          | -4.03028200 | 1.56031600  | -0.74935700 |
| H | 5.28057600  | -0.33096400 | 0.90529000  | H          | -4.83354000 | -2.10153200 | 0.89775000  |
| C | 2.30011800  | -1.56864000 | 2.60598600  | O          | -4.62301000 | -1.74535400 | -1.13857000 |
| H | 2.88032300  | -2.47454300 | 2.82770800  | C          | 2.50273200  | 0.91113400  | 1.37811500  |
| H | 2.75073300  | -0.74250300 | 3.16116200  | C          | 2.56667700  | 1.35272200  | 0.00304200  |
| H | 1.28957200  | -1.72535500 | 2.99363600  | C          | 3.00496700  | 0.25116100  | -0.77732400 |
| C | 0.44334400  | -3.04317900 | 0.47843600  | C          | 3.41326700  | -0.82262300 | 0.13841100  |
| H | -0.47461400 | -2.96530300 | -0.10758600 | C          | 3.12616500  | -0.41607500 | 1.44406900  |

|                 |             |             |             |    |             |             |             |
|-----------------|-------------|-------------|-------------|----|-------------|-------------|-------------|
| C               | 3.38758300  | -1.16772400 | 2.71692200  | H  | -2.84191300 | -1.98501600 | -2.53824400 |
| H               | 3.52043300  | -2.23742900 | 2.53712700  | H  | -1.17513900 | -1.89770000 | -1.90590500 |
| H               | 4.29830900  | -0.79683200 | 3.20533300  | C  | -3.18465800 | 0.35834600  | -1.10262400 |
| H               | 2.56853600  | -1.04732100 | 3.43225600  | C  | -4.67077800 | 0.11707100  | -1.37817800 |
| C               | 2.25013700  | 1.79029100  | 2.57065200  | C  | -5.05621600 | -0.77358300 | 0.76554400  |
| H               | 1.88755500  | 1.21288400  | 3.42566300  | C  | -3.60164100 | -0.58016300 | 1.19960900  |
| H               | 3.17372900  | 2.29561900  | 2.88539300  | H  | -5.05902900 | 0.87843200  | -2.06189500 |
| H               | 1.50953400  | 2.56469100  | 2.35278100  | H  | -3.05214100 | 1.38858500  | -0.76206200 |
| C               | 4.03485700  | -2.11021600 | -0.30840500 | H  | -2.60883000 | 0.25885100  | -2.02818300 |
| H               | 4.21570600  | -2.78400900 | 0.53282800  | H  | -5.72906400 | -0.66123700 | 1.62170700  |
| H               | 3.38908500  | -2.62818400 | -1.02516000 | H  | -5.19481800 | -1.78253800 | 0.34916200  |
| H               | 4.99794300  | -1.92493800 | -0.80094600 | H  | -3.50684000 | 0.37007300  | 1.72875500  |
| C               | 3.27478500  | 0.23991300  | -2.25198200 | H  | -3.30813200 | -1.38044300 | 1.88826800  |
| H               | 4.33919500  | 0.42656100  | -2.45071300 | H  | -4.82177800 | -0.86704600 | -1.84900500 |
| H               | 3.02462000  | -0.72874500 | -2.69403400 | O  | -5.45221300 | 0.20877100  | -0.18877600 |
| H               | 2.70049600  | 1.00844500  | -2.77494000 | C  | 1.89386900  | -1.13974500 | 1.52484400  |
| C               | 2.33054600  | 2.75069000  | -0.47951400 | C  | 2.36660700  | 0.21883100  | 1.58294000  |
| H               | 1.61254300  | 3.28366400  | 0.14809700  | C  | 3.13465000  | 0.46623600  | 0.40318500  |
| H               | 3.27327300  | 3.31346900  | -0.44849700 | C  | 3.19166000  | -0.75929000 | -0.36954400 |
| H               | 1.96876000  | 2.77445300  | -1.50961200 | C  | 2.43441500  | -1.75664200 | 0.33714500  |
| Ru              | 1.02440400  | -0.34965000 | 0.29156500  | C  | 2.33374000  | -3.21318600 | -0.01019900 |
| Cl              | 0.60237400  | -2.31845900 | -1.19532500 | H  | 2.48436100  | -3.38209800 | -1.07855400 |
| H               | -1.98101800 | 1.92262100  | 0.91000000  | H  | 3.09924700  | -3.78533400 | 0.53037500  |
| H               | -1.44071900 | 0.54266200  | 1.85355000  | H  | 1.36014900  | -3.62749800 | 0.26369900  |
| H               | 0.24383700  | -0.78912800 | 1.79661500  | C  | 1.11694000  | -1.83189800 | 2.60385300  |
| H               | -0.00808100 | -1.38919600 | 1.28893500  | H  | 0.63877800  | -2.74372700 | 2.23668200  |
| <b>TSA5-A6'</b> |             |             |             | H  | 1.77983300  | -2.11711200 | 3.43069100  |
| C               | -0.01916400 | 3.28476100  | 0.25771000  | H  | 0.33974400  | -1.18445600 | 3.02211600  |
| H               | -0.22533800 | 4.32140900  | 0.51219700  | C  | 4.03473700  | -0.96624200 | -1.59321300 |
| H               | 0.82732400  | 3.07384600  | -0.38436000 | H  | 3.70763500  | -1.83928100 | -2.16331900 |
| C               | -0.83184300 | 2.29612200  | 0.69207900  | H  | 3.99140300  | -0.09861200 | -2.25626200 |
| C               | -2.00413000 | 2.62272300  | 1.59859000  | H  | 5.08607100  | -1.12197000 | -1.31673200 |
| H               | -2.96595400 | 2.41939800  | 1.11837600  | C  | 3.87514000  | 1.72701000  | 0.08144200  |
| H               | -1.96840000 | 2.02788400  | 2.51767500  | H  | 4.91626500  | 1.64927500  | 0.42257400  |
| H               | -1.98808800 | 3.68045100  | 1.87597600  | H  | 3.88769000  | 1.91759400  | -0.99371500 |
| C               | -0.50532000 | 0.90065700  | 0.41671700  | H  | 3.42924000  | 2.59365800  | 0.57629800  |
| C               | -1.21717500 | -0.27393500 | 0.44745400  | C  | 2.15117100  | 1.18809700  | 2.70551000  |
| C               | -2.64640700 | -0.59513900 | -0.01922600 | H  | 1.29415000  | 0.90965900  | 3.32340400  |
| O               | -2.68384300 | -1.97456200 | -0.44034500 | H  | 3.03433400  | 1.21411600  | 3.35735300  |
| C               | -2.17488600 | -2.30792000 | -1.72837200 | H  | 1.98826200  | 2.20505000  | 2.33730600  |
| H               | -2.11300200 | -3.40012300 | -1.75275000 | Ru | 1.06197700  | -0.08714400 | -0.34940300 |

|    |             |             |             |
|----|-------------|-------------|-------------|
| Cl | 1.15828300  | 1.49943200  | -2.30589500 |
| H  | -0.76503800 | -1.15696000 | 0.89859100  |
| H  | 0.85792800  | -1.01093300 | -1.63667300 |

**A6'**

|   |             |             |             |
|---|-------------|-------------|-------------|
| C | 0.20851800  | 3.62487700  | 0.16969800  |
| H | 0.03783300  | 4.68960500  | 0.30923000  |
| H | 1.17478100  | 3.30883400  | -0.20240300 |
| C | -0.76454900 | 2.72691400  | 0.45079000  |
| C | -2.10824000 | 3.18633600  | 0.97751100  |
| H | -2.92888800 | 2.87009100  | 0.32628100  |
| H | -2.30276200 | 2.77491100  | 1.97372900  |
| H | -2.13731400 | 4.27714300  | 1.04840800  |
| C | -0.47147000 | 1.31329900  | 0.33470600  |
| C | -1.07610800 | 0.07971800  | 0.67854500  |
| C | -2.42178600 | -0.47875600 | 0.17076800  |
| O | -2.39132900 | -1.92500700 | 0.20863500  |
| C | -1.93286900 | -2.65519200 | -0.92182300 |
| H | -1.86438500 | -3.69771400 | -0.59622900 |
| H | -2.63823400 | -2.61296800 | -1.76246100 |
| H | -0.95020400 | -2.32724600 | -1.27264900 |
| C | -2.85764900 | 0.07950600  | -1.19547600 |
| C | -4.31062300 | -0.27027900 | -1.53197200 |
| C | -4.90624800 | -0.51626400 | 0.72681700  |
| C | -3.50980400 | -0.13980300 | 1.22076400  |
| H | -4.62308900 | 0.25378900  | -2.44064200 |
| H | -2.76015000 | 1.16995100  | -1.16577500 |
| H | -2.19380600 | -0.26920200 | -1.99268600 |
| H | -5.66789800 | -0.19501400 | 1.44455800  |
| H | -4.98469300 | -1.60758900 | 0.60767800  |
| H | -3.48892100 | 0.92930800  | 1.44145600  |
| H | -3.28364000 | -0.67886200 | 2.14796600  |
| H | -4.41916700 | -1.35079300 | -1.71465900 |
| O | -5.21200300 | 0.13437000  | -0.50448500 |
| C | 1.59302500  | -1.46055600 | 1.25801400  |
| C | 2.22711500  | -0.21044500 | 1.62314800  |
| C | 3.05842100  | 0.17762400  | 0.54329500  |
| C | 2.99449900  | -0.86999400 | -0.47619600 |
| C | 2.12946600  | -1.89009800 | -0.00973300 |
| C | 1.88118200  | -3.22558500 | -0.64718100 |
| H | 1.98183600  | -3.18336100 | -1.73442400 |
| H | 2.60610700  | -3.96210400 | -0.27541900 |

|    |             |             |             |
|----|-------------|-------------|-------------|
| H  | 0.88407900  | -3.60508000 | -0.41318200 |
| C  | 0.76174200  | -2.31381300 | 2.16940900  |
| H  | -0.03428800 | -2.83163900 | 1.62967400  |
| H  | 1.39507500  | -3.07354100 | 2.64630000  |
| H  | 0.30285400  | -1.72817900 | 2.96964900  |
| C  | 3.84920100  | -0.90638200 | -1.70651000 |
| H  | 3.48950900  | -1.64757800 | -2.42493100 |
| H  | 3.86393800  | 0.06651500  | -2.20461300 |
| H  | 4.88319400  | -1.16903500 | -1.44618400 |
| C  | 3.96756000  | 1.36608800  | 0.47490500  |
| H  | 5.00612100  | 1.06729500  | 0.67025500  |
| H  | 3.93476800  | 1.82651100  | -0.51674000 |
| H  | 3.69788900  | 2.12506000  | 1.21385500  |
| C  | 2.05815100  | 0.49830100  | 2.93483100  |
| H  | 1.03601600  | 0.41561900  | 3.31591600  |
| H  | 2.72028400  | 0.06256600  | 3.69468900  |
| H  | 2.30260600  | 1.56030300  | 2.85376400  |
| Ru | 0.87645800  | 0.11398300  | -0.29103900 |
| Cl | 1.51852900  | 1.64527400  | -2.15402300 |
| H  | -0.89165500 | -0.27422900 | 1.69442900  |
| H  | 0.08249600  | -0.53616700 | -1.49981200 |

**TSA6'-A6''**

|   |             |             |             |
|---|-------------|-------------|-------------|
| C | -0.73428600 | 3.59918200  | 0.25773800  |
| H | -1.08322100 | 4.56780000  | 0.60698800  |
| H | -0.31139200 | 3.53054500  | -0.73731800 |
| C | -0.86162600 | 2.50862400  | 1.03978600  |
| C | -1.41402400 | 2.59476000  | 2.45116600  |
| H | -2.32900800 | 2.00666900  | 2.56819100  |
| H | -0.68831300 | 2.20798000  | 3.17606800  |
| H | -1.63054000 | 3.63460000  | 2.71079700  |
| C | -0.49430400 | 1.17895100  | 0.58478200  |
| C | -1.07235800 | -0.10730600 | 0.67371600  |
| C | -2.40513200 | -0.49623300 | -0.00934400 |
| O | -2.39138000 | -1.90080400 | -0.33186800 |
| C | -2.56193500 | -2.83673500 | 0.72229200  |
| H | -2.29411100 | -3.81470700 | 0.31187700  |
| H | -1.91495300 | -2.63769900 | 1.58464800  |
| H | -3.60037200 | -2.88860200 | 1.07594500  |
| C | -2.63579800 | 0.20444000  | -1.35916600 |
| C | -4.03740900 | -0.06621300 | -1.90747100 |
| C | -4.94281100 | -0.39399300 | 0.23747600  |

|             |             |             |             |   |             |             |             |
|-------------|-------------|-------------|-------------|---|-------------|-------------|-------------|
| C           | -3.59412400 | -0.13110200 | 0.91501800  | H | -0.03804400 | 3.88779200  | -2.16033300 |
| H           | -4.20812000 | 0.51613600  | -2.81819900 | H | 0.48767400  | 2.12308100  | -2.39787700 |
| H           | -2.49754600 | 1.28365700  | -1.23229600 | C | -0.49579900 | 2.55895900  | -0.56276300 |
| H           | -1.88833800 | -0.14032100 | -2.08007900 | C | -1.18012100 | 3.58853700  | 0.31207500  |
| H           | -5.76157600 | -0.04725400 | 0.87632100  | H | -2.25939900 | 3.41104000  | 0.36387100  |
| H           | -5.08670900 | -1.47138100 | 0.06000300  | H | -0.80015200 | 3.55302600  | 1.33881200  |
| H           | -3.53063400 | 0.93736900  | 1.14108200  | H | -1.01972600 | 4.59679100  | -0.07978300 |
| H           | -3.53765600 | -0.66809100 | 1.86806400  | C | -0.44384900 | 1.18306300  | -0.11304800 |
| H           | -4.14357500 | -1.13261100 | -2.15812600 | C | -1.14434700 | 0.32678000  | 0.76320600  |
| O           | -5.05850000 | 0.32042100  | -0.98820500 | C | -2.53482600 | -0.28730400 | 0.47937400  |
| C           | 2.08161300  | -1.84243700 | -0.38530400 | O | -2.68097800 | -1.53966800 | 1.17936900  |
| C           | 1.73713600  | -1.57074700 | 0.99124500  | C | -2.33088200 | -2.75662400 | 0.52951800  |
| C           | 2.45201800  | -0.38953600 | 1.41929500  | H | -2.31651400 | -3.52220600 | 1.31159800  |
| C           | 3.15107600  | 0.11614000  | 0.29557100  | H | -3.06961100 | -3.05466900 | -0.22603700 |
| C           | 2.92152700  | -0.78744600 | -0.83035600 | H | -1.34383600 | -2.72305900 | 0.05750900  |
| C           | 3.60666100  | -0.67582100 | -2.15836400 | C | -2.89365500 | -0.37139800 | -1.01545300 |
| H           | 3.60717800  | 0.35776600  | -2.51312300 | C | -4.37492500 | -0.68974700 | -1.23914700 |
| H           | 4.65075100  | -1.00725200 | -2.08227200 | C | -5.00668600 | 0.21445000  | 0.83490900  |
| H           | 3.11646800  | -1.29208600 | -2.91631600 | C | -3.57530300 | 0.62934000  | 1.17391200  |
| C           | 1.68548300  | -3.07077200 | -1.15135200 | H | -4.61782400 | -0.62099900 | -2.30433600 |
| H           | 1.71726600  | -2.89988200 | -2.22976300 | H | -2.67710300 | 0.60290600  | -1.46789900 |
| H           | 2.36798700  | -3.90027400 | -0.92351500 | H | -2.26361000 | -1.09962500 | -1.53176900 |
| H           | 0.67433500  | -3.39461500 | -0.89260700 | H | -5.72415900 | 0.91558100  | 1.27341900  |
| C           | 4.07908900  | 1.29046400  | 0.26043000  | H | -5.21339400 | -0.78774500 | 1.24058100  |
| H           | 3.86332300  | 1.93246200  | -0.59869800 | H | -3.42065000 | 1.66241300  | 0.84835600  |
| H           | 4.00072000  | 1.89363600  | 1.16831700  | H | -3.42219400 | 0.59034400  | 2.25853900  |
| H           | 5.11923500  | 0.95014000  | 0.17396900  | H | -4.60777200 | -1.71427600 | -0.90957100 |
| C           | 2.48471900  | 0.14528500  | 2.82138800  | O | -5.23390500 | 0.23235100  | -0.57191100 |
| H           | 3.26968700  | -0.35450400 | 3.40473400  | C | 2.23383300  | 0.31558800  | 1.55942000  |
| H           | 2.69278800  | 1.21786100  | 2.84123400  | C | 2.65344700  | 1.16822600  | 0.45632900  |
| H           | 1.53914700  | -0.02524500 | 3.34354800  | C | 3.08611400  | 0.33458500  | -0.59646600 |
| C           | 1.03571700  | -2.52137600 | 1.91252500  | C | 3.02345700  | -1.04550800 | -0.12742200 |
| H           | 0.35316300  | -3.18122300 | 1.37435600  | C | 2.56455900  | -1.04891900 | 1.21355500  |
| H           | 1.77726500  | -3.15343900 | 2.41949600  | C | 2.48968000  | -2.22928900 | 2.13987600  |
| H           | 0.47369800  | -2.00231100 | 2.69438200  | H | 2.34450700  | -3.16477800 | 1.59409500  |
| Ru          | 0.87158000  | 0.16076400  | -0.28033800 | H | 3.42155600  | -2.32315800 | 2.71339100  |
| Cl          | 1.38805400  | 2.02572300  | -1.87015500 | H | 1.67287400  | -2.12947900 | 2.85925500  |
| H           | -0.90788800 | -0.66784500 | 1.59548400  | C | 1.84308600  | 0.79211800  | 2.92819500  |
| H           | 0.07607600  | -0.35552800 | -1.54552300 | H | 1.24352300  | 0.04623000  | 3.45676700  |
| <b>A6''</b> |             |             |             | H | 2.73445900  | 0.98821900  | 3.53914000  |
| C           | 0.02485200  | 2.87588600  | -1.76847300 | H | 1.26709600  | 1.72059900  | 2.88693000  |

|                 |             |             |             |                 |             |             |             |
|-----------------|-------------|-------------|-------------|-----------------|-------------|-------------|-------------|
| C               | 3.51677200  | -2.22452800 | -0.90973900 | H               | -5.28449900 | -0.83731000 | 1.13303500  |
| H               | 3.15715900  | -3.16708400 | -0.48945700 | H               | -3.50770600 | 1.60871800  | 0.65447400  |
| H               | 3.18953100  | -2.17483700 | -1.95113200 | H               | -3.51519400 | 0.59476100  | 2.10717400  |
| H               | 4.61465300  | -2.25319300 | -0.90332000 | H               | -4.64585000 | -1.84955700 | -0.97304300 |
| C               | 3.63868900  | 0.75290900  | -1.92650700 | O               | -5.29710600 | 0.10283000  | -0.72205300 |
| H               | 4.73040500  | 0.63650400  | -1.95262800 | C               | 2.16182600  | 0.32171300  | 1.48714000  |
| H               | 3.22861100  | 0.14311600  | -2.73754100 | C               | 2.58473900  | 1.13122900  | 0.35547100  |
| H               | 3.41433400  | 1.80010100  | -2.14432200 | C               | 3.02935400  | 0.25578000  | -0.66244700 |
| C               | 2.70710600  | 2.66494100  | 0.50247400  | C               | 2.99068300  | -1.10222800 | -0.12710500 |
| H               | 1.92067200  | 3.08326700  | 1.13572200  | C               | 2.50944700  | -1.05727300 | 1.19975200  |
| H               | 3.66784000  | 2.98859200  | 0.92507900  | C               | 2.41204900  | -2.20288800 | 2.16696900  |
| H               | 2.61495900  | 3.11274800  | -0.48980700 | H               | 2.25977700  | -3.15541000 | 1.65287500  |
| Ru              | 0.79050000  | -0.25344200 | -0.08776800 | H               | 3.33458300  | -2.29079100 | 2.75645800  |
| Cl              | 0.34398200  | -1.47616000 | -2.19163600 | H               | 1.58764800  | -2.06760100 | 2.87197300  |
| H               | -1.03172400 | 0.50349900  | 1.83774300  | C               | 1.75550000  | 0.84428800  | 2.83490900  |
| H               | -0.00199100 | -1.43843100 | 0.56199800  | H               | 1.11579500  | 0.13306800  | 3.36495900  |
| <b>TSA6"-A7</b> |             |             |             | H               | 2.63819000  | 1.02117700  | 3.46390100  |
| C               | -0.07984000 | 2.80751300  | -1.92664800 | H               | 1.21516500  | 1.79151300  | 2.75743100  |
| H               | -0.15133900 | 3.81347600  | -2.33214700 | C               | 3.49426700  | -2.30771400 | -0.85969900 |
| H               | 0.39111100  | 2.04935700  | -2.54412100 | H               | 3.16990300  | -3.23620000 | -0.38349500 |
| C               | -0.59452100 | 2.50108100  | -0.71627300 | H               | 3.14286100  | -2.31971800 | -1.89443500 |
| C               | -1.28759500 | 3.53628200  | 0.14519000  | H               | 4.59236800  | -2.30729100 | -0.87781400 |
| H               | -2.36555300 | 3.35179200  | 0.20088100  | C               | 3.61135400  | 0.62738600  | -1.99451800 |
| H               | -0.90653400 | 3.51911300  | 1.17207500  | H               | 4.70925800  | 0.59627100  | -1.96708400 |
| H               | -1.13652400 | 4.54045400  | -0.26075500 | H               | 3.28870600  | -0.06307300 | -2.77945500 |
| C               | -0.51039600 | 1.13164900  | -0.24595400 | H               | 3.31975200  | 1.63709300  | -2.29478100 |
| C               | -1.22071800 | 0.28715400  | 0.65549700  | C               | 2.63679000  | 2.62853900  | 0.33552600  |
| C               | -2.60638900 | -0.34819600 | 0.37334600  | H               | 1.85882800  | 3.07443700  | 0.96001100  |
| O               | -2.74807400 | -1.57181400 | 1.11948400  | H               | 3.60377500  | 2.96999900  | 0.72877700  |
| C               | -2.34680500 | -2.80417400 | 0.52646000  | H               | 2.53066500  | 3.03109400  | -0.67451000 |
| H               | -2.31285700 | -3.53361100 | 1.34162200  | Ru              | 0.74905000  | -0.26810900 | -0.14800600 |
| H               | -3.06889200 | -3.16031200 | -0.22000800 | Cl              | 0.28193100  | -1.73271100 | -2.09281200 |
| H               | -1.35892800 | -2.75478700 | 0.05791600  | H               | -1.14450200 | 0.52232600  | 1.72188900  |
| C               | -2.94693800 | -0.49215600 | -1.12047900 | H               | -0.25722500 | -1.20234300 | 0.65740500  |
| C               | -4.42246500 | -0.83671100 | -1.34310100 | <b>TSA6'-E'</b> |             |             |             |
| C               | -5.08232900 | 0.14791200  | 0.68580200  | Ru              | 1.00523900  | 0.27221800  | 0.00964900  |
| C               | -3.65763500 | 0.58884700  | 1.02050600  | Cl              | 2.47686100  | 2.27006800  | -0.21463800 |
| H               | -4.65659100 | -0.81458100 | -2.41213400 | O               | -2.14147500 | -0.70157300 | -1.29375400 |
| H               | -2.73752500 | 0.46723900  | -1.60670400 | C               | -0.42429000 | 1.51608500  | 0.22679200  |
| H               | -2.30416400 | -1.23271600 | -1.60205100 | C               | -1.09081200 | 0.36994100  | 0.70980400  |
| H               | -5.80868600 | 0.86154100  | 1.08789200  | C               | -2.25752600 | 0.22418400  | -2.36890500 |

|   |             |             |             |           |             |             |             |
|---|-------------|-------------|-------------|-----------|-------------|-------------|-------------|
| H | -1.79040600 | -0.25616200 | -3.23372300 | C         | -4.17430300 | -2.00328800 | 0.41152300  |
| H | -3.30386300 | 0.44066600  | -2.62052800 | H         | -2.82978200 | -1.25293300 | 1.90703200  |
| H | -1.74197100 | 1.17214400  | -2.18572800 | H         | -2.06617400 | -2.30861300 | 0.71629800  |
| C | 2.68204900  | -0.86461300 | 1.07808100  | C         | -4.87947100 | 0.14825100  | -0.20470900 |
| C | 1.48174600  | -1.62024800 | 1.17058700  | H         | -3.57047100 | 1.11434600  | 1.19455800  |
| C | 1.10446300  | -2.02052400 | -0.17810600 | H         | -3.33502100 | 1.64398200  | -0.46630700 |
| C | 2.11525900  | -1.54377400 | -1.08004900 | H         | -4.48466700 | -2.85550200 | 1.02444500  |
| C | 3.08452100  | -0.84735800 | -0.32229900 | H         | -4.14597200 | -2.33143100 | -0.63925800 |
| C | 3.50220700  | -0.31047600 | 2.20304800  | H         | -5.68226600 | 0.86781200  | -0.01361700 |
| H | 3.86587700  | 0.69290900  | 1.96331500  | H         | -4.91420900 | -0.11611300 | -1.27298600 |
| H | 2.92402000  | -0.25047500 | 3.12879600  | O         | -5.17280300 | -1.00012400 | 0.58377300  |
| H | 4.37704000  | -0.94561300 | 2.39629000  | <b>E'</b> |             |             |             |
| C | 0.80385900  | -2.04639700 | 2.43739400  | Ru        | -0.97848100 | 0.05128500  | 0.24190000  |
| H | 0.90132400  | -1.28995200 | 3.22092100  | Cl        | -1.74871200 | 1.18581500  | 2.34456900  |
| H | -0.25943000 | -2.23945000 | 2.28304900  | O         | 2.19127000  | -1.19432500 | 0.84664300  |
| H | 1.25848300  | -2.97159400 | 2.81646100  | C         | 0.58624400  | 1.78165100  | 0.23700600  |
| C | 0.08357800  | -3.05313200 | -0.56084300 | C         | 1.14984600  | 0.72040100  | -0.46856700 |
| H | -0.67819800 | -2.65711800 | -1.23555100 | C         | 1.71360600  | -0.98113800 | 2.16609300  |
| H | 0.58523600  | -3.88757800 | -1.06667800 | H         | 1.64494000  | -1.96883500 | 2.63131300  |
| H | -0.41566600 | -3.46257000 | 0.31922500  | H         | 2.39034400  | -0.36594300 | 2.77273700  |
| C | 2.15530800  | -1.82207000 | -2.55342300 | H         | 0.71556800  | -0.52339700 | 2.18542000  |
| H | 2.68401700  | -1.03641000 | -3.09919500 | C         | -2.57705900 | -0.24485900 | -1.18263000 |
| H | 2.67484200  | -2.76868100 | -2.75313100 | C         | -1.39408400 | -0.88483400 | -1.71351500 |
| H | 1.14856200  | -1.90571300 | -2.97103200 | C         | -0.99733900 | -1.90656800 | -0.78760000 |
| C | 4.38087500  | -0.30439900 | -0.82984000 | C         | -1.96731700 | -1.93452500 | 0.29222300  |
| H | 4.65562900  | 0.61953300  | -0.31880400 | C         | -2.95617200 | -0.94475300 | 0.02769300  |
| H | 5.17572400  | -1.04228800 | -0.65362400 | C         | -3.40377900 | 0.79971600  | -1.86716100 |
| H | 4.34697000  | -0.10388200 | -1.90348100 | H         | -3.87673700 | 1.47383300  | -1.14798900 |
| H | 0.17071700  | 0.89779400  | -1.25905400 | H         | -2.80649900 | 1.40182300  | -2.55521700 |
| H | -1.16087500 | 0.30129700  | 1.79852600  | H         | -4.20399900 | 0.32430300  | -2.45135800 |
| C | -0.73785800 | 2.93281200  | 0.13101800  | C         | -0.79996200 | -0.63351300 | -3.06585000 |
| C | -1.34573900 | 3.53240300  | 1.38407800  | H         | -0.93858500 | 0.40164000  | -3.38677600 |
| H | -2.27770800 | 3.02978000  | 1.66198400  | H         | 0.26880000  | -0.85777300 | -3.09543100 |
| H | -0.65959500 | 3.43343200  | 2.23352700  | H         | -1.29105900 | -1.27286100 | -3.81168300 |
| H | -1.55378300 | 4.59518100  | 1.23531000  | C         | 0.08269500  | -2.92817900 | -0.97679300 |
| C | -0.54532300 | 3.65597300  | -0.98555700 | H         | 0.74230100  | -2.98660900 | -0.10844600 |
| H | -0.84352800 | 4.69978700  | -1.02904200 | H         | -0.36564600 | -3.91745500 | -1.13724100 |
| H | -0.10077300 | 3.22431000  | -1.87544000 | H         | 0.69862200  | -2.70144600 | -1.84935900 |
| C | -2.35566800 | -0.25475200 | 0.05238100  | C         | -1.94655300 | -2.90446900 | 1.43299800  |
| C | -2.79534900 | -1.50748600 | 0.84157000  | H         | -2.46479100 | -2.51076500 | 2.31055000  |
| C | -3.52309400 | 0.76508200  | 0.15733500  | H         | -2.44303200 | -3.84125400 | 1.14601800  |

|   |             |             |             |
|---|-------------|-------------|-------------|
| H | -0.92180000 | -3.15383500 | 1.72189200  |
| C | -4.19558700 | -0.68395200 | 0.82557800  |
| H | -4.44718200 | 0.37863100  | 0.84500100  |
| H | -5.04273100 | -1.22068300 | 0.37754700  |
| H | -4.09205800 | -1.02362400 | 1.85770900  |
| H | 0.84320500  | 1.89417900  | 1.28636000  |
| H | 1.06155600  | 0.74608400  | -1.55053300 |
| C | -0.00147100 | 2.99947600  | -0.36439100 |
| C | -0.10812700 | 3.11339600  | -1.86671800 |
| H | 0.87168100  | 2.99524200  | -2.34568000 |
| H | -0.76315900 | 2.34607900  | -2.28912500 |
| H | -0.50788500 | 4.09009400  | -2.15252400 |
| C | -0.33833800 | 4.03766100  | 0.42521500  |
| H | -0.71506900 | 4.96707700  | 0.00661700  |
| H | -0.25675600 | 3.98019400  | 1.50648100  |
| C | 2.41803800  | -0.04934900 | 0.00326100  |
| C | 3.12262800  | -0.64481600 | -1.23639000 |
| C | 3.42685600  | 0.92940700  | 0.66043500  |
| C | 4.48981100  | -1.23389500 | -0.88836500 |
| H | 3.25614700  | 0.14953100  | -1.97929800 |
| H | 2.49028600  | -1.41792500 | -1.68406300 |
| C | 4.77786900  | 0.25692000  | 0.91295400  |
| H | 3.57310100  | 1.77545900  | -0.02002200 |
| H | 3.03928200  | 1.34257300  | 1.59643100  |
| H | 5.00202000  | -1.57328100 | -1.79442300 |
| H | 4.36736000  | -2.09880600 | -0.21936700 |
| H | 5.49760500  | 0.98418500  | 1.30252800  |
| H | 4.67236300  | -0.54632700 | 1.65896100  |
| O | 5.34526000  | -0.26419600 | -0.28678800 |



**B1**

|   |             |             |             |
|---|-------------|-------------|-------------|
| C | -0.37830700 | -0.60290400 | -2.90394600 |
| C | 0.62947200  | -1.42723900 | -2.36733200 |
| C | 1.01690400  | -2.75132300 | -2.99312400 |
| H | 1.84303500  | -2.58478500 | -3.69666400 |
| H | 1.35689700  | -3.47861200 | -2.25290500 |
| H | 0.18378600  | -3.17310900 | -3.55930500 |
| C | 1.50635400  | -0.90249200 | -1.36940300 |
| C | 2.19499100  | -0.51041100 | -0.43837100 |
| C | 3.12545400  | -0.05047900 | 0.61011600  |
| O | 3.10365800  | 1.36755000  | 0.74451400  |
| C | 4.55226800  | -0.57989600 | 0.29200900  |
| C | 5.50823000  | -0.32521900 | 1.45860000  |
| C | 3.76954100  | -0.35906000 | 3.04492800  |
| C | 2.69882400  | -0.62444300 | 1.98724600  |
| H | 6.47998600  | -0.78493000 | 1.25364100  |
| H | 4.49011200  | -1.65834300 | 0.11071800  |
| H | 4.93074900  | -0.11307000 | -0.62304100 |
| H | 3.49479400  | -0.83629400 | 3.99052700  |
| H | 3.86597300  | 0.72255300  | 3.22291400  |
| H | 2.54559300  | -1.70417900 | 1.88946400  |
| H | 1.74962900  | -0.16656300 | 2.28232100  |
| H | 5.66637100  | 0.75392200  | 1.60003800  |
| O | 5.03006300  | -0.91008900 | 2.66677700  |
| C | -1.51375900 | -2.55466700 | 0.95012900  |
| C | -1.35278000 | -3.30716400 | -0.27244300 |
| C | -2.30367100 | -2.80514200 | -1.22904200 |
| C | -3.00614700 | -1.69862000 | -0.61572000 |
| C | -2.51848300 | -1.57009000 | 0.75135600  |
| C | -3.05663400 | -0.61786600 | 1.77521800  |
| H | -3.27777100 | 0.35463700  | 1.33009300  |
| H | -3.98335700 | -1.00981700 | 2.21474900  |
| H | -2.34493600 | -0.45776500 | 2.58934300  |
| C | -0.75436700 | -2.81210700 | 2.21555400  |
| H | -0.68087700 | -1.91683900 | 2.83754600  |
| H | -1.26318900 | -3.58493100 | 2.80748500  |
| H | 0.25600900  | -3.17508200 | 2.01098500  |
| C | -4.18565500 | -0.97191800 | -1.18740500 |
| H | -4.25150100 | 0.04703300  | -0.79895300 |
| H | -4.13427300 | -0.91503800 | -2.27791000 |
| H | -5.11794600 | -1.49101000 | -0.92507800 |

|    |             |             |             |
|----|-------------|-------------|-------------|
| C  | -2.64454900 | -3.41088500 | -2.55737100 |
| H  | -3.45376500 | -4.14328100 | -2.43462200 |
| H  | -2.99429500 | -2.65665700 | -3.26684000 |
| H  | -1.79702600 | -3.93347100 | -3.00613800 |
| C  | -0.50528700 | -4.53898900 | -0.40557800 |
| H  | 0.50372400  | -4.38935800 | -0.00907000 |
| H  | -0.95434000 | -5.36842800 | 0.15661000  |
| H  | -0.41674100 | -4.86116800 | -1.44440800 |
| Ru | -0.93722900 | -1.15746900 | -0.80158500 |
| Cl | -1.14934800 | 1.30951900  | -0.48209900 |
| H  | -0.32480900 | 0.47676700  | -2.83804300 |
| H  | -0.97949100 | -1.00742800 | -3.71422400 |
| Si | 3.46297600  | 2.66348000  | -0.29035700 |
| C  | 2.92537000  | 2.38102400  | -2.06511500 |
| H  | 3.15448600  | 3.28091800  | -2.65064300 |
| H  | 3.44542000  | 1.54420300  | -2.54300500 |
| H  | 1.84879400  | 2.20324000  | -2.14114500 |
| C  | 2.50659900  | 4.08732700  | 0.46132000  |
| H  | 1.42922400  | 3.88879100  | 0.44581300  |
| H  | 2.79954600  | 4.26429900  | 1.50237900  |
| H  | 2.68303300  | 5.01584300  | -0.09468100 |
| C  | 5.30425300  | 3.04317100  | -0.26158500 |
| H  | 5.50034700  | 3.96676900  | -0.82105300 |
| H  | 5.67478000  | 3.19674900  | 0.75792600  |
| H  | 5.90478700  | 2.25253800  | -0.72468300 |

**B2**

|   |             |             |             |
|---|-------------|-------------|-------------|
| C | -0.57594200 | 3.44555900  | 0.76762800  |
| H | -0.64708600 | 4.36206900  | 1.34740500  |
| H | -0.61085500 | 3.53521200  | -0.31406700 |
| C | -0.47238500 | 2.25156800  | 1.37734000  |
| C | -0.41251600 | 2.12549200  | 2.88213800  |
| H | -1.29172400 | 1.60065900  | 3.26825900  |
| H | 0.46453200  | 1.55169200  | 3.19913300  |
| H | -0.36557500 | 3.11218600  | 3.35167700  |
| C | -0.45352100 | 1.02958100  | 0.58291800  |
| C | -1.06896100 | -0.00144000 | 0.11781500  |
| C | -2.47249400 | -0.55379500 | -0.04398200 |
| O | -3.20676700 | -0.31561300 | 1.16746600  |
| C | -2.51635700 | -2.04427500 | -0.43871800 |
| C | -3.92034500 | -2.48157300 | -0.86455400 |
| C | -4.54109700 | -0.31154100 | -1.50965800 |

|    |             |             |             |           |             |             |             |
|----|-------------|-------------|-------------|-----------|-------------|-------------|-------------|
| C  | -3.17634600 | 0.27261000  | -1.15108800 | H         | -3.93966800 | -3.44430500 | 2.09720300  |
| H  | -3.89347500 | -3.50691800 | -1.24737300 | C         | -1.53440600 | -1.60870100 | 3.27083300  |
| H  | -1.82930300 | -2.19067900 | -1.27443800 | H         | -1.62399200 | -2.07388700 | 4.26083200  |
| H  | -2.16457500 | -2.66755200 | 0.39131200  | H         | -1.08034500 | -2.35126600 | 2.60528600  |
| H  | -4.98124300 | 0.23461000  | -2.35023200 | H         | -0.84147800 | -0.76797900 | 3.36258100  |
| H  | -5.22903500 | -0.22958800 | -0.65310300 | C         | -4.01463100 | 0.18949700  | 3.80437700  |
| H  | -2.53909000 | 0.26989200  | -2.04035400 | H         | -4.07498500 | -0.18635800 | 4.83285400  |
| H  | -3.28367900 | 1.30613600  | -0.80516400 | H         | -3.44956300 | 1.12715900  | 3.82574200  |
| H  | -4.61855200 | -2.45830200 | -0.01596500 | H         | -5.03531200 | 0.42745500  | 3.48293800  |
| O  | -4.43267300 | -1.67160400 | -1.92156800 | <b>B3</b> |             |             |             |
| C  | 2.54733900  | -0.27635400 | 0.70221900  | C         | 0.87981500  | -2.98595600 | -2.01409500 |
| C  | 2.65396900  | 1.07546800  | 0.21377000  | H         | 0.90782700  | -3.74659900 | -2.78944200 |
| C  | 2.87146100  | 1.02171300  | -1.21122400 | H         | 1.52198000  | -3.11019400 | -1.14966200 |
| C  | 2.94284400  | -0.34610100 | -1.59954200 | C         | 0.03532700  | -1.94493700 | -2.11261700 |
| C  | 2.69992200  | -1.16098800 | -0.43474700 | C         | -0.89751400 | -1.77959700 | -3.29659300 |
| C  | 2.77146800  | -2.65575400 | -0.37263500 | H         | -1.94289000 | -1.74950200 | -2.96919200 |
| H  | 2.43097100  | -3.11283400 | -1.30437000 | H         | -0.70123100 | -0.84191500 | -3.82975900 |
| H  | 3.80664800  | -2.98037800 | -0.19932900 | H         | -0.78090600 | -2.60723000 | -4.00222700 |
| H  | 2.15974500  | -3.05084700 | 0.44238800  | C         | -0.07767000 | -0.91024500 | -1.10497500 |
| C  | 2.48825100  | -0.71696300 | 2.13267800  | C         | -0.69657600 | 0.01211700  | -0.50991200 |
| H  | 1.86694400  | -1.60814000 | 2.25305500  | C         | -1.97074700 | 0.80400300  | -0.34362300 |
| H  | 3.49681500  | -0.96627100 | 2.48884100  | O         | -3.09381400 | -0.06503500 | -0.17822400 |
| H  | 2.09021600  | 0.06521200  | 2.78207100  | C         | -2.23495300 | 1.57745400  | -1.66428200 |
| C  | 3.26831600  | -0.85271900 | -2.96903300 | C         | -3.45196300 | 2.49373000  | -1.53611000 |
| H  | 2.79622100  | -1.81635400 | -3.16490000 | C         | -3.15747300 | 2.74612500  | 0.78521300  |
| H  | 2.94852400  | -0.15653700 | -3.74773900 | C         | -1.92696600 | 1.83765900  | 0.80270500  |
| H  | 4.35491600  | -0.98187200 | -3.06176100 | H         | -3.57541100 | 3.09142100  | -2.44487900 |
| C  | 3.08072800  | 2.21158000  | -2.09494000 | H         | -1.35411100 | 2.17986600  | -1.90596400 |
| H  | 4.13834900  | 2.50789800  | -2.08664400 | H         | -2.38946000 | 0.85810200  | -2.47427600 |
| H  | 2.80553300  | 1.99864600  | -3.13058900 | H         | -3.06315900 | 3.52572900  | 1.54775700  |
| H  | 2.49665000  | 3.07037800  | -1.75381200 | H         | -4.06628500 | 2.16595800  | 1.00638400  |
| C  | 2.77956300  | 2.32058400  | 1.03459900  | H         | -1.02953700 | 2.45406900  | 0.68577900  |
| H  | 2.40932400  | 2.18381000  | 2.05154400  | H         | -1.85755900 | 1.32984300  | 1.76985700  |
| H  | 3.83994300  | 2.59723400  | 1.10196700  | H         | -4.36370200 | 1.89425500  | -1.39427800 |
| H  | 2.24616800  | 3.16325000  | 0.58908000  | O         | -3.30095600 | 3.42037500  | -0.46267600 |
| Ru | 0.87497800  | -0.00333600 | -0.65285200 | C         | 2.27057100  | 1.53962100  | -0.82441200 |
| Cl | -0.01584800 | -1.17335300 | -2.64145000 | C         | 2.94186100  | 0.29479200  | -1.13984700 |
| Si | -3.23952500 | -1.09030400 | 2.67247900  | C         | 3.59713100  | -0.16955000 | 0.04617100  |
| C  | -4.34152200 | -2.61674300 | 2.69072900  | C         | 3.30575100  | 0.74526200  | 1.11203200  |
| H  | -4.43264700 | -2.97542500 | 3.72442100  | C         | 2.50103600  | 1.82158200  | 0.55917300  |
| H  | -5.35441700 | -2.40159000 | 2.33347900  | C         | 2.10803800  | 3.07211300  | 1.28933400  |

|                |             |             |             |   |             |             |             |
|----------------|-------------|-------------|-------------|---|-------------|-------------|-------------|
| H              | 1.90124500  | 2.87747200  | 2.34482500  | C | 0.47590900  | 4.12321900  | -0.84921100 |
| H              | 2.92475100  | 3.80468800  | 1.24500700  | H | -0.58213700 | 4.26641800  | -1.09492300 |
| H              | 1.22390500  | 3.53961100  | 0.84916300  | H | 0.56497500  | 4.19852400  | 0.24056200  |
| C              | 1.61530600  | 2.44305800  | -1.82459000 | H | 1.04733000  | 4.93850100  | -1.30185300 |
| H              | 0.93026600  | 3.14668300  | -1.34606300 | C | 0.31322800  | 1.62725400  | -0.76748700 |
| H              | 2.37517300  | 3.03065600  | -2.35666100 | C | -0.65725400 | 0.99186200  | -0.29072200 |
| H              | 1.05702900  | 1.87801700  | -2.57502500 | C | -2.11772200 | 0.86440200  | 0.04697700  |
| C              | 3.90496700  | 0.70761800  | 2.48879300  | O | -2.72392300 | -0.18287300 | -0.69301700 |
| H              | 3.27132600  | 1.21770500  | 3.21905000  | C | -2.81661700 | 2.17684700  | -0.40308900 |
| H              | 4.05544600  | -0.31894600 | 2.83292700  | C | -4.26401200 | 2.22418700  | 0.08460600  |
| H              | 4.88353200  | 1.20593400  | 2.49701000  | C | -3.79918600 | 0.88218100  | 1.96160700  |
| C              | 4.47475100  | -1.37682800 | 0.15731400  | C | -2.32728000 | 0.72294000  | 1.57323600  |
| H              | 5.52943200  | -1.07649500 | 0.10096500  | H | -4.72187300 | 3.18258700  | -0.17876400 |
| H              | 4.32456400  | -1.89389800 | 1.10790000  | H | -2.27330400 | 3.03030800  | 0.01382500  |
| H              | 4.28757600  | -2.08833300 | -0.64990500 | H | -2.78050800 | 2.24475600  | -1.49490800 |
| C              | 3.10975700  | -0.26893600 | -2.51833900 | H | -3.90117600 | 0.88296800  | 3.05122200  |
| H              | 2.25106400  | -0.04481600 | -3.15470500 | H | -4.39745700 | 0.04522900  | 1.57083600  |
| H              | 3.99555400  | 0.17333700  | -2.99412400 | H | -1.74555300 | 1.50722800  | 2.06981000  |
| H              | 3.24547300  | -1.35195400 | -2.50562700 | H | -1.94711900 | -0.24087200 | 1.92378900  |
| Ru             | 1.33137300  | -0.06039100 | 0.45160500  | H | -4.85228300 | 1.42374200  | -0.38876100 |
| Cl             | 1.21455100  | -2.38201700 | 1.45817300  | O | -4.34004500 | 2.11822000  | 1.50493200  |
| H              | 0.16129200  | 0.51924400  | 1.65864300  | C | 2.14015500  | 0.08041300  | 1.91825500  |
| H              | 0.72927300  | 0.12292200  | 2.10770700  | C | 3.03798500  | 0.71910200  | 0.98383000  |
| Si             | -3.51597600 | -1.32714600 | 0.86680600  | C | 3.52079400  | -0.27213800 | 0.09067400  |
| C              | -5.38991500 | -1.34282300 | 0.76564600  | C | 2.97674300  | -1.55875800 | 0.48346000  |
| H              | -5.80631300 | -2.15678100 | 1.37102900  | C | 2.16563300  | -1.34384000 | 1.64467800  |
| H              | -5.82319600 | -0.40448900 | 1.12987200  | C | 1.57427200  | -2.41362800 | 2.51654500  |
| H              | -5.73448400 | -1.48969700 | -0.26442400 | H | 1.31381600  | -3.30639800 | 1.94353400  |
| C              | -2.97309700 | -1.05248900 | 2.64433100  | H | 2.30432100  | -2.71035300 | 3.28075700  |
| H              | -1.88362700 | -1.04319800 | 2.75296300  | H | 0.67727900  | -2.06805100 | 3.03563200  |
| H              | -3.37189800 | -0.12576600 | 3.07059000  | C | 1.54537900  | 0.73148700  | 3.13296100  |
| H              | -3.34789600 | -1.88052400 | 3.25998900  | H | 0.68477200  | 0.17375200  | 3.50890600  |
| C              | -2.83718400 | -2.96850900 | 0.26297700  | H | 2.28677900  | 0.77998800  | 3.94164400  |
| H              | -3.07543800 | -3.14581700 | -0.79167200 | H | 1.22152300  | 1.75487100  | 2.92636800  |
| H              | -1.75210600 | -3.03443000 | 0.38691600  | C | 3.38374200  | -2.87464300 | -0.10836500 |
| H              | -3.28496200 | -3.78767700 | 0.84015500  | H | 2.69619200  | -3.67436000 | 0.17815200  |
| <b>TSB3-B4</b> |             |             |             | H | 3.40614700  | -2.82473000 | -1.20015400 |
| C              | 1.94228500  | 2.67738000  | -2.27297100 | H | 4.38732200  | -3.15903400 | 0.23490600  |
| H              | 2.38995300  | 3.56914500  | -2.70264700 | C | 4.49350400  | -0.07776500 | -1.03085800 |
| H              | 2.27563900  | 1.70938300  | -2.62955800 | H | 5.45711300  | -0.53928100 | -0.77938900 |
| C              | 0.97332000  | 2.78158100  | -1.34815100 | H | 4.12976200  | -0.54779400 | -1.94939400 |

|    |             |             |             |
|----|-------------|-------------|-------------|
| H  | 4.67319900  | 0.98006500  | -1.23432700 |
| C  | 3.44925900  | 2.15892300  | 1.02259100  |
| H  | 2.68773700  | 2.78446700  | 1.49438600  |
| H  | 4.36942200  | 2.26505300  | 1.61243900  |
| H  | 3.64715200  | 2.55686800  | 0.02530700  |
| Ru | 1.14397600  | -0.36483200 | -0.05840100 |
| Cl | 1.27592700  | -0.80335600 | -2.54486900 |
| H  | -0.12549800 | -0.85043500 | 0.74188400  |
| H  | 0.17375600  | -1.60818800 | -0.26373700 |
| Si | -3.14065400 | -1.81558300 | -0.64942500 |
| C  | -5.00277500 | -1.88998900 | -0.89823700 |
| H  | -5.33042900 | -2.92807300 | -1.03590900 |
| H  | -5.55328400 | -1.48568500 | -0.04133600 |
| H  | -5.31057400 | -1.32991800 | -1.78864900 |
| C  | -2.70938600 | -2.71403600 | 0.94478100  |
| H  | -1.63511700 | -2.71700300 | 1.15340000  |
| H  | -3.22973100 | -2.30245400 | 1.81590200  |
| H  | -3.02503900 | -3.76095500 | 0.84779700  |
| C  | -2.29935900 | -2.63930800 | -2.10767500 |
| H  | -2.62500100 | -2.18941400 | -3.05270900 |
| H  | -1.20953400 | -2.54593300 | -2.05819200 |
| H  | -2.54958100 | -3.70660600 | -2.14735500 |

#### B4

|   |             |             |             |
|---|-------------|-------------|-------------|
| C | 0.03346900  | 1.06009800  | -1.21779500 |
| C | -0.79539100 | 0.69243800  | -0.35356900 |
| C | -2.15665800 | 0.74919600  | 0.28136400  |
| C | -2.08443300 | 1.51828300  | 1.62526400  |
| C | -3.09791800 | 1.54841100  | -0.66135300 |
| C | -3.48256600 | 1.81948500  | 2.16635700  |
| C | -4.43576700 | 1.85376600  | 0.01505600  |
| H | -3.41472400 | 2.42865900  | 3.07301900  |
| H | -3.99817100 | 0.88181900  | 2.42309700  |
| H | -5.04655200 | 2.49139500  | -0.63188600 |
| H | -4.99577800 | 0.92476400  | 0.20005700  |
| O | -2.68566600 | -0.53021300 | 0.58602100  |
| C | 0.53253900  | 1.79830500  | -2.36075900 |
| C | 1.20213200  | 1.20454200  | -3.36348400 |
| C | 0.22310800  | 3.28072400  | -2.35245700 |
| H | -0.85892400 | 3.45532000  | -2.33706400 |
| H | 0.63735000  | 3.76488900  | -1.46064500 |
| H | 0.63931900  | 3.76868600  | -3.23820800 |

|    |             |             |             |
|----|-------------|-------------|-------------|
| H  | 1.41183200  | 0.14020700  | -3.34668500 |
| H  | 1.53289500  | 1.78156600  | -4.22247000 |
| O  | -4.25949200 | 2.56894400  | 1.23484200  |
| Ru | 1.16260900  | -0.27216800 | 0.24889200  |
| C  | 3.24642800  | 1.01922500  | 0.12370900  |
| C  | 3.52435600  | -0.32323800 | -0.22112300 |
| C  | 2.59645600  | 1.01983700  | 1.41278500  |
| C  | 3.11558500  | -1.18643900 | 0.88143000  |
| C  | 2.59814500  | -0.34836300 | 1.91540500  |
| C  | 3.40558400  | -2.65436100 | 0.96314900  |
| H  | 4.47143600  | -2.82510100 | 1.16439000  |
| H  | 2.83439600  | -3.13164900 | 1.76286400  |
| H  | 3.15592500  | -3.15492400 | 0.02405300  |
| C  | 2.26879500  | -0.76604000 | 3.31922300  |
| H  | 1.91007700  | -1.79684200 | 3.35911200  |
| H  | 3.16688300  | -0.69822900 | 3.94679800  |
| H  | 1.50381200  | -0.12586700 | 3.76476600  |
| C  | 2.26827600  | 2.24778600  | 2.21039400  |
| H  | 3.17639200  | 2.65186100  | 2.67660300  |
| H  | 1.84469800  | 3.03465200  | 1.58057900  |
| H  | 1.55350200  | 2.03163100  | 3.00737700  |
| C  | 3.59291500  | 2.23326400  | -0.68205200 |
| H  | 4.64420500  | 2.50538800  | -0.52092600 |
| H  | 3.45752100  | 2.06396900  | -1.75317100 |
| H  | 2.98639300  | 3.09476600  | -0.39337200 |
| C  | 4.20211300  | -0.80641100 | -1.46358400 |
| H  | 4.31102300  | -0.00745800 | -2.20028100 |
| H  | 5.20460200  | -1.18383900 | -1.22439600 |
| H  | 3.63678000  | -1.62421800 | -1.92062300 |
| Cl | 0.90215200  | -1.97396700 | -1.60878700 |
| H  | -1.52643800 | 0.92051800  | 2.35320000  |
| H  | -1.54613100 | 2.45942700  | 1.46944400  |
| H  | -2.61011800 | 2.49443800  | -0.91829700 |
| H  | -3.25953400 | 0.99496200  | -1.59050600 |
| H  | 0.24849300  | -1.34874300 | 0.95104500  |
| H  | 0.28382300  | 0.27298800  | 1.42169500  |
| Si | -3.19305400 | -1.89696100 | -0.27959700 |
| C  | -2.21022900 | -3.34538100 | 0.39184200  |
| H  | -2.63073600 | -4.29759300 | 0.04551600  |
| H  | -1.17001000 | -3.29317700 | 0.05449300  |
| H  | -2.21794200 | -3.35957500 | 1.48797300  |

|   |             |             |             |
|---|-------------|-------------|-------------|
| C | -5.01400300 | -2.13601400 | 0.12423800  |
| H | -5.19405500 | -2.11194200 | 1.20523700  |
| H | -5.64114800 | -1.36450500 | -0.33646600 |
| H | -5.36785600 | -3.10698600 | -0.24408500 |
| C | -2.96635400 | -1.75986900 | -2.13716100 |
| H | -3.64528200 | -1.03473800 | -2.59792300 |
| H | -1.93697500 | -1.49557200 | -2.39720100 |
| H | -3.17782600 | -2.73594900 | -2.59278900 |

**TSB4-B5**

|    |             |             |             |
|----|-------------|-------------|-------------|
| C  | -0.64101500 | 1.42007800  | -0.27984100 |
| C  | -1.41582200 | 0.42720300  | -0.15406500 |
| C  | -2.78870500 | -0.18042000 | 0.00288200  |
| C  | -2.95469200 | -0.71865000 | 1.44762600  |
| C  | -3.85726800 | 0.92018400  | -0.21351800 |
| C  | -4.40232200 | -1.12485000 | 1.72380000  |
| C  | -5.25360400 | 0.42237300  | 0.16902500  |
| H  | -4.51918700 | -1.42822900 | 2.76869300  |
| H  | -4.68496300 | -1.97689300 | 1.08709800  |
| H  | -5.97533900 | 1.24183300  | 0.09596300  |
| H  | -5.58064900 | -0.37781300 | -0.51088400 |
| O  | -2.97862400 | -1.29116900 | -0.85810100 |
| C  | -0.40641100 | 2.85252600  | -0.34319100 |
| C  | 0.58253600  | 3.38630200  | -1.08067000 |
| C  | -1.35060600 | 3.71275000  | 0.47164800  |
| H  | -2.37378900 | 3.64964900  | 0.08520700  |
| H  | -1.38058200 | 3.38926500  | 1.51820000  |
| H  | -1.03886000 | 4.76052100  | 0.44162300  |
| H  | 1.23928300  | 2.76337200  | -1.67752900 |
| H  | 0.71842400  | 4.46351200  | -1.12090100 |
| O  | -5.29990200 | -0.03637400 | 1.51719700  |
| Ru | 0.73507300  | -0.32353600 | -0.27896800 |
| C  | 2.26323700  | 0.67528800  | 1.31837100  |
| C  | 2.99154600  | 0.26897600  | 0.17211900  |
| C  | 1.55424100  | -0.47413600 | 1.82808500  |
| C  | 2.78581600  | -1.15709200 | -0.02588600 |
| C  | 1.93654500  | -1.62370800 | 1.03403400  |
| C  | 3.53160400  | -1.99295800 | -1.02297600 |
| H  | 4.55948300  | -2.17264800 | -0.68090400 |
| H  | 3.05501800  | -2.96511400 | -1.16960300 |
| H  | 3.58610300  | -1.49357100 | -1.99359700 |
| C  | 1.62436400  | -3.05628400 | 1.35854800  |

|    |             |             |             |
|----|-------------|-------------|-------------|
| H  | 1.65076100  | -3.68592400 | 0.46632700  |
| H  | 2.36412500  | -3.44956400 | 2.06813800  |
| H  | 0.63811400  | -3.16389500 | 1.81634500  |
| C  | 0.78419200  | -0.51604900 | 3.11553600  |
| H  | 1.47394500  | -0.61168000 | 3.96442100  |
| H  | 0.20062400  | 0.39502700  | 3.27182200  |
| H  | 0.10109200  | -1.36765900 | 3.14972300  |
| C  | 2.26917400  | 2.03967900  | 1.93710400  |
| H  | 3.13348700  | 2.14429100  | 2.60619600  |
| H  | 2.33660000  | 2.82966200  | 1.18530400  |
| H  | 1.37271100  | 2.21516600  | 2.53629600  |
| C  | 3.89268800  | 1.11974200  | -0.66753000 |
| H  | 3.76484300  | 2.18235700  | -0.44922400 |
| H  | 4.94267900  | 0.86353100  | -0.47529800 |
| H  | 3.70101900  | 0.96174000  | -1.73259700 |
| Cl | 1.01210300  | 0.24593900  | -2.72612900 |
| H  | -2.29241300 | -1.57917100 | 1.59065200  |
| H  | -2.65887400 | 0.06329000  | 2.15495200  |
| H  | -3.60751000 | 1.77441400  | 0.42249300  |
| H  | -3.84436400 | 1.26359500  | -1.25191100 |
| H  | 0.27584700  | -1.63116300 | -1.02905000 |
| H  | -0.58879400 | -1.00111900 | 0.28227900  |
| Si | -3.17207300 | -1.55980500 | -2.52251300 |
| C  | -1.99663300 | -2.95721400 | -2.95005200 |
| H  | -2.17868800 | -3.31751000 | -3.96987100 |
| H  | -0.95323800 | -2.63008700 | -2.89370800 |
| H  | -2.12411100 | -3.80866800 | -2.27162300 |
| C  | -4.93853700 | -2.14174200 | -2.79919300 |
| H  | -5.21849100 | -2.92612200 | -2.08672200 |
| H  | -5.66676400 | -1.32846600 | -2.70672300 |
| H  | -5.04696300 | -2.56120400 | -3.80725700 |
| C  | -2.81239800 | -0.05930300 | -3.58586700 |
| H  | -3.55244100 | 0.73889700  | -3.46669900 |
| H  | -1.81729400 | 0.34805700  | -3.38069200 |
| H  | -2.83070100 | -0.36090800 | -4.64132000 |

**B5**

|   |             |             |             |
|---|-------------|-------------|-------------|
| C | -0.11599600 | -1.32464600 | -0.29091300 |
| C | 0.82246700  | -0.56724100 | 0.25761900  |
| C | 2.35655600  | -0.59965000 | 0.35720300  |
| C | 2.78024200  | -1.41670600 | 1.60457800  |
| C | 2.99917600  | -1.23352400 | -0.89534400 |

|    |             |             |             |                |             |             |             |
|----|-------------|-------------|-------------|----------------|-------------|-------------|-------------|
| C  | 4.29700000  | -1.61197900 | 1.64242300  | H              | -4.12853500 | -0.66325200 | -2.16804800 |
| C  | 4.49956600  | -1.46016800 | -0.69981200 | Cl             | -1.13095500 | 0.45084000  | -2.65525400 |
| H  | 4.57904700  | -2.26272400 | 2.47623500  | H              | 2.44607800  | -0.89071000 | 2.50568600  |
| H  | 4.79976300  | -0.64264500 | 1.77961700  | H              | 2.29242000  | -2.39491700 | 1.58255400  |
| H  | 4.91478200  | -2.00871500 | -1.55110400 | H              | 2.51710300  | -2.19538500 | -1.09260100 |
| H  | 5.02748700  | -0.49644900 | -0.62993400 | H              | 2.82225300  | -0.59749600 | -1.76737600 |
| O  | 2.85818400  | 0.71274600  | 0.58340400  | H              | -1.06304400 | 1.87098800  | -0.46210900 |
| C  | -0.22819800 | -2.68766800 | -0.80872800 | H              | 0.45677600  | 0.40871500  | 0.71562300  |
| C  | -0.88142800 | -2.95746100 | -1.95535900 | Si             | 2.97940600  | 2.20119300  | -0.20680000 |
| C  | 0.36566600  | -3.80573200 | 0.02661800  | C              | 1.85168800  | 3.41055100  | 0.68600000  |
| H  | 1.45927600  | -3.75502300 | 0.05306400  | H              | 2.04286500  | 4.43695200  | 0.34933500  |
| H  | 0.01851300  | -3.75255800 | 1.06421600  | H              | 0.79422600  | 3.19299000  | 0.49914800  |
| H  | 0.08418400  | -4.78144300 | -0.38036200 | H              | 2.01737500  | 3.38387100  | 1.76946400  |
| H  | -1.30964400 | -2.16152700 | -2.55417600 | C              | 4.76169300  | 2.74483500  | 0.02422200  |
| H  | -0.96029900 | -3.97831600 | -2.32024500 | H              | 5.04862100  | 2.74580300  | 1.08208900  |
| O  | 4.77138800  | -2.24808200 | 0.45729000  | H              | 5.45982200  | 2.09045600  | -0.50992600 |
| Ru | -1.40317500 | 0.34253600  | -0.15490200 | H              | 4.90898700  | 3.76256700  | -0.35752600 |
| C  | -2.93559400 | -0.96901600 | 1.07100200  | C              | 2.55639300  | 2.15334600  | -2.03453800 |
| C  | -3.50210700 | -0.41427800 | -0.12538300 | H              | 3.29569100  | 1.59372500  | -2.61790200 |
| C  | -2.48184200 | 0.11276200  | 1.89306600  | H              | 1.56806500  | 1.72376200  | -2.23081200 |
| C  | -3.46045300 | 1.03409100  | -0.01341900 | H              | 2.54862000  | 3.18025300  | -2.42274300 |
| C  | -2.82915300 | 1.35328900  | 1.24343600  | <b>TSB5-B6</b> |             |             |             |
| C  | -4.13529600 | 1.98927100  | -0.95145100 | C              | 1.32089000  | 3.25384400  | -1.18549300 |
| H  | -5.21309200 | 2.02661900  | -0.74495600 | H              | 1.46036000  | 4.31008600  | -1.40224400 |
| H  | -3.73766800 | 3.00166000  | -0.84838500 | H              | 1.90725500  | 2.53413500  | -1.74353900 |
| H  | -4.00312000 | 1.68151000  | -1.99117500 | C              | 0.40241100  | 2.85524500  | -0.27809900 |
| C  | -2.70336300 | 2.71610400  | 1.86032200  | C              | -0.40438400 | 3.88540700  | 0.49014400  |
| H  | -2.69978000 | 3.50261800  | 1.10301600  | H              | -1.46408900 | 3.86327400  | 0.21756700  |
| H  | -3.55004500 | 2.90211000  | 2.53413000  | H              | -0.34253200 | 3.71029900  | 1.56943100  |
| H  | -1.78793000 | 2.81107700  | 2.44980900  | H              | -0.02987700 | 4.89229800  | 0.28512200  |
| C  | -1.85027800 | -0.01524700 | 3.24630200  | C              | 0.27070400  | 1.44417700  | 0.06920200  |
| H  | -2.62158200 | -0.05834400 | 4.02640000  | C              | -0.70882500 | 0.68390400  | 0.65736700  |
| H  | -1.25004700 | -0.92516800 | 3.32842800  | C              | -2.23226100 | 0.69341800  | 0.43270000  |
| H  | -1.20585400 | 0.83868300  | 3.47077300  | O              | -2.70706000 | -0.63863600 | 0.60935000  |
| C  | -2.91182300 | -2.42330200 | 1.42604600  | C              | -2.64756300 | 1.27647600  | -0.93101100 |
| H  | -3.89191300 | -2.71938500 | 1.82273200  | C              | -4.16232200 | 1.46808600  | -1.02940800 |
| H  | -2.70959700 | -3.04966200 | 0.55399500  | C              | -4.41087700 | 1.66793900  | 1.30408200  |
| H  | -2.16725300 | -2.64264400 | 2.19431700  | C              | -2.91063100 | 1.51580200  | 1.56007300  |
| C  | -4.18657300 | -1.18574600 | -1.21119500 | H              | -4.41886000 | 1.99047800  | -1.95630700 |
| H  | -3.74631400 | -2.17802300 | -1.33687400 | H              | -2.16779800 | 2.25085000  | -1.05885300 |
| H  | -5.24864300 | -1.32115600 | -0.96588300 | H              | -2.28985500 | 0.63437900  | -1.74017400 |

|    |             |             |             |
|----|-------------|-------------|-------------|
| H  | -4.86229600 | 2.32502200  | 2.05427300  |
| H  | -4.90972900 | 0.68856400  | 1.36435900  |
| H  | -2.45898900 | 2.50870700  | 1.61424100  |
| H  | -2.74166000 | 1.01274800  | 2.51859400  |
| H  | -4.68064500 | 0.49672800  | -1.03915400 |
| O  | -4.66469200 | 2.27129600  | 0.03687000  |
| C  | 2.21831800  | -0.78150100 | 1.79169700  |
| C  | 2.89874900  | 0.40587100  | 1.34338500  |
| C  | 3.52461900  | 0.11148200  | 0.09112100  |
| C  | 3.27527500  | -1.28818400 | -0.21573700 |
| C  | 2.49139000  | -1.83883400 | 0.85127100  |
| C  | 2.14288400  | -3.28547700 | 1.04334600  |
| H  | 2.06418000  | -3.81312100 | 0.09060100  |
| H  | 2.92410000  | -3.78076000 | 1.63531000  |
| H  | 1.19933900  | -3.40888600 | 1.57983500  |
| C  | 1.49694600  | -0.93289300 | 3.09738700  |
| H  | 0.78124000  | -1.75858500 | 3.06711500  |
| H  | 2.20632300  | -1.14040200 | 3.90900500  |
| H  | 0.95314700  | -0.02348600 | 3.36996100  |
| C  | 3.89746200  | -2.03877000 | -1.35509700 |
| H  | 3.37608900  | -2.97971800 | -1.54780700 |
| H  | 3.87587100  | -1.44973100 | -2.27529000 |
| H  | 4.94599500  | -2.27625000 | -1.13120200 |
| C  | 4.41590900  | 1.01880700  | -0.69983800 |
| H  | 5.46935500  | 0.82387800  | -0.45786400 |
| H  | 4.28517900  | 0.86093800  | -1.77303900 |
| H  | 4.21690400  | 2.07152000  | -0.48412400 |
| C  | 3.00708000  | 1.69534200  | 2.10112700  |
| H  | 2.16119800  | 1.84415800  | 2.77666800  |
| H  | 3.91876400  | 1.69208000  | 2.71302900  |
| H  | 3.06551900  | 2.55764800  | 1.43235300  |
| Ru | 1.32275100  | -0.21963700 | -0.27885000 |
| Cl | 1.40052900  | 0.29927400  | -2.74815500 |
| H  | -0.44042100 | -0.03236600 | 1.43355100  |
| H  | 0.61142800  | -1.49187000 | -0.94764300 |
| Si | -2.98431400 | -2.08169200 | -0.21485500 |
| C  | -4.79412600 | -2.50244700 | 0.07118200  |
| H  | -5.46723500 | -1.80720300 | -0.44277900 |
| H  | -5.01764800 | -3.50942800 | -0.30255000 |
| H  | -5.04627500 | -2.48536300 | 1.13773800  |
| C  | -2.63321500 | -2.04170000 | -2.05851200 |

|   |             |             |             |
|---|-------------|-------------|-------------|
| H | -2.78251100 | -3.05043600 | -2.46554100 |
| H | -3.30460100 | -1.37078000 | -2.60421800 |
| H | -1.60118500 | -1.75066100 | -2.27893300 |
| C | -1.91942000 | -3.39510800 | 0.60009900  |
| H | -2.04145900 | -3.39161000 | 1.68952900  |
| H | -2.19009000 | -4.39540800 | 0.24071800  |
| H | -0.85968000 | -3.23626900 | 0.37646400  |

## B6

|   |             |             |             |
|---|-------------|-------------|-------------|
| C | -1.58414700 | 3.32955300  | 1.02630500  |
| H | -1.89053100 | 4.35817900  | 1.19836600  |
| H | -1.84952100 | 2.58998600  | 1.77478500  |
| C | -0.84821000 | 2.98845100  | -0.05579700 |
| C | -0.42389900 | 4.00169200  | -1.09727300 |
| H | 0.65279100  | 4.19521500  | -1.04795000 |
| H | -0.63947500 | 3.64378700  | -2.10974300 |
| H | -0.94679400 | 4.95055400  | -0.94833300 |
| C | -0.41894500 | 1.61369900  | -0.18379500 |
| C | 0.57934300  | 0.84198600  | -0.81335600 |
| C | 2.05789500  | 0.79817800  | -0.37393000 |
| O | 2.62833300  | -0.44932800 | -0.75941800 |
| C | 2.26072100  | 1.11999100  | 1.11709400  |
| C | 3.73472500  | 1.33381600  | 1.46561300  |
| C | 4.26901800  | 2.00810000  | -0.72613000 |
| C | 2.82155300  | 1.87003800  | -1.19847700 |
| H | 3.83217200  | 1.67087300  | 2.50241500  |
| H | 1.72111300  | 2.04780900  | 1.34012800  |
| H | 1.82010800  | 0.34196200  | 1.74357300  |
| H | 4.77391200  | 2.81672000  | -1.26445300 |
| H | 4.82130500  | 1.07529300  | -0.91722100 |
| H | 2.32340700  | 2.83793000  | -1.08569700 |
| H | 2.79703800  | 1.59642800  | -2.25934100 |
| H | 4.30313500  | 0.39631200  | 1.36766800  |
| O | 4.33574500  | 2.34483100  | 0.65772700  |
| C | -2.43793800 | -0.48854100 | -1.62712100 |
| C | -3.29141600 | 0.35183000  | -0.80012400 |
| C | -3.52864900 | -0.33692300 | 0.40480800  |
| C | -2.89273600 | -1.65050500 | 0.31185700  |
| C | -2.29079500 | -1.76521600 | -0.96767000 |
| C | -1.70084300 | -3.00008900 | -1.58345800 |
| H | -1.33102300 | -3.69488800 | -0.82586600 |
| H | -2.46395800 | -3.52910500 | -2.17047000 |

|                |             |             |             |   |             |             |             |
|----------------|-------------|-------------|-------------|---|-------------|-------------|-------------|
| H              | -0.87674000 | -2.76364000 | -2.26076000 | H | -0.67761200 | 3.27353200  | 1.69469500  |
| C              | -2.05212200 | -0.19746400 | -3.04820400 | H | -1.20708700 | 4.45738500  | 0.48434600  |
| H              | -1.14032000 | -0.72787100 | -3.33636200 | C | -0.60542300 | 1.09259600  | -0.10692200 |
| H              | -2.84650400 | -0.51462700 | -3.73703100 | C | -1.28585200 | 0.11092800  | 0.67078100  |
| H              | -1.88823200 | 0.87118000  | -3.21429700 | C | -2.67599000 | -0.47319600 | 0.32587800  |
| C              | -3.02688300 | -2.72688800 | 1.34753200  | O | -2.86885300 | -1.69193900 | 1.03446100  |
| H              | -2.29008100 | -3.52106400 | 1.20098500  | C | -2.95497200 | -0.60801600 | -1.18032100 |
| H              | -2.89075200 | -2.32476300 | 2.35517800  | C | -4.41992100 | -0.95285000 | -1.45618600 |
| H              | -4.02345800 | -3.18635300 | 1.30352900  | C | -5.14955300 | 0.06725400  | 0.53786100  |
| C              | -4.35322200 | 0.11634900  | 1.57108100  | C | -3.73232900 | 0.50508500  | 0.90830200  |
| H              | -5.29884200 | -0.43928200 | 1.62018900  | H | -4.61456000 | -0.93832100 | -2.53317200 |
| H              | -3.82424800 | -0.05381800 | 2.51403600  | H | -2.72783100 | 0.35320500  | -1.65546100 |
| H              | -4.59732400 | 1.17967800  | 1.50605700  | H | -2.29255400 | -1.34672600 | -1.63418800 |
| C              | -3.85743400 | 1.67706100  | -1.21347100 | H | -5.88199700 | 0.79712000  | 0.89758300  |
| H              | -3.17148900 | 2.22920300  | -1.86115200 | H | -5.37812400 | -0.90399900 | 1.00278200  |
| H              | -4.78742300 | 1.53142100  | -1.77934000 | H | -3.56056000 | 1.50574400  | 0.50140700  |
| H              | -4.09059300 | 2.31050300  | -0.35396900 | H | -3.62760300 | 0.55376800  | 1.99801800  |
| Ru             | -1.11839300 | -0.10516900 | 0.19448200  | H | -4.65699000 | -1.96343300 | -1.08903600 |
| Cl             | -0.78101000 | -0.20677300 | 2.63774800  | O | -5.31770200 | -0.00799700 | -0.87536800 |
| H              | 0.49557500  | 0.68023200  | -1.89262700 | C | 2.16749000  | 0.23942000  | 1.32326800  |
| H              | 0.14572500  | -1.04091600 | 0.18280000  | C | 2.56344800  | 1.05928800  | 0.19052900  |
| Si             | 3.07499900  | -1.96625600 | -0.19106300 | C | 2.92304600  | 0.18760600  | -0.86101200 |
| C              | 4.92638200  | -2.13658300 | -0.48287500 | C | 2.88063100  | -1.18270400 | -0.34739700 |
| H              | 5.51434200  | -1.46318600 | 0.15073000  | C | 2.46320400  | -1.14382700 | 0.99860400  |
| H              | 5.25530700  | -3.15976100 | -0.26182700 | C | 2.40172400  | -2.29104200 | 1.96421600  |
| H              | 5.18927200  | -1.92740800 | -1.52629700 | H | 2.26307500  | -3.24637100 | 1.45246500  |
| C              | 2.70012400  | -2.30333500 | 1.61903500  | H | 3.33687800  | -2.35678800 | 2.53673500  |
| H              | 2.92033500  | -3.35773100 | 1.83140000  | H | 1.58944300  | -2.17249400 | 2.68559600  |
| H              | 3.31562200  | -1.70205000 | 2.29615700  | C | 1.84058200  | 0.74712900  | 2.69786100  |
| H              | 1.64897800  | -2.12796800 | 1.86831000  | H | 1.21933500  | 0.03811600  | 3.25222100  |
| C              | 2.19261700  | -3.23711300 | -1.25492300 | H | 2.75814400  | 0.90136100  | 3.28150300  |
| H              | 2.27043200  | -2.99425100 | -2.32100800 | H | 1.31193200  | 1.70359800  | 2.66257500  |
| H              | 2.62955600  | -4.23307500 | -1.11139200 | C | 3.31668400  | -2.38648900 | -1.12563200 |
| H              | 1.13022800  | -3.30389300 | -1.00196800 | H | 3.06150900  | -3.31450000 | -0.60772200 |
| <b>TSB6-B7</b> |             |             |             | H | 2.84487000  | -2.41033600 | -2.11195500 |
| C              | -0.33438500 | 3.02021000  | -1.53031400 | H | 4.40452800  | -2.37528900 | -1.27405100 |
| H              | -0.43721900 | 4.07794900  | -1.75859100 | C | 3.42354500  | 0.55897600  | -2.22392100 |
| H              | 0.05187500  | 2.37223300  | -2.31064200 | H | 4.50990100  | 0.41600400  | -2.29481200 |
| C              | -0.70935700 | 2.52247100  | -0.33345900 | H | 2.95895800  | -0.06357100 | -2.99469500 |
| C              | -1.25393200 | 3.40324900  | 0.77139700  | H | 3.21077800  | 1.60487100  | -2.45924500 |
| H              | -2.29324800 | 3.15687300  | 1.01007600  | C | 2.65720000  | 2.55525500  | 0.19326800  |



|    |             |             |             |
|----|-------------|-------------|-------------|
| H  | 1.91567100  | 3.01125100  | 0.85324800  |
| H  | 3.64694100  | 2.86490300  | 0.55549800  |
| H  | 2.52477200  | 2.97919500  | -0.80517300 |
| Ru | 0.66446500  | -0.28894100 | -0.27911300 |
| Cl | 0.23524200  | -1.41019400 | -2.44725200 |
| H  | -1.18355400 | 0.17467400  | 1.75919400  |
| H  | -0.35031500 | -1.35791900 | 0.34542000  |
| Si | -2.64164400 | -3.35667300 | 0.94514900  |
| C  | -4.26321100 | -4.09976400 | 1.53714000  |
| H  | -5.07834900 | -3.92245500 | 0.82651500  |
| H  | -4.17172600 | -5.18526500 | 1.66580700  |
| H  | -4.56639800 | -3.67931600 | 2.50293400  |
| C  | -2.22407200 | -4.02335300 | -0.75811000 |
| H  | -2.03241300 | -5.10154200 | -0.67757400 |
| H  | -3.04319500 | -3.89345100 | -1.47353000 |
| H  | -1.32726600 | -3.55900000 | -1.18021400 |
| C  | -1.27775500 | -3.82292900 | 2.14848900  |
| H  | -1.42280600 | -3.34679300 | 3.12523400  |
| H  | -1.25637600 | -4.90763800 | 2.31080500  |
| H  | -0.29307000 | -3.52714000 | 1.77237500  |

## B7

|   |             |             |             |
|---|-------------|-------------|-------------|
| C | -0.87605200 | 3.29925600  | -0.79123700 |
| H | -0.96186500 | 4.25055800  | -1.31128400 |
| H | -1.23361200 | 3.25614000  | 0.23238100  |
| C | -0.30013000 | 2.23090200  | -1.37944500 |
| C | 0.20574800  | 2.31143700  | -2.80872000 |
| H | 1.29726600  | 2.26573200  | -2.86284200 |
| H | -0.17834500 | 1.48117400  | -3.41140500 |
| H | -0.11667500 | 3.24647500  | -3.27552900 |
| C | -0.16437400 | 0.96727800  | -0.63481700 |
| C | 1.12257600  | 0.16079400  | -0.77364200 |
| C | 2.43552400  | 0.66315300  | -0.08106000 |
| O | 3.47889700  | -0.28382200 | -0.34614500 |
| C | 2.25596700  | 0.82958400  | 1.43891800  |
| C | 3.51179500  | 1.40317600  | 2.09584300  |
| C | 4.17171700  | 2.50074400  | 0.11814900  |
| C | 2.94744600  | 1.99973900  | -0.65235900 |
| H | 3.32813300  | 1.60884500  | 3.15515500  |
| H | 1.41212800  | 1.50043600  | 1.62394100  |
| H | 2.00320100  | -0.13069500 | 1.89897800  |
| H | 4.47091900  | 3.49089800  | -0.24079300 |

|    |             |             |             |
|----|-------------|-------------|-------------|
| H  | 5.01880400  | 1.81400700  | -0.03158400 |
| H  | 2.15691400  | 2.75288500  | -0.58340200 |
| H  | 3.21062100  | 1.87100200  | -1.70817300 |
| H  | 4.34271200  | 0.68311200  | 2.02999100  |
| O  | 3.89706200  | 2.64600200  | 1.50949000  |
| C  | -2.53773300 | -1.29444200 | -1.15239100 |
| C  | -3.04006300 | 0.04497200  | -1.28616100 |
| C  | -3.63654100 | 0.39716000  | -0.01916600 |
| C  | -3.73041600 | -0.82467600 | 0.78807000  |
| C  | -3.03811800 | -1.83506400 | 0.12176500  |
| C  | -2.79887100 | -3.24233800 | 0.57811400  |
| H  | -3.05266500 | -3.37804900 | 1.63187800  |
| H  | -3.40366600 | -3.94709500 | -0.00722300 |
| H  | -1.75154900 | -3.53287400 | 0.44349700  |
| C  | -1.90528900 | -2.12794500 | -2.22811200 |
| H  | -1.20586200 | -2.85714500 | -1.80826800 |
| H  | -2.66605100 | -2.69083500 | -2.78617800 |
| H  | -1.35718900 | -1.51046700 | -2.94425500 |
| C  | -4.39491900 | -0.89115500 | 2.12799100  |
| H  | -4.27997700 | -1.87509400 | 2.58917100  |
| H  | -3.97827900 | -0.14759200 | 2.81500600  |
| H  | -5.46920700 | -0.68918000 | 2.03260100  |
| C  | -4.36957900 | 1.67033300  | 0.27721100  |
| H  | -5.42153800 | 1.58682400  | -0.03062600 |
| H  | -4.35650000 | 1.90018400  | 1.34598800  |
| H  | -3.93397600 | 2.51740100  | -0.25861100 |
| C  | -3.09114900 | 0.87046300  | -2.53427900 |
| H  | -2.34720600 | 0.54647000  | -3.26552800 |
| H  | -4.07944500 | 0.76677900  | -3.00204000 |
| H  | -2.93328100 | 1.93268300  | -2.33270600 |
| Ru | -1.51201400 | 0.00276400  | 0.28392500  |
| Cl | -1.11205500 | 0.49775100  | 2.64648300  |
| H  | 1.35242800  | 0.03395600  | -1.84131300 |
| H  | 0.93955000  | -0.84459800 | -0.36970900 |
| Si | 3.64628500  | -1.95952900 | -0.32701300 |
| C  | 5.50033300  | -2.22391300 | -0.21829900 |
| H  | 5.90998500  | -1.82577900 | 0.71690400  |
| H  | 5.74398900  | -3.29234900 | -0.25653400 |
| H  | 6.02598700  | -1.73532800 | -1.04645500 |
| C  | 2.79702900  | -2.78829200 | 1.13221700  |
| H  | 2.98891600  | -3.86855900 | 1.09901500  |

|   |            |             |             |
|---|------------|-------------|-------------|
| H | 3.17377700 | -2.42108800 | 2.09300100  |
| H | 1.70979200 | -2.65334300 | 1.12185300  |
| C | 3.00200900 | -2.70861800 | -1.92853900 |
| H | 3.39349300 | -2.17955200 | -2.80504400 |
| H | 3.31623200 | -3.75654600 | -2.01174500 |
| H | 1.90848800 | -2.69207500 | -1.98990500 |

**B8**

|    |             |             |             |
|----|-------------|-------------|-------------|
| C  | 0.17677700  | -0.61134300 | -0.24888800 |
| C  | 1.17904800  | -1.03857900 | 0.76967700  |
| C  | 2.70317600  | -0.86238900 | 0.47781800  |
| C  | 3.47957000  | -1.68998200 | 1.53289500  |
| C  | 3.12044100  | -1.37095600 | -0.91609600 |
| C  | 4.97931200  | -1.69044900 | 1.24583800  |
| C  | 4.64273600  | -1.41824200 | -1.07018200 |
| H  | 5.50845600  | -2.33671400 | 1.95337100  |
| H  | 5.38395600  | -0.67164300 | 1.34556100  |
| H  | 4.91378400  | -1.88013100 | -2.02482700 |
| H  | 5.06267000  | -0.40035800 | -1.05964500 |
| O  | 3.10370200  | 0.48582300  | 0.69085300  |
| C  | -0.16370500 | -1.23282200 | -1.49670900 |
| C  | -0.80838600 | -0.38174300 | -2.41796000 |
| C  | -0.15643400 | -2.73550300 | -1.69766400 |
| H  | 0.69275300  | -3.00994400 | -2.33437900 |
| H  | -0.06584000 | -3.28985600 | -0.76081300 |
| H  | -1.06604100 | -3.06214200 | -2.21186500 |
| H  | -0.43741500 | 0.61641400  | -2.61340000 |
| H  | -1.39823700 | -0.83334000 | -3.21451700 |
| O  | 5.25942500  | -2.20631200 | -0.05498300 |
| Ru | -1.61037400 | 0.02757100  | -0.33776500 |
| C  | -2.90480200 | -1.48716800 | 0.66900800  |
| C  | -3.86962200 | -0.75139100 | -0.14247300 |
| C  | -2.41333700 | -0.60610000 | 1.70416600  |
| C  | -3.88863300 | 0.57081900  | 0.31733600  |
| C  | -2.93041600 | 0.68825900  | 1.42456900  |
| C  | -4.74183000 | 1.69738700  | -0.17403000 |
| H  | -5.48580300 | 1.97120000  | 0.58538400  |
| H  | -4.13645400 | 2.58464400  | -0.38285300 |
| H  | -5.28041800 | 1.42980000  | -1.08657200 |
| C  | -2.75140600 | 1.92395400  | 2.25285600  |
| H  | -2.64884900 | 2.80883700  | 1.61886600  |
| H  | -3.61901200 | 2.07998800  | 2.90795900  |

|    |             |             |             |
|----|-------------|-------------|-------------|
| H  | -1.86375300 | 1.85731100  | 2.88725500  |
| C  | -1.61182800 | -1.00312200 | 2.90839600  |
| H  | -2.28196100 | -1.23964400 | 3.74581700  |
| H  | -1.00265100 | -1.88979700 | 2.72024700  |
| H  | -0.94915900 | -0.19887400 | 3.23845700  |
| C  | -2.75143800 | -2.98017200 | 0.64117200  |
| H  | -3.57277500 | -3.45052900 | 1.19868400  |
| H  | -2.78490200 | -3.37390600 | -0.37750900 |
| H  | -1.81613900 | -3.30645600 | 1.10261100  |
| C  | -4.70217900 | -1.35779900 | -1.23316900 |
| H  | -4.12179600 | -2.06139000 | -1.83729700 |
| H  | -5.54891400 | -1.91545100 | -0.81115400 |
| H  | -5.10777300 | -0.59677100 | -1.90432700 |
| Cl | -1.49124100 | 2.39534500  | -1.07444600 |
| H  | 3.28844600  | -1.27637500 | 2.52976800  |
| H  | 3.11749000  | -2.72430900 | 1.52055500  |
| H  | 2.72515300  | -2.38460500 | -1.04740600 |
| H  | 2.68920400  | -0.74625700 | -1.70315100 |
| H  | 0.98002600  | -0.54367400 | 1.72408200  |
| H  | 1.01634700  | -2.11602800 | 0.92479500  |
| Si | 3.08591300  | 2.01844600  | 0.00234700  |
| C  | 4.79908200  | 2.71933000  | 0.32825300  |
| H  | 4.86357700  | 3.75919400  | -0.01488400 |
| H  | 5.04025700  | 2.71107900  | 1.39754200  |
| H  | 5.57910600  | 2.15256100  | -0.19277500 |
| C  | 1.81426100  | 3.05856400  | 0.90722800  |
| H  | 1.90207900  | 4.11348100  | 0.61846100  |
| H  | 0.79151800  | 2.74113500  | 0.67683000  |
| H  | 1.95838800  | 3.00196900  | 1.99261000  |
| C  | 2.75307200  | 2.03685700  | -1.84666800 |
| H  | 1.78914100  | 1.58800700  | -2.10611100 |
| H  | 3.53602500  | 1.52251700  | -2.41462600 |
| H  | 2.72855000  | 3.07726600  | -2.19555300 |

**TSB8-B9**

|   |            |             |             |
|---|------------|-------------|-------------|
| C | 0.45863400 | 0.02919100  | -0.42297400 |
| C | 1.36585800 | -0.57537600 | 0.62512600  |
| C | 2.89775600 | -0.73754800 | 0.41914900  |
| C | 3.46225200 | -1.56097000 | 1.59823800  |
| C | 3.28600200 | -1.45691500 | -0.88785300 |
| C | 4.95315300 | -1.84549200 | 1.41497500  |
| C | 4.78838600 | -1.74567300 | -0.93479500 |

|    |             |             |             |           |             |             |             |
|----|-------------|-------------|-------------|-----------|-------------|-------------|-------------|
| H  | 5.32191100  | -2.50211100 | 2.20933600  | H         | 3.29943200  | -1.01785900 | 2.53644600  |
| H  | 5.52273200  | -0.90484600 | 1.45757600  | H         | 2.92228800  | -2.51307900 | 1.66117200  |
| H  | 5.03898100  | -2.33091800 | -1.82521100 | H         | 2.74480200  | -2.40703000 | -0.94422200 |
| H  | 5.35364900  | -0.80212800 | -0.97742700 | H         | 2.99949300  | -0.85866000 | -1.75928700 |
| O  | 3.57475200  | 0.53066100  | 0.47211400  | H         | 1.23445100  | -0.01487500 | 1.55795100  |
| C  | -0.16651100 | -0.64539000 | -1.53811100 | H         | 0.95820300  | -1.57361600 | 0.81590600  |
| C  | -1.04058300 | 0.13929800  | -2.34258600 | Si        | 3.03948400  | 2.02682400  | -0.06105300 |
| C  | 0.01876800  | -2.11833600 | -1.82360200 | C         | 4.43062200  | 2.82914000  | -1.02330900 |
| H  | 0.83558300  | -2.25542500 | -2.54317400 | H         | 4.14970700  | 3.83487500  | -1.35655700 |
| H  | 0.25629400  | -2.70783000 | -0.93626500 | H         | 5.32717400  | 2.92719200  | -0.39938900 |
| H  | -0.88534000 | -2.53108600 | -2.28011100 | H         | 4.70118100  | 2.24455700  | -1.90911000 |
| H  | -0.80911400 | 1.17018400  | -2.58976900 | C         | 2.52243700  | 3.09836000  | 1.38283800  |
| H  | -1.63120100 | -0.38498900 | -3.09204900 | H         | 2.15951300  | 4.07277000  | 1.03455200  |
| O  | 5.21160600  | -2.52093500 | 0.18492900  | H         | 1.72019900  | 2.63460800  | 1.96744500  |
| Ru | -1.68790300 | 0.20863500  | -0.24462800 | H         | 3.36506600  | 3.28256600  | 2.05905100  |
| C  | -2.47750800 | -1.63726700 | 0.80109600  | C         | 1.58579500  | 1.71631600  | -1.20328000 |
| C  | -3.45199900 | -1.17041100 | -0.16133100 | H         | 0.50724000  | 1.23128800  | -0.49843800 |
| C  | -2.34672100 | -0.63695000 | 1.83335100  | H         | 1.80359800  | 1.16407300  | -2.11377000 |
| C  | -3.87089500 | 0.13427600  | 0.24121300  | H         | 0.95087400  | 2.57594400  | -1.43231900 |
| C  | -3.17601400 | 0.46037400  | 1.48083000  | <b>B9</b> |             |             |             |
| C  | -4.95108900 | 0.96605400  | -0.38460500 | C         | 0.76585400  | 0.20456400  | -0.38538200 |
| H  | -5.90860600 | 0.82387900  | 0.13601300  | C         | 1.66583600  | -0.63710500 | 0.57505300  |
| H  | -4.70622900 | 2.03083300  | -0.34240800 | C         | 3.19764400  | -0.65110800 | 0.35041300  |
| H  | -5.10468000 | 0.70050000  | -1.43435700 | C         | 3.85305300  | -1.49221200 | 1.46840400  |
| C  | -3.42493600 | 1.69160900  | 2.29913500  | C         | 3.63000000  | -1.25419800 | -1.00370900 |
| H  | -3.47687900 | 2.58217400  | 1.66818200  | C         | 5.35973200  | -1.63125200 | 1.25338400  |
| H  | -4.37681000 | 1.60487500  | 2.84026300  | C         | 5.15048300  | -1.40704900 | -1.08344600 |
| H  | -2.63759400 | 1.85136800  | 3.04097800  | H         | 5.79806300  | -2.29787100 | 2.00297800  |
| C  | -1.53678200 | -0.78182000 | 3.08799100  | H         | 5.84455200  | -0.64747100 | 1.34623800  |
| H  | -2.12645700 | -1.27255700 | 3.87436200  | H         | 5.43889400  | -1.91302700 | -2.01040700 |
| H  | -0.64510500 | -1.39302800 | 2.92577800  | H         | 5.63008200  | -0.41616000 | -1.07310500 |
| H  | -1.21419700 | 0.18769600  | 3.47708200  | O         | 3.75357900  | 0.67459000  | 0.47344700  |
| C  | -1.92486700 | -3.03107800 | 0.88346300  | C         | -0.07654500 | -0.57509100 | -1.39926100 |
| H  | -2.56285100 | -3.65198800 | 1.52736800  | C         | -0.90228200 | 0.14820500  | -2.27348800 |
| H  | -1.88556300 | -3.51475300 | -0.09440200 | C         | 0.16884800  | -2.04074900 | -1.67689900 |
| H  | -0.91932400 | -3.05056700 | 1.31403200  | H         | 1.09070200  | -2.14936900 | -2.26328800 |
| C  | -4.01910600 | -1.96833700 | -1.29959600 | H         | 0.27730500  | -2.65897200 | -0.78542500 |
| H  | -3.29369900 | -2.67945700 | -1.70399300 | H         | -0.64458100 | -2.44982700 | -2.28038100 |
| H  | -4.89038600 | -2.54820200 | -0.96555600 | H         | -0.76127800 | 1.20441100  | -2.46493500 |
| H  | -4.34989200 | -1.32364900 | -2.11818800 | H         | -1.43950500 | -0.39812900 | -3.04532200 |
| Cl | -1.66276500 | 2.71118900  | -0.54037900 | O         | 5.65871600  | -2.20713900 | -0.01759100 |

|    |             |             |             |
|----|-------------|-------------|-------------|
| Ru | -1.83164100 | 0.15044900  | -0.23257300 |
| C  | -2.50822000 | -1.76364600 | 0.75259100  |
| C  | -3.30200700 | -1.46554600 | -0.40867400 |
| C  | -2.71859400 | -0.70665300 | 1.71927000  |
| C  | -3.95033900 | -0.19376500 | -0.18448400 |
| C  | -3.61179700 | 0.24464000  | 1.16475400  |
| C  | -4.98878200 | 0.43520600  | -1.06441600 |
| H  | -5.99261100 | 0.08576700  | -0.78535600 |
| H  | -4.97996400 | 1.52425700  | -0.97548800 |
| H  | -4.83056400 | 0.18124000  | -2.11604800 |
| C  | -4.18300000 | 1.45067200  | 1.84576700  |
| H  | -4.21927400 | 2.30748000  | 1.16921300  |
| H  | -5.20619600 | 1.24418500  | 2.18647800  |
| H  | -3.59538000 | 1.73926700  | 2.72127300  |
| C  | -2.10552700 | -0.67394100 | 3.08712800  |
| H  | -2.69265500 | -1.28818800 | 3.78266800  |
| H  | -1.08902000 | -1.07750500 | 3.07961900  |
| H  | -2.06650200 | 0.34016500  | 3.49192600  |
| C  | -1.79786200 | -3.05259900 | 1.04754000  |
| H  | -2.42547000 | -3.68818000 | 1.68678900  |
| H  | -1.58326700 | -3.61904700 | 0.13976800  |
| H  | -0.85656900 | -2.89165000 | 1.58104500  |
| C  | -3.55041700 | -2.36197200 | -1.58490100 |
| H  | -2.76118100 | -3.10634900 | -1.70903200 |
| H  | -4.49492100 | -2.90557800 | -1.44855500 |
| H  | -3.63354800 | -1.79432900 | -2.51559600 |
| Cl | -1.87921400 | 2.63523500  | -0.52418100 |
| H  | 3.65925300  | -1.02163600 | 2.43937800  |
| H  | 3.40078700  | -2.49118400 | 1.48110300  |
| H  | 3.17034400  | -2.24295700 | -1.11488100 |
| H  | 3.28350500  | -0.63232300 | -1.83568100 |
| H  | 1.52529300  | -0.24466500 | 1.58931000  |
| H  | 1.31724200  | -1.67077100 | 0.61075700  |
| Si | 2.89549900  | 2.07039500  | 0.07085200  |
| C  | 4.04711200  | 3.20646800  | -0.87251000 |
| H  | 3.53696800  | 4.13579200  | -1.15327900 |
| H  | 4.91798300  | 3.48295700  | -0.26673400 |
| H  | 4.41421500  | 2.73717100  | -1.79190600 |
| C  | 2.29704500  | 2.93262100  | 1.62718700  |
| H  | 1.74710500  | 3.84842600  | 1.37803600  |
| H  | 1.62902800  | 2.29843700  | 2.22080000  |

|   |            |            |             |
|---|------------|------------|-------------|
| H | 3.13735800 | 3.21927600 | 2.27075900  |
| C | 1.47679200 | 1.45201400 | -0.99490200 |
| H | 0.02639200 | 0.67584300 | 0.35007300  |
| H | 1.88738200 | 1.18842900 | -1.97693100 |
| H | 0.74135000 | 2.24315100 | -1.16687800 |

### TSB8-B10

|    |             |             |             |
|----|-------------|-------------|-------------|
| C  | 2.22253200  | 1.45743000  | 1.28792300  |
| C  | 2.53920800  | 0.38466200  | 0.21247100  |
| C  | 2.98552600  | 0.99586400  | -1.15911000 |
| C  | 2.86389600  | 2.53594300  | -1.36545700 |
| C  | 2.83168400  | 2.81227400  | 0.96755500  |
| H  | 1.14018900  | 1.60476400  | 1.35801500  |
| H  | 2.57342900  | 1.07823500  | 2.25285900  |
| O  | 2.30544800  | 3.26105500  | -0.27801400 |
| C  | 1.29864000  | -0.55820600 | 0.04384800  |
| C  | 0.06937400  | 0.10873300  | -0.45939800 |
| H  | 3.93306200  | 2.77179100  | 0.93175500  |
| H  | 2.54713100  | 3.55566500  | 1.71831100  |
| C  | -0.32860000 | 0.41513800  | -1.80329400 |
| C  | -0.13353500 | -0.56324000 | -2.94393200 |
| H  | 0.05083100  | -1.58327800 | -2.59823000 |
| H  | -1.00545900 | -0.56708800 | -3.60561400 |
| H  | 0.72912600  | -0.25213100 | -3.54616700 |
| C  | -1.17427600 | 1.53478800  | -1.92625000 |
| H  | -0.95965100 | 2.45616700  | -1.39970700 |
| H  | -1.78932400 | 1.62411800  | -2.82036100 |
| H  | 2.45118700  | 0.49016100  | -1.96718700 |
| H  | 4.03800600  | 0.74028700  | -1.28507800 |
| H  | 2.22454800  | 2.75578700  | -2.22490400 |
| H  | 1.58568300  | -1.35203500 | -0.65927900 |
| H  | 1.11282600  | -1.01584100 | 1.01969200  |
| Ru | -1.76832900 | 0.32598200  | -0.08453000 |
| O  | 3.58489900  | -0.42079200 | 0.76907300  |
| Si | 4.69275800  | -1.55505200 | 0.19329900  |
| C  | 5.10191300  | -2.58142500 | 1.70886700  |
| H  | 4.21107500  | -3.07823200 | 2.10938500  |
| H  | 5.83614100  | -3.35963700 | 1.46887400  |
| H  | 5.52597900  | -1.96301600 | 2.50791800  |
| C  | 6.25606700  | -0.71147900 | -0.42521500 |
| H  | 6.11847300  | -0.21579200 | -1.39261100 |
| H  | 6.61632100  | 0.04001700  | 0.28675300  |

|            |             |             |             |    |             |             |             |
|------------|-------------|-------------|-------------|----|-------------|-------------|-------------|
| H          | 7.05704700  | -1.45063800 | -0.55315300 | C  | 1.30283700  | -0.60182400 | 0.04271300  |
| C          | 4.00674500  | -2.65799300 | -1.16670500 | C  | 0.04833100  | -0.12953800 | -0.59905300 |
| H          | 3.13889300  | -3.23683800 | -0.83251300 | H  | 3.90790100  | 2.62430200  | 1.08136900  |
| H          | 3.71813600  | -2.09826200 | -2.06303900 | H  | 2.56010100  | 3.65992900  | 1.57770600  |
| H          | 4.77867900  | -3.37614700 | -1.47148000 | C  | -0.36916900 | -0.20534100 | -1.96745700 |
| C          | -3.93663000 | -0.68523500 | -0.38227500 | C  | -0.12619100 | -1.44279600 | -2.80789800 |
| C          | -3.97646400 | -0.05007600 | 0.86422800  | H  | 0.13423300  | -2.31746200 | -2.20662400 |
| C          | -2.82123100 | -1.62544000 | -0.36208900 | H  | -1.00377300 | -1.68045600 | -3.41698200 |
| C          | -2.88584500 | -0.58432000 | 1.69334300  | H  | 0.70550300  | -1.25113700 | -3.49731200 |
| C          | -2.24993500 | -1.62865800 | 0.96724700  | C  | -1.27017600 | 0.80073200  | -2.37396200 |
| C          | -4.95527000 | 0.98012600  | 1.33295900  | H  | -1.09267100 | 1.84188300  | -2.13511100 |
| H          | -5.56382300 | 0.58401700  | 2.15590700  | H  | -1.89375500 | 0.61023500  | -3.24640000 |
| H          | -4.43680200 | 1.87160000  | 1.70054600  | H  | 2.59086600  | 0.40747800  | -2.02831000 |
| H          | -5.63435300 | 1.28541700  | 0.53293300  | H  | 3.95340200  | 1.17029600  | -1.20754500 |
| C          | -2.68362300 | -0.23551300 | 3.13686300  | H  | 1.17541200  | 2.41846600  | -1.43515800 |
| H          | -3.46126300 | -0.69524200 | 3.76152600  | H  | 1.71556700  | -1.43604400 | -0.54058700 |
| H          | -1.71497500 | -0.58531500 | 3.50364900  | H  | 1.09972200  | -0.95831700 | 1.05675400  |
| H          | -2.73052600 | 0.84641200  | 3.28744000  | Ru | -1.79359400 | 0.13783500  | -0.26110600 |
| C          | -1.25401900 | -2.61633200 | 1.49948200  | O  | 3.52829900  | -0.17589700 | 0.83118900  |
| H          | -1.77170800 | -3.49310200 | 1.91111300  | Si | 4.81597200  | -1.16541600 | 0.37561600  |
| H          | -0.57924700 | -2.97504500 | 0.71820600  | C  | 5.33261800  | -1.97168400 | 1.98756300  |
| H          | -0.64724300 | -2.18857300 | 2.30161300  | H  | 4.52678600  | -2.58234400 | 2.41000200  |
| C          | -2.56604500 | -2.65331500 | -1.42616500 | H  | 6.20151800  | -2.62355400 | 1.83843300  |
| H          | -3.27450500 | -3.48615000 | -1.31946600 | H  | 5.60803000  | -1.22079600 | 2.73685300  |
| H          | -2.69796200 | -2.24344500 | -2.43095400 | C  | 6.24998200  | -0.15430800 | -0.30120000 |
| H          | -1.55820200 | -3.07048600 | -1.35745600 | H  | 6.07023700  | 0.21065900  | -1.31821400 |
| C          | -4.87350900 | -0.49841000 | -1.53954100 | H  | 6.46220300  | 0.71356600  | 0.33356300  |
| H          | -5.64280900 | -1.28223100 | -1.54603800 | H  | 7.16044600  | -0.76602200 | -0.33325300 |
| H          | -5.38342500 | 0.46709100  | -1.49642000 | C  | 4.33102000  | -2.47362000 | -0.88444000 |
| H          | -4.34648600 | -0.55657500 | -2.49631200 | H  | 3.53482900  | -3.13069100 | -0.51801000 |
| Cl         | -1.89717400 | 2.56051700  | 0.99211700  | H  | 4.00337700  | -2.03856500 | -1.83511600 |
| H          | 3.86476400  | 2.93973700  | -1.58758700 | H  | 5.19929000  | -3.10799300 | -1.10445800 |
| <b>B10</b> |             |             |             | C  | -3.99724300 | -0.82556200 | -0.19800400 |
| C          | 1.99414400  | 1.62127800  | 1.10127000  | C  | -3.93104000 | 0.05946600  | 0.88562000  |
| C          | 2.43890500  | 0.46986700  | 0.17099300  | C  | -2.90530800 | -1.78021600 | -0.05226800 |
| C          | 2.86453400  | 1.06851100  | -1.19896100 | C  | -2.80060800 | -0.32848900 | 1.73938000  |
| C          | 2.27426500  | 2.46026100  | -1.42196700 | C  | -2.24211900 | -1.52494600 | 1.20981400  |
| C          | 2.85138200  | 2.86292700  | 0.88425800  | C  | -4.85350000 | 1.19701700  | 1.19105200  |
| H          | 0.94379400  | 1.87068100  | 0.91754700  | H  | -5.47338800 | 0.95908600  | 2.06543200  |
| H          | 2.07882400  | 1.28423800  | 2.13936000  | H  | -4.29082700 | 2.10698500  | 1.41883900  |
| O          | 2.72180200  | 3.39931400  | -0.44152500 | H  | -5.52427900 | 1.41209900  | 0.35542200  |

|                  |             |             |             |    |             |             |             |
|------------------|-------------|-------------|-------------|----|-------------|-------------|-------------|
| C                | -2.48576900 | 0.30315000  | 3.06218700  | H  | 0.49642000  | -1.20649600 | 0.72112000  |
| H                | -3.20335700 | -0.01583500 | 3.83018600  | H  | 1.52288500  | 1.60147400  | 0.82352500  |
| H                | -1.48618000 | 0.02743700  | 3.40877900  | H  | 1.02028000  | 1.24949700  | -0.83223100 |
| H                | -2.53233900 | 1.39383500  | 2.99877800  | Ru | -1.90321900 | -0.20339100 | 0.15042400  |
| C                | -1.24004000 | -2.41659500 | 1.88209400  | O  | 3.61386700  | 0.89241300  | -0.23171700 |
| H                | -1.75288500 | -3.14047100 | 2.52951900  | Si | 5.29914900  | 0.83966900  | -0.13020400 |
| H                | -0.64955000 | -2.98938400 | 1.16233400  | C  | 5.81923500  | 2.51345800  | -0.79184700 |
| H                | -0.55049700 | -1.84834300 | 2.51182000  | H  | 5.40326700  | 3.32883300  | -0.18934800 |
| C                | -2.74629400 | -3.01231100 | -0.89558900 | H  | 6.91064400  | 2.61671700  | -0.77937400 |
| H                | -3.45650700 | -3.78475600 | -0.57077800 | H  | 5.48440400  | 2.65856000  | -1.82511000 |
| H                | -2.94768400 | -2.81250300 | -1.95165000 | C  | 6.03530100  | -0.53513900 | -1.17702500 |
| H                | -1.74302600 | -3.43754700 | -0.81556200 | H  | 5.73608700  | -1.53204900 | -0.83496500 |
| C                | -5.00953900 | -0.84848100 | -1.30535500 | H  | 5.75719600  | -0.44275700 | -2.23276100 |
| H                | -5.78839300 | -1.59711600 | -1.10724400 | H  | 7.13069000  | -0.49314000 | -1.12488000 |
| H                | -5.50422800 | 0.11904500  | -1.42166400 | C  | 5.86822200  | 0.65294000  | 1.65162500  |
| H                | -4.55136200 | -1.10694400 | -2.26453700 | H  | 5.36448300  | 1.36878500  | 2.31112300  |
| Cl               | -1.85616500 | 2.57988300  | 0.18712300  | H  | 5.69684100  | -0.35161300 | 2.05296100  |
| H                | 2.59508400  | 2.85682300  | -2.39128700 | H  | 6.94589600  | 0.84828000  | 1.72036500  |
| <b>TSB10-B11</b> |             |             |             | C  | -4.09449800 | 0.46707000  | -0.17038100 |
| C                | 2.42728200  | -0.98955500 | -1.29524000 | C  | -3.68195000 | -0.22141000 | -1.34740000 |
| C                | 2.56380300  | -0.03977200 | -0.06028100 | C  | -3.20780500 | 1.59374000  | -0.00196000 |
| C                | 2.70270300  | -0.90565400 | 1.21825400  | C  | -2.55867700 | 0.47004800  | -1.93838200 |
| C                | 1.64445100  | -1.96089800 | 1.12544100  | C  | -2.27890300 | 1.61003900  | -1.11226300 |
| C                | 2.64872300  | -2.45965700 | -0.94966700 | C  | -4.35281400 | -1.41882800 | -1.94900300 |
| H                | 1.43223200  | -0.88467000 | -1.73828900 | H  | -5.01051500 | -1.10635300 | -2.77174100 |
| H                | 3.15169100  | -0.69489600 | -2.05864100 | H  | -3.62421900 | -2.12652300 | -2.35018700 |
| O                | 1.79537600  | -2.87344500 | 0.15178800  | H  | -4.96566100 | -1.95099400 | -1.21784500 |
| C                | 1.26920800  | 0.79364800  | 0.12998900  | C  | -1.94951200 | 0.15437300  | -3.27446700 |
| C                | 0.11197500  | -0.03457600 | 0.65891700  | H  | -2.50953400 | 0.63122600  | -4.09179600 |
| H                | 3.68743000  | -2.65832800 | -0.66257800 | H  | -0.91527300 | 0.50393100  | -3.34258000 |
| H                | 2.38645800  | -3.11698400 | -1.77974800 | H  | -1.94888000 | -0.92203500 | -3.46927100 |
| C                | -0.62847300 | 0.31744100  | 1.84841500  | C  | -1.33279500 | 2.72808900  | -1.44357100 |
| C                | -0.52552500 | 1.67813400  | 2.50254200  | H  | -1.85660500 | 3.52401100  | -1.99066100 |
| H                | -0.30696300 | 2.48310900  | 1.79636100  | H  | -0.90139200 | 3.18078800  | -0.54638700 |
| H                | -1.45014900 | 1.92548100  | 3.03066100  | H  | -0.50965700 | 2.38875400  | -2.07829000 |
| H                | 0.28113400  | 1.66794400  | 3.24883600  | C  | -3.41203200 | 2.70197200  | 0.99050200  |
| C                | -1.56805200 | -0.64498400 | 2.30297900  | H  | -4.19169300 | 3.38971300  | 0.63474200  |
| H                | -1.34105300 | -1.70605400 | 2.28295900  | H  | -3.73562200 | 2.32427600  | 1.96490700  |
| H                | -2.27843700 | -0.33821800 | 3.06927600  | H  | -2.50431100 | 3.29015000  | 1.13946900  |
| H                | 2.58243300  | -0.30192000 | 2.12029500  | C  | -5.29717900 | 0.16423900  | 0.67663400  |
| H                | 3.68227400  | -1.39754200 | 1.25802000  | H  | -6.18390900 | 0.70331700  | 0.31356600  |

|    |             |             |             |
|----|-------------|-------------|-------------|
| H  | -5.53975000 | -0.90208800 | 0.67044100  |
| H  | -5.14172700 | 0.46160900  | 1.71786200  |
| Cl | -1.79123400 | -2.71260800 | -0.09651900 |
| H  | 1.20631600  | -2.39142700 | 2.02406600  |

**B11**

|    |             |             |             |
|----|-------------|-------------|-------------|
| C  | 3.27153100  | 1.54804700  | 1.24860100  |
| C  | 2.94706500  | 0.38280700  | 0.25993700  |
| C  | 3.11373700  | 0.90571200  | -1.18326800 |
| C  | 2.00593300  | 1.96348600  | -1.20579400 |
| C  | 3.39648600  | 2.89839800  | 0.53011100  |
| H  | 2.49939200  | 1.59962600  | 2.02391800  |
| H  | 4.21944000  | 1.34296900  | 1.75450600  |
| O  | 2.37559500  | 3.12478900  | -0.44778500 |
| C  | 1.43096800  | 0.07446900  | 0.27106700  |
| C  | 0.77858800  | 1.25600000  | -0.49635900 |
| H  | 4.38499700  | 2.97371800  | 0.05297400  |
| H  | 3.32195400  | 3.72548100  | 1.24274600  |
| C  | -0.33556400 | 0.91322800  | -1.47075800 |
| C  | -0.04088800 | -0.08914200 | -2.56098000 |
| H  | 0.35162400  | -1.03559500 | -2.18170300 |
| H  | -0.92738100 | -0.29330200 | -3.16379300 |
| H  | 0.72332300  | 0.32485400  | -3.23400200 |
| C  | -1.44706800 | 1.71755800  | -1.55350300 |
| H  | -1.52647700 | 2.61764900  | -0.95183200 |
| H  | -2.13138000 | 1.62584700  | -2.39238600 |
| H  | 2.89652200  | 0.10773600  | -1.89954700 |
| H  | 4.10098000  | 1.31637100  | -1.41205100 |
| H  | 0.38093900  | 1.98662000  | 0.20987100  |
| H  | 1.28247600  | -0.87708500 | -0.24760800 |
| H  | 1.04119600  | -0.03356700 | 1.28718400  |
| Ru | -2.24321500 | 0.21952800  | 0.11615700  |
| O  | 3.66016100  | -0.79757100 | 0.59637100  |
| Si | 5.23233300  | -1.30001600 | 0.25155700  |
| C  | 5.44561100  | -2.82098300 | 1.32473800  |
| H  | 4.71657400  | -3.59827200 | 1.06888000  |
| H  | 6.44532100  | -3.25405600 | 1.20161300  |
| H  | 5.31683000  | -2.58182400 | 2.38639900  |
| C  | 6.52041200  | -0.00520900 | 0.69797000  |
| H  | 6.40198300  | 0.92153600  | 0.12530400  |
| H  | 6.49738300  | 0.25086100  | 1.76302800  |
| H  | 7.52352500  | -0.39230500 | 0.47829900  |

|    |             |             |             |
|----|-------------|-------------|-------------|
| C  | 5.43050000  | -1.76118500 | -1.56121800 |
| H  | 4.64163800  | -2.44442600 | -1.89603100 |
| H  | 5.42084500  | -0.88676800 | -2.22064000 |
| H  | 6.39050000  | -2.27069700 | -1.71315600 |
| C  | -4.28792000 | -0.31970100 | -0.17603900 |
| C  | -3.88675700 | -0.77713500 | 1.14341100  |
| C  | -3.51045200 | -1.04586800 | -1.15841700 |
| C  | -2.82946500 | -1.72471100 | 0.96412600  |
| C  | -2.59524200 | -1.89632500 | -0.45624100 |
| C  | -4.53142400 | -0.38832000 | 2.43933200  |
| H  | -5.40428100 | -1.02474700 | 2.63763700  |
| H  | -3.84348800 | -0.49805900 | 3.28138500  |
| H  | -4.87388000 | 0.64912400  | 2.42209000  |
| C  | -2.10151500 | -2.45670600 | 2.04977900  |
| H  | -2.56047900 | -3.43877200 | 2.22749400  |
| H  | -1.05472400 | -2.62890700 | 1.78312400  |
| H  | -2.12489100 | -1.90386800 | 2.99220300  |
| C  | -1.68359800 | -2.92500700 | -1.05662400 |
| H  | -2.17515300 | -3.90742900 | -1.06145500 |
| H  | -1.42259700 | -2.68639500 | -2.08928800 |
| H  | -0.75577900 | -3.03271500 | -0.48680300 |
| C  | -3.74006500 | -0.99645400 | -2.63948300 |
| H  | -4.60982700 | -1.61219400 | -2.90565000 |
| H  | -3.94576400 | 0.02029100  | -2.98688200 |
| H  | -2.88505700 | -1.38133500 | -3.19987600 |
| C  | -5.43156100 | 0.60097200  | -0.47596600 |
| H  | -6.36922700 | 0.03387300  | -0.56108300 |
| H  | -5.56677600 | 1.34515700  | 0.31340500  |
| H  | -5.28121000 | 1.13181500  | -1.42007000 |
| Cl | -1.95324600 | 2.06390100  | 1.73832400  |
| H  | 1.75301200  | 2.32212400  | -2.20764100 |

**TSB11-B12**

|   |             |             |            |
|---|-------------|-------------|------------|
| C | 1.45815200  | 1.40681500  | 1.79787800 |
| H | 2.11977800  | 1.18534100  | 2.63091400 |
| H | 1.56704500  | 2.38136000  | 1.33367900 |
| C | 0.33148800  | 0.64433100  | 1.58868800 |
| C | -0.00951300 | -0.47538300 | 2.54274600 |
| H | -0.75006400 | -0.11474200 | 3.27069300 |
| H | -0.44818100 | -1.34631700 | 2.05037600 |
| H | 0.86963700  | -0.79817300 | 3.10348100 |
| C | -0.75804400 | 1.14977500  | 0.65676000 |

|   |             |             |             |            |             |             |             |
|---|-------------|-------------|-------------|------------|-------------|-------------|-------------|
| C | -1.48438900 | 0.08719900  | -0.20860200 | Ru         | 2.18420200  | 0.13927900  | -0.06521000 |
| C | -2.99340600 | 0.41991300  | -0.09753800 | Cl         | 2.15763400  | 2.30647500  | -1.29826900 |
| O | -3.72472600 | -0.75197000 | -0.42351300 | H          | -1.34495900 | -0.92172600 | 0.18944100  |
| C | -3.10133400 | 0.87264900  | 1.36911200  | H          | -1.14336600 | 0.08300100  | -1.24817100 |
| C | -1.93756100 | 1.86340200  | 1.43200000  | Si         | -5.36560200 | -1.12180700 | -0.53366300 |
| C | -3.07479800 | 3.02160200  | -0.40523900 | C          | -5.99976800 | -0.80453300 | -2.27493300 |
| C | -3.37329700 | 1.61582300  | -1.00404900 | H          | -7.01733300 | -1.19883500 | -2.38898900 |
| H | -1.64777300 | 2.14545900  | 2.44813600  | H          | -6.03399700 | 0.26300700  | -2.51898100 |
| H | -4.05576900 | 1.34056700  | 1.62618800  | H          | -5.37157000 | -1.29666800 | -3.02625600 |
| H | -2.93140300 | 0.02227400  | 2.03764800  | C          | -6.42142700 | -0.17494800 | 0.69992600  |
| H | -4.02613200 | 3.51754100  | -0.17366500 | H          | -6.09261900 | -0.33153000 | 1.73281400  |
| H | -2.57050000 | 3.63916000  | -1.15681600 | H          | -6.43477300 | 0.90335000  | 0.50723400  |
| H | -4.44925600 | 1.57166100  | -1.19598000 | H          | -7.45923900 | -0.52600800 | 0.63296800  |
| H | -2.87729300 | 1.50161700  | -1.97310000 | C          | -5.43876800 | -2.95857900 | -0.15970900 |
| H | -0.31061500 | 1.91762200  | 0.02250700  | H          | -6.46107400 | -3.34274000 | -0.25887900 |
| O | -2.27250400 | 3.08749900  | 0.78724400  | H          | -4.80305600 | -3.53421700 | -0.84210600 |
| C | 2.62143000  | -1.79021600 | -1.04472800 | H          | -5.10403300 | -3.16937000 | 0.86246300  |
| C | 2.54378100  | -2.02101900 | 0.37784300  | <b>B12</b> |             |             |             |
| C | 3.53810600  | -1.19787500 | 1.00762200  | C          | -1.58893400 | -1.84651800 | 1.44207600  |
| C | 4.23388900  | -0.46203600 | -0.02777400 | H          | -2.29183400 | -1.77178600 | 2.26703400  |
| C | 3.67697600  | -0.85269900 | -1.30852200 | H          | -1.69822600 | -2.70343400 | 0.78501800  |
| C | 4.18296900  | -0.42970300 | -2.65462500 | C          | -0.42656600 | -1.10848200 | 1.45066900  |
| H | 4.53527600  | 0.60444100  | -2.64112500 | C          | -0.10495200 | -0.21169400 | 2.62325400  |
| H | 5.02026400  | -1.06538800 | -2.97250800 | H          | 0.59545500  | -0.73041600 | 3.29270200  |
| H | 3.40405000  | -0.50405900 | -3.41849900 | H          | 0.37454500  | 0.72578300  | 2.33035100  |
| C | 1.76894800  | -2.47315900 | -2.07077600 | H          | -0.99832500 | 0.01839200  | 3.20661700  |
| H | 1.70353400  | -1.89286800 | -2.99459800 | C          | 0.69159200  | -1.44981400 | 0.47564400  |
| H | 2.19174900  | -3.45455300 | -2.32544300 | C          | 1.37886100  | -0.24390200 | -0.23538800 |
| H | 0.75339700  | -2.64187800 | -1.70082000 | C          | 2.90796700  | -0.44075500 | -0.04644100 |
| C | 5.42410700  | 0.42514700  | 0.17812000  | O          | 3.53877600  | 0.83012300  | -0.11395300 |
| H | 6.34769600  | -0.17040100 | 0.18549800  | C          | 2.96492800  | -1.11439500 | 1.33680700  |
| H | 5.51496800  | 1.16604900  | -0.61971400 | C          | 1.89869300  | -2.19992600 | 1.15407500  |
| H | 5.36884100  | 0.95886700  | 1.13098800  | C          | 2.71012800  | -2.77471700 | -1.03114800 |
| C | 3.90697900  | -1.20028400 | 2.46045500  | C          | 3.48303300  | -1.44624100 | -1.06375800 |
| H | 4.70728900  | -1.92985100 | 2.64449000  | H          | 1.61575000  | -2.71281200 | 2.07661800  |
| H | 4.27665600  | -0.22423900 | 2.78542600  | H          | 3.94302700  | -1.53897300 | 1.58039100  |
| H | 3.06339400  | -1.47425600 | 3.09875900  | H          | 2.68009000  | -0.40191900 | 2.11757200  |
| C | 1.70355300  | -3.07595500 | 1.03448000  | H          | 3.29510500  | -3.57508500 | -1.49418400 |
| H | 0.71418300  | -3.15707800 | 0.57476900  | H          | 1.78251200  | -2.67648300 | -1.61228900 |
| H | 2.18773500  | -4.05702600 | 0.93479600  | H          | 4.53633100  | -1.62755400 | -0.82021500 |
| H | 1.56739500  | -2.88703400 | 2.10092100  | H          | 3.43712200  | -1.03377000 | -2.07812000 |



|    |             |             |             |
|----|-------------|-------------|-------------|
| H  | 0.25953600  | -2.12624600 | -0.26258100 |
| O  | 2.41160100  | -3.22629300 | 0.29426200  |
| C  | -2.63692500 | 1.86638900  | -0.81804400 |
| C  | -2.48492900 | 1.88128500  | 0.62295200  |
| C  | -3.46547700 | 0.99519700  | 1.17705300  |
| C  | -4.19486600 | 0.39386800  | 0.07956900  |
| C  | -3.70046400 | 0.97458900  | -1.15871900 |
| C  | -4.26918700 | 0.73453900  | -2.52450800 |
| H  | -4.63726500 | -0.28868400 | -2.63017000 |
| H  | -5.11139500 | 1.41343300  | -2.71406600 |
| H  | -3.52551000 | 0.90232900  | -3.30764800 |
| C  | -1.82454200 | 2.69069900  | -1.76943800 |
| H  | -1.86626900 | 2.29439800  | -2.78688100 |
| H  | -2.20135900 | 3.72208500  | -1.79728600 |
| H  | -0.77479000 | 2.73749500  | -1.46397900 |
| C  | -5.37782000 | -0.51728900 | 0.20979300  |
| H  | -6.30609500 | 0.06466000  | 0.29677000  |
| H  | -5.47800000 | -1.17040800 | -0.66098900 |
| H  | -5.30068300 | -1.14900000 | 1.09892100  |
| C  | -3.79422100 | 0.81235800  | 2.62824300  |
| H  | -4.64651200 | 1.44942000  | 2.90061100  |
| H  | -4.07624900 | -0.21927700 | 2.85649700  |
| H  | -2.96057800 | 1.08900700  | 3.27748400  |
| C  | -1.58333700 | 2.81199300  | 1.37900000  |
| H  | -0.61963400 | 2.94104900  | 0.87752100  |
| H  | -2.04293900 | 3.80673600  | 1.45732900  |
| H  | -1.39221300 | 2.46075200  | 2.39509400  |
| Ru | -2.15313800 | -0.18433400 | -0.13273600 |
| Cl | -1.92744300 | -1.94776300 | -1.86144100 |
| H  | 1.11389000  | 0.70655600  | 0.23588800  |
| H  | 1.10284400  | -0.17939400 | -1.29239800 |
| Si | 5.14778600  | 1.32305800  | -0.21275200 |
| C  | 5.85475800  | 1.05214900  | -1.93423600 |
| H  | 6.81929400  | 1.56668600  | -2.02957200 |
| H  | 6.02761000  | -0.00642000 | -2.15463400 |
| H  | 5.19301700  | 1.45381300  | -2.71018900 |
| C  | 6.23901100  | 0.46309700  | 1.05320000  |
| H  | 5.86286900  | 0.58995000  | 2.07430900  |
| H  | 6.33513900  | -0.61088700 | 0.85954400  |
| H  | 7.25105900  | 0.88642300  | 1.02124100  |
| C  | 5.05829300  | 3.16172700  | 0.14486700  |

|   |            |            |             |
|---|------------|------------|-------------|
| H | 6.04892600 | 3.62554900 | 0.06937400  |
| H | 4.40049600 | 3.67392800 | -0.56653300 |
| H | 4.67558700 | 3.35839000 | 1.15264300  |

### B6b

|   |             |             |             |
|---|-------------|-------------|-------------|
| C | 1.24051000  | 3.21291600  | -0.47370200 |
| H | 1.50596900  | 4.26667500  | -0.44566700 |
| H | 1.64194700  | 2.62458500  | -1.29040600 |
| C | 0.38341700  | 2.68882300  | 0.43297500  |
| C | -0.16173900 | 3.53510700  | 1.55543100  |
| H | -1.24690500 | 3.63264000  | 1.49340000  |
| H | 0.05371400  | 3.07657300  | 2.52620100  |
| H | 0.30003400  | 4.52637200  | 1.53244100  |
| C | -0.04625700 | 1.31908600  | 0.18999800  |
| C | 0.60988200  | 0.13303000  | -0.20495200 |
| C | 1.78604300  | -0.51952800 | 0.57134600  |
| O | 2.89013300  | -0.68107900 | -0.32758300 |
| C | 1.43975900  | -1.95822100 | 1.02304700  |
| C | 2.55509300  | -2.56280700 | 1.87551500  |
| C | 3.25614400  | -0.45718900 | 2.65083300  |
| C | 2.20061200  | 0.27974700  | 1.82439000  |
| H | 2.25905100  | -3.54836300 | 2.24920900  |
| H | 0.51436200  | -1.93383300 | 1.60396000  |
| H | 1.27221000  | -2.58094100 | 0.13875900  |
| H | 3.45147000  | 0.08234000  | 3.58308700  |
| H | 4.20512900  | -0.51978500 | 2.09503900  |
| H | 1.31095800  | 0.43126400  | 2.44603800  |
| H | 2.57752900  | 1.26689300  | 1.54381200  |
| H | 3.46983800  | -2.68573400 | 1.27490300  |
| O | 2.82925700  | -1.76408900 | 3.02508200  |
| C | -2.21278700 | -0.26217900 | -1.93512100 |
| C | -3.33319900 | 0.18683000  | -1.18373800 |
| C | -3.65044100 | -0.84227400 | -0.19662200 |
| C | -2.71581600 | -1.89646000 | -0.33319700 |
| C | -1.79219100 | -1.53009300 | -1.37803900 |
| C | -0.78840300 | -2.44959600 | -2.00510400 |
| H | -0.37687000 | -3.16226500 | -1.28764300 |
| H | -1.27768200 | -3.02899500 | -2.79993800 |
| H | 0.04042000  | -1.90821300 | -2.46723900 |
| C | -1.61016000 | 0.38934400  | -3.14321700 |
| H | -0.52048600 | 0.28939700  | -3.16061500 |
| H | -1.98747800 | -0.08290700 | -4.05983800 |

|                |             |             |             |    |             |             |             |
|----------------|-------------|-------------|-------------|----|-------------|-------------|-------------|
| H              | -1.85366300 | 1.45306900  | -3.19210900 | C  | 1.79354200  | 0.48808700  | 0.30958100  |
| C              | -2.71840800 | -3.20428900 | 0.40315700  | O  | 2.48811700  | -0.74489200 | 0.07164500  |
| H              | -1.70746500 | -3.60200500 | 0.52176800  | C  | 1.49039700  | 0.55050900  | 1.82043300  |
| H              | -3.16006100 | -3.10843500 | 1.39762800  | C  | 2.76434100  | 0.72076300  | 2.64872400  |
| H              | -3.30174300 | -3.95235300 | -0.14977100 | C  | 3.88038100  | 1.85734300  | 0.91838300  |
| C              | -4.85470000 | -0.81766800 | 0.69149000  | C  | 2.67927700  | 1.72032300  | -0.02012300 |
| H              | -5.76203300 | -0.99889800 | 0.10061700  | H  | 2.51680200  | 0.82776000  | 3.70956900  |
| H              | -4.80224100 | -1.58685300 | 1.46592300  | H  | 0.83081600  | 1.40051300  | 2.01940800  |
| H              | -4.95838400 | 0.15290400  | 1.18336700  | H  | 0.96737500  | -0.35457500 | 2.13468800  |
| C              | -4.16320600 | 1.40938300  | -1.42879200 | H  | 4.40326100  | 2.79898600  | 0.72109200  |
| H              | -3.63027400 | 2.14125900  | -2.04114600 | H  | 4.60194000  | 1.04175600  | 0.76618200  |
| H              | -5.09190400 | 1.14726300  | -1.95268900 | H  | 2.06490900  | 2.61726800  | 0.09216400  |
| H              | -4.43584400 | 1.88979800  | -0.48498000 | H  | 3.01190100  | 1.69247100  | -1.06138400 |
| Ru             | -1.52720300 | 0.11474200  | 0.25884600  | H  | 3.41065400  | -0.16359900 | 2.53914600  |
| Cl             | -2.75647200 | 1.55125000  | 1.88144500  | O  | 3.48020700  | 1.89956800  | 2.28488300  |
| H              | 0.64562200  | -0.13183900 | -1.25995400 | C  | -1.66879200 | -1.92743000 | -0.75312800 |
| H              | -1.13646600 | -0.64173600 | 1.60014400  | C  | -2.98986800 | -1.41311200 | -0.79052500 |
| Si             | 4.01557900  | 0.18213400  | -1.22745200 | C  | -3.40285700 | -1.14245800 | 0.58575000  |
| C              | 4.69379400  | 1.70579300  | -0.36126300 | C  | -2.32834600 | -1.45963800 | 1.44502900  |
| H              | 5.14988000  | 1.45518000  | 0.60270100  | C  | -1.23365800 | -1.92215400 | 0.63334500  |
| H              | 5.47812500  | 2.15399200  | -0.98482700 | C  | -0.02371900 | -2.63934700 | 1.15264700  |
| H              | 3.93633500  | 2.47704400  | -0.18864000 | H  | 0.15323500  | -2.41984400 | 2.20790500  |
| C              | 5.40396300  | -1.05368900 | -1.48928600 | H  | -0.19147500 | -3.72233700 | 1.07071500  |
| H              | 6.20330700  | -0.62403200 | -2.10492300 | H  | 0.88005700  | -2.39066600 | 0.59641400  |
| H              | 5.85036500  | -1.36318700 | -0.53753000 | C  | -0.89350300 | -2.49007800 | -1.90307600 |
| H              | 5.04472200  | -1.95590300 | -1.99729500 | H  | 0.18179000  | -2.40107900 | -1.73897600 |
| C              | 3.30093200  | 0.64679400  | -2.90407200 | H  | -1.11813800 | -3.55795800 | -2.02929700 |
| H              | 2.51180000  | 1.40399500  | -2.84712100 | H  | -1.13917400 | -1.98844800 | -2.84306900 |
| H              | 4.08882600  | 1.05137800  | -3.55204100 | C  | -2.32711500 | -1.38762300 | 2.94335900  |
| H              | 2.88457100  | -0.23190800 | -3.41051900 | H  | -1.34790600 | -1.09489200 | 3.33087500  |
| <b>TSB6b-E</b> |             |             |             | H  | -3.06346200 | -0.67001800 | 3.31303800  |
| C              | 0.28341900  | 3.34563200  | -2.18759600 | H  | -2.57248000 | -2.36637200 | 3.37581400  |
| H              | 0.30203400  | 4.37679400  | -2.52856200 | C  | -4.77928900 | -0.72386900 | 0.99212300  |
| H              | 0.73782500  | 2.60153000  | -2.83526700 | H  | -5.45338300 | -1.59061600 | 0.96844700  |
| C              | -0.32009100 | 3.01509300  | -1.02826800 | H  | -4.79751500 | -0.31716500 | 2.00632500  |
| C              | -0.90622400 | 4.05920300  | -0.10898300 | H  | -5.17860300 | 0.03319500  | 0.31396600  |
| H              | -1.95445000 | 3.84512500  | 0.10771800  | C  | -3.89258600 | -1.32258100 | -1.98243900 |
| H              | -0.36557500 | 4.07143400  | 0.84566800  | H  | -3.32822600 | -1.36190800 | -2.91774400 |
| H              | -0.82395700 | 5.05265400  | -0.55863900 | H  | -4.60523700 | -2.15806600 | -1.98710800 |
| C              | -0.37293900 | 1.60200800  | -0.65179100 | H  | -4.46664300 | -0.39261200 | -1.97021900 |
| C              | 0.54228100  | 0.52217700  | -0.61276400 | Ru | -1.58390500 | 0.24019700  | -0.09124200 |

|          |             |             |             |    |             |             |             |
|----------|-------------|-------------|-------------|----|-------------|-------------|-------------|
| Cl       | -3.41774300 | 1.85455500  | -0.59235100 | O  | 2.22633200  | 3.55866500  | -0.83641000 |
| H        | 0.77182000  | 0.05902700  | -1.57502000 | C  | -2.03841700 | -0.65062700 | 1.76949800  |
| H        | -1.01664900 | 1.43637800  | 0.90824900  | C  | -2.91516800 | -1.14101800 | 0.72973100  |
| Si       | 3.73412700  | -1.38668400 | -0.86688800 | C  | -3.62948600 | -0.00681600 | 0.17879600  |
| C        | 4.30092600  | -0.29523300 | -2.28940600 | C  | -3.14089000 | 1.17435600  | 0.80453600  |
| H        | 4.82201900  | 0.60970500  | -1.96208400 | C  | -2.15162800 | 0.77512000  | 1.79826300  |
| H        | 5.00417200  | -0.86682900 | -2.90892200 | C  | -1.54501300 | 1.69877100  | 2.81013500  |
| H        | 3.47055600  | 0.00271000  | -2.93929800 | H  | -1.30843800 | 2.67597000  | 2.38124600  |
| C        | 5.19076800  | -1.79230500 | 0.25169700  | H  | -2.25728100 | 1.86718900  | 3.62953500  |
| H        | 5.93004100  | -2.38704400 | -0.29955100 | H  | -0.63361500 | 1.28603700  | 3.24837100  |
| H        | 5.70552300  | -0.90197700 | 0.62702400  | C  | -1.27226300 | -1.50210400 | 2.73629000  |
| H        | 4.87639200  | -2.38726700 | 1.11705500  | H  | -0.40193600 | -0.97914500 | 3.14129300  |
| C        | 3.09639100  | -3.00074600 | -1.58667800 | H  | -1.91400500 | -1.77496800 | 3.58479500  |
| H        | 2.32208100  | -2.83819100 | -2.34386700 | H  | -0.92931100 | -2.42996700 | 2.27311100  |
| H        | 3.91871400  | -3.53872400 | -2.07492300 | C  | -3.62526200 | 2.57649900  | 0.58696700  |
| H        | 2.68635800  | -3.66474300 | -0.81784000 | H  | -2.80655900 | 3.29927000  | 0.65570600  |
| <b>E</b> |             |             |             | H  | -4.09769400 | 2.69389400  | -0.39126100 |
| C        | 0.41546700  | -3.49498400 | -0.01473300 | H  | -4.36689100 | 2.85043500  | 1.34920100  |
| H        | 0.18316900  | -4.55553800 | -0.06364100 | C  | -4.71372600 | -0.08713300 | -0.85051200 |
| H        | 0.99540100  | -3.16311100 | 0.84006400  | H  | -5.67753700 | -0.26999600 | -0.35639800 |
| C        | 0.01250600  | -2.65076900 | -0.98255400 | H  | -4.80150200 | 0.83869500  | -1.42217900 |
| C        | -0.72514900 | -3.15971100 | -2.19952400 | H  | -4.54506200 | -0.90569600 | -1.55416600 |
| H        | -1.69258300 | -2.66128500 | -2.31993500 | C  | -3.23109800 | -2.58062500 | 0.46033300  |
| H        | -0.15090500 | -2.95212400 | -3.11166700 | H  | -2.34424800 | -3.21194300 | 0.54576200  |
| H        | -0.89493100 | -4.23850800 | -2.14439100 | H  | -3.96933300 | -2.94348700 | 1.18885800  |
| C        | 0.34672000  | -1.20681000 | -0.99055300 | H  | -3.65773500 | -2.72130900 | -0.53564500 |
| C        | 0.80133400  | -0.44621500 | 0.07665800  | Ru | -1.44175500 | 0.17710300  | -0.20394400 |
| C        | 1.74382000  | 0.76323000  | -0.06810100 | Cl | -1.67011500 | 0.81477100  | -2.59314700 |
| O        | 3.00690700  | 0.42214300  | 0.53113200  | H  | 0.86247400  | -0.89802200 | 1.06368000  |
| C        | 1.23790000  | 1.97532700  | 0.73929300  | H  | 0.46062500  | -0.79582500 | -1.98876100 |
| C        | 2.12144100  | 3.20644500  | 0.54086500  | Si | 4.13458600  | -0.82752400 | 0.45579500  |
| C        | 2.80386100  | 2.49722700  | -1.59491900 | C  | 4.09910400  | -1.80132700 | -1.14919200 |
| C        | 1.96739500  | 1.21796100  | -1.52526500 | H  | 4.27391700  | -1.16531100 | -2.02350800 |
| H        | 1.69049500  | 4.07436100  | 1.05027600  | H  | 4.89623400  | -2.55570400 | -1.13054700 |
| H        | 0.21605200  | 2.21090800  | 0.41759700  | H  | 3.15335400  | -2.33313100 | -1.29500300 |
| H        | 1.19911600  | 1.71232700  | 1.80115800  | C  | 5.79486300  | 0.02720000  | 0.65022700  |
| H        | 2.86320600  | 2.85547000  | -2.62737200 | H  | 6.60714900  | -0.70751000 | 0.70802400  |
| H        | 3.82956100  | 2.30414400  | -1.24397200 | H  | 6.01266100  | 0.69314800  | -0.19234600 |
| H        | 0.99530900  | 1.40256600  | -1.99463900 | H  | 5.83067200  | 0.62792300  | 1.56641700  |
| H        | 2.46524500  | 0.42808700  | -2.09699600 | C  | 3.87503800  | -1.98375900 | 1.91481100  |
| H        | 3.12209500  | 3.02584600  | 0.96289500  | H  | 2.93487400  | -2.54031900 | 1.84157900  |

|   |            |             |            |
|---|------------|-------------|------------|
| H | 4.68647600 | -2.71955700 | 1.97382200 |
| H | 3.86245900 | -1.43002700 | 2.86083900 |

**B8'**

|   |             |             |             |
|---|-------------|-------------|-------------|
| C | 0.10277200  | -1.23954700 | -3.29387400 |
| H | 0.22983900  | -1.08357500 | -4.36248700 |
| H | -0.12555500 | -2.25102800 | -2.96777400 |
| C | 0.25393500  | -0.22541500 | -2.42323600 |
| C | 0.56495400  | 1.17807100  | -2.89399500 |
| H | -0.26739500 | 1.85641000  | -2.68217700 |
| H | 1.43367600  | 1.58797400  | -2.37592000 |
| H | 0.75287100  | 1.19546300  | -3.97139100 |
| C | 0.11721700  | -0.45208800 | -0.96107800 |
| C | -1.29524100 | -0.72259100 | -0.47715700 |
| C | -2.43167900 | 0.35340000  | -0.55254700 |
| O | -1.92861300 | 1.51950700  | 0.10153400  |
| C | -3.60923200 | -0.24276800 | 0.26479900  |
| C | -4.93716700 | 0.48499900  | 0.07016500  |
| C | -4.30435800 | 1.30748600  | -2.03109900 |
| C | -2.93278600 | 0.62620700  | -1.98771600 |
| H | -5.74546600 | -0.06667300 | 0.56089400  |
| H | -3.74432700 | -1.28540700 | -0.04599400 |
| H | -3.33666200 | -0.24834700 | 1.32600400  |
| H | -4.65810200 | 1.36752300  | -3.06534100 |
| H | -4.25159700 | 2.33605100  | -1.64237900 |
| H | -3.01966300 | -0.33605900 | -2.50359400 |
| H | -2.21251100 | 1.22762500  | -2.54603600 |
| H | -4.90454000 | 1.49011900  | 0.51383500  |
| O | -5.28887300 | 0.57458000  | -1.30938100 |
| C | 3.44439900  | 0.66815800  | -0.10691100 |
| C | 3.44633600  | -0.36827000 | -1.10293000 |
| C | 3.51235300  | -1.61919800 | -0.41186700 |
| C | 3.77483000  | -1.34362600 | 1.00154600  |
| C | 3.71837700  | 0.04465700  | 1.18653000  |
| C | 3.92237900  | 0.80463200  | 2.46472000  |
| H | 3.76265600  | 0.17561400  | 3.34389600  |
| H | 4.94552400  | 1.19942400  | 2.51977500  |
| H | 3.24479800  | 1.66056300  | 2.53474200  |
| C | 3.55183300  | 2.14669700  | -0.35831500 |
| H | 3.06627700  | 2.72769700  | 0.43097700  |
| H | 4.60584600  | 2.45551000  | -0.38665400 |
| H | 3.10228100  | 2.43505800  | -1.31137800 |

|    |             |             |             |
|----|-------------|-------------|-------------|
| C  | 4.07952700  | -2.39427300 | 2.02433500  |
| H  | 4.10818200  | -1.98055000 | 3.03561800  |
| H  | 3.32991000  | -3.19030400 | 2.00389900  |
| H  | 5.05847700  | -2.84866300 | 1.82295800  |
| C  | 3.61712100  | -2.97101100 | -1.05367200 |
| H  | 4.66653900  | -3.22916300 | -1.25242200 |
| H  | 3.19942000  | -3.74827300 | -0.40887800 |
| H  | 3.08145500  | -2.99986000 | -2.00645400 |
| C  | 3.58288600  | -0.20811600 | -2.58802900 |
| H  | 3.44179900  | 0.82692100  | -2.90283300 |
| H  | 4.59582800  | -0.50469600 | -2.89084800 |
| H  | 2.88096000  | -0.83553700 | -3.14414800 |
| Ru | 1.59927300  | -0.61770900 | 0.26291800  |
| Cl | 0.69532900  | -2.72958400 | 1.26798400  |
| H  | 0.65142800  | 0.61106500  | 1.11598800  |
| H  | 0.61599000  | -0.04809800 | 1.61712500  |
| Si | -1.99452600 | 3.18457500  | 0.27037100  |
| C  | -1.83238800 | 4.12114300  | -1.35239800 |
| H  | -1.81818500 | 5.19858800  | -1.14259600 |
| H  | -0.90119600 | 3.88174800  | -1.87639800 |
| H  | -2.66593200 | 3.93910900  | -2.03848300 |
| C  | -0.51062400 | 3.57352700  | 1.35452800  |
| H  | -0.56519400 | 3.04230500  | 2.31168600  |
| H  | 0.42828200  | 3.29143400  | 0.86533900  |
| H  | -0.45920200 | 4.64661500  | 1.57525200  |
| C  | -3.54359100 | 3.77472600  | 1.15968200  |
| H  | -4.43946500 | 3.74886000  | 0.53102900  |
| H  | -3.74509500 | 3.18878500  | 2.06328100  |
| H  | -3.40169900 | 4.81690100  | 1.47396800  |
| H  | -1.25107300 | -1.04775800 | 0.56257400  |
| H  | -1.64131600 | -1.58787400 | -1.06323500 |

**TSB5-B6'**

|   |             |            |             |
|---|-------------|------------|-------------|
| C | 0.01733100  | 1.00761600 | -0.38927600 |
| C | -0.98572800 | 0.21870100 | -0.01071500 |
| C | -2.47059800 | 0.44169100 | 0.30875800  |
| C | -2.63266700 | 0.96325300 | 1.75822600  |
| C | -3.13593500 | 1.44663500 | -0.65737000 |
| C | -4.08868800 | 1.32287300 | 2.05750800  |
| C | -4.55931800 | 1.78306100 | -0.20583300 |
| H | -4.17690800 | 1.77765600 | 3.04944000  |
| H | -4.71298400 | 0.41692600 | 2.04012000  |

|    |             |             |             |            |             |             |             |
|----|-------------|-------------|-------------|------------|-------------|-------------|-------------|
| H  | -4.98278500 | 2.56949500  | -0.83851900 | H          | -2.54918700 | 2.36707900  | -0.68892200 |
| H  | -5.20626600 | 0.89639900  | -0.28900000 | H          | -3.15118700 | 1.03623500  | -1.67120400 |
| O  | -3.18178200 | -0.79754400 | 0.27062600  | H          | 1.20209400  | -1.96444800 | 0.29707800  |
| C  | 0.13969800  | 2.40627300  | -0.81495100 | H          | -0.72146100 | -0.84754400 | 0.19057100  |
| C  | 0.54878600  | 2.70876200  | -2.06031800 | Si         | -3.32246800 | -2.08968000 | -0.81009300 |
| C  | -0.15970100 | 3.48836200  | 0.20329500  | C          | -2.06307900 | -3.41910500 | -0.38576500 |
| H  | -1.22596200 | 3.52526000  | 0.44999000  | H          | -2.30828000 | -4.35263900 | -0.90778100 |
| H  | 0.37303000  | 3.30862800  | 1.14200600  | H          | -1.05053500 | -3.13225400 | -0.68887400 |
| H  | 0.13496900  | 4.47094700  | -0.17706700 | H          | -2.05020600 | -3.63684300 | 0.68858000  |
| H  | 0.77901000  | 1.93240700  | -2.78359500 | C          | -5.05224300 | -2.74588700 | -0.49598800 |
| H  | 0.64768200  | 3.74226600  | -2.38201700 | H          | -5.20388300 | -2.98289000 | 0.56330200  |
| O  | -4.58889500 | 2.28389700  | 1.12938300  | H          | -5.81919200 | -2.01896700 | -0.78622400 |
| Ru | 1.45313600  | -0.41319900 | 0.16726000  | H          | -5.23321600 | -3.66341600 | -1.06842300 |
| C  | 3.08829700  | 1.13446000  | 0.93047400  | C          | -3.11855000 | -1.60444900 | -2.61262600 |
| C  | 3.56614600  | 0.23975300  | -0.08535000 | H          | -3.87868500 | -0.89157100 | -2.94933700 |
| C  | 2.63866100  | 0.34716600  | 2.03703300  | H          | -2.13012600 | -1.17752900 | -2.81201800 |
| C  | 3.51258700  | -1.11313700 | 0.43850400  | H          | -3.21465300 | -2.50221200 | -3.23689000 |
| C  | 2.92441900  | -1.03912200 | 1.75210000  |            |             |             |             |
| C  | 4.12273500  | -2.31464700 | -0.21731800 | <b>B6'</b> |             |             |             |
| H  | 5.21291100  | -2.30836900 | -0.08671800 | C          | 1.95637100  | 3.08212600  | -1.62701800 |
| H  | 3.73851200  | -3.24427400 | 0.20959000  | H          | 2.23502700  | 4.07560600  | -1.96845700 |
| H  | 3.91243900  | -2.32479700 | -1.28931800 | H          | 2.72282700  | 2.31672300  | -1.63490600 |
| C  | 2.77922100  | -2.16646100 | 2.73280200  | C          | 0.68672300  | 2.79958400  | -1.25729800 |
| H  | 2.76867400  | -3.13593000 | 2.23032100  | C          | -0.39545400 | 3.85565700  | -1.34705300 |
| H  | 3.61797400  | -2.16334300 | 3.44115800  | H          | -1.16191200 | 3.56189600  | -2.07177200 |
| H  | 1.85866600  | -2.07761300 | 3.31597000  | H          | -0.89740500 | 4.01413300  | -0.38761500 |
| C  | 2.08458600  | 0.86365600  | 3.33049300  | H          | 0.02753800  | 4.81123200  | -1.66880600 |
| H  | 2.89419800  | 1.02959500  | 4.05322800  | C          | 0.35343600  | 1.43238800  | -0.90880000 |
| H  | 1.55990600  | 1.81308500  | 3.19790900  | C          | -0.76779500 | 0.58618300  | -0.85416800 |
| H  | 1.38891400  | 0.14948600  | 3.77911800  | C          | -2.03571400 | 0.70567100  | 0.01263200  |
| C  | 3.16052100  | 2.62700000  | 0.85122000  | O          | -2.46179900 | -0.59182200 | 0.43637300  |
| H  | 4.20908900  | 2.94376800  | 0.92218400  | C          | -3.14633000 | 1.39297900  | -0.82358200 |
| H  | 2.77325200  | 3.00371100  | -0.09975200 | C          | -4.38263400 | 1.71202900  | 0.02040400  |
| H  | 2.61569600  | 3.10778900  | 1.66534200  | C          | -3.13893300 | 1.83074600  | 2.00747000  |
| C  | 4.20107700  | 0.64948200  | -1.37809400 | C          | -1.81937400 | 1.51899200  | 1.30186900  |
| H  | 3.75603900  | 1.56872000  | -1.76821800 | H          | -5.10581400 | 2.28658900  | -0.56730900 |
| H  | 5.27362300  | 0.83429100  | -1.22989100 | H          | -2.75628000 | 2.33044400  | -1.23008600 |
| H  | 4.09325100  | -0.12797100 | -2.13632900 | H          | -3.42124700 | 0.75958000  | -1.67438900 |
| Cl | 1.15610100  | -1.19695900 | -2.19739400 | H          | -2.96899500 | 2.48887500  | 2.86549600  |
| H  | -2.28218500 | 0.19621300  | 2.45821100  | H          | -3.59714700 | 0.90064400  | 2.37792200  |
| H  | -2.00823100 | 1.85232400  | 1.88884500  | H          | -1.31462700 | 2.45931000  | 1.05907500  |
|    |             |             |             | H          | -1.17267100 | 0.95575400  | 1.97702300  |

|    |             |             |             |
|----|-------------|-------------|-------------|
| H  | -4.87444000 | 0.78665600  | 0.35350600  |
| O  | -4.05084800 | 2.51492100  | 1.15039800  |
| C  | 1.86591700  | -0.16379300 | 1.90613000  |
| C  | 2.73047500  | 0.79057500  | 1.23699500  |
| C  | 3.52301600  | 0.08044900  | 0.29259400  |
| C  | 3.17442600  | -1.32300700 | 0.39590500  |
| C  | 2.19906700  | -1.48014600 | 1.41352300  |
| C  | 1.67352900  | -2.77511000 | 1.96411800  |
| H  | 1.65717000  | -3.56223000 | 1.20620000  |
| H  | 2.30991700  | -3.12590100 | 2.78787000  |
| H  | 0.66043400  | -2.66461400 | 2.35834400  |
| C  | 1.07124700  | 0.10579500  | 3.15064700  |
| H  | 0.19082100  | -0.53825700 | 3.22209200  |
| H  | 1.69015700  | -0.08819700 | 4.03769000  |
| H  | 0.74144300  | 1.14540700  | 3.20645100  |
| C  | 3.84970800  | -2.42044600 | -0.36887300 |
| H  | 3.25600300  | -3.33747600 | -0.37288300 |
| H  | 4.03189400  | -2.13199000 | -1.40660800 |
| H  | 4.82039100  | -2.65571700 | 0.08784800  |
| C  | 4.65432900  | 0.61054600  | -0.53953900 |
| H  | 5.61962600  | 0.28874200  | -0.12618300 |
| H  | 4.61160700  | 0.24481800  | -1.57050000 |
| H  | 4.66134500  | 1.70260700  | -0.56644300 |
| C  | 2.85609200  | 2.23612100  | 1.61622800  |
| H  | 1.89260600  | 2.66251300  | 1.90739600  |
| H  | 3.53348600  | 2.34216800  | 2.47395200  |
| H  | 3.25824700  | 2.84246400  | 0.80168900  |
| Ru | 1.20562000  | -0.16537400 | -0.27335000 |
| Cl | 1.30953800  | -1.25401500 | -2.49922800 |
| H  | 0.06050200  | -1.20801000 | -0.02440400 |
| H  | -0.97047400 | 0.03566600  | -1.77550800 |
| Si | -3.06509300 | -1.99791800 | -0.27686200 |
| C  | -2.27720900 | -3.40216700 | 0.68661700  |
| H  | -2.70888600 | -4.36751200 | 0.39575400  |
| H  | -1.19859300 | -3.45269100 | 0.50330000  |
| H  | -2.43214200 | -3.28419800 | 1.76531600  |
| C  | -2.68059700 | -2.17534700 | -2.10684800 |
| H  | -1.60537900 | -2.16545800 | -2.31331600 |
| H  | -3.07456400 | -3.13738600 | -2.45991100 |
| H  | -3.15272700 | -1.39464100 | -2.71338600 |
| C  | -4.93073600 | -2.06981200 | -0.03733800 |

|   |             |             |             |
|---|-------------|-------------|-------------|
| H | -5.30858800 | -3.05610600 | -0.33555600 |
| H | -5.21316500 | -1.91622300 | 1.01038700  |
| H | -5.46029600 | -1.32451100 | -0.64080500 |

### TSB6'-B7

|   |             |             |             |
|---|-------------|-------------|-------------|
| C | 0.21238500  | 3.37277300  | 0.47473600  |
| H | 0.06327500  | 4.35721200  | 0.91086000  |
| H | 1.21756300  | 3.10642900  | 0.16747400  |
| C | -0.82581400 | 2.52998300  | 0.27630300  |
| C | -2.23772500 | 2.94262900  | 0.63541300  |
| H | -2.84737500 | 3.07303000  | -0.26525200 |
| H | -2.73550400 | 2.19616800  | 1.26181300  |
| H | -2.23222900 | 3.89166500  | 1.17858500  |
| C | -0.56260000 | 1.26532700  | -0.38532700 |
| C | -1.24308400 | 0.32736100  | -1.21443200 |
| C | -2.47452000 | -0.54608800 | -0.88944500 |
| O | -2.36841500 | -1.79074900 | -1.58632500 |
| C | -3.75841500 | 0.21155900  | -1.31084900 |
| C | -5.02678700 | -0.50233400 | -0.83426700 |
| C | -3.91548100 | -1.54680000 | 0.94941600  |
| C | -2.57439000 | -0.90111900 | 0.60374700  |
| H | -5.90812700 | 0.11119200  | -1.04651700 |
| H | -3.74161100 | 1.21203000  | -0.87108600 |
| H | -3.78360200 | 0.33648100  | -2.39919200 |
| H | -3.99962000 | -1.70251800 | 2.02954700  |
| H | -4.00240300 | -2.52795100 | 0.45700900  |
| H | -2.45352100 | 0.00902400  | 1.20067400  |
| H | -1.76135300 | -1.58245700 | 0.86056600  |
| H | -5.15054000 | -1.46355300 | -1.35354500 |
| O | -5.01191800 | -0.71506000 | 0.57487000  |
| C | 1.38468600  | -1.20673700 | 1.22392800  |
| C | 1.91501200  | 0.12551400  | 1.43594100  |
| C | 2.90177600  | 0.36368000  | 0.44206000  |
| C | 3.04661800  | -0.86023600 | -0.33899300 |
| C | 2.14436900  | -1.82458600 | 0.15687200  |
| C | 2.01837200  | -3.25783400 | -0.27445700 |
| H | 2.33633000  | -3.40099200 | -1.31034500 |
| H | 2.64340100  | -3.90614400 | 0.35464200  |
| H | 0.98890800  | -3.61503000 | -0.18714800 |
| C | 0.51204800  | -1.95277500 | 2.19116300  |
| H | -0.04184500 | -2.75811400 | 1.70251900  |
| H | 1.13229600  | -2.41380100 | 2.97241600  |

|             |             |             |             |    |             |             |             |
|-------------|-------------|-------------|-------------|----|-------------|-------------|-------------|
| H           | -0.20516800 | -1.29729100 | 2.69047700  | C  | -1.83920800 | 0.57708100  | 0.35160200  |
| C           | 4.06311500  | -1.04821900 | -1.42330100 | O  | -2.53931300 | -0.67392700 | 0.33975000  |
| H           | 3.84161300  | -1.92214200 | -2.04071600 | C  | -2.79135900 | 1.73454800  | -0.05895500 |
| H           | 4.10704000  | -0.17570600 | -2.07977200 | C  | -3.90864500 | 1.95329100  | 0.96566800  |
| H           | 5.06059700  | -1.19233400 | -0.98714800 | C  | -2.60561700 | 1.09368500  | 2.72202800  |
| C           | 3.79674300  | 1.56104400  | 0.31285000  | C  | -1.40976200 | 0.83415100  | 1.80729300  |
| H           | 4.79932100  | 1.34329600  | 0.70527600  | H  | -4.49818600 | 2.83655700  | 0.69841600  |
| H           | 3.91576000  | 1.86241400  | -0.73246100 | H  | -2.20684100 | 2.65747500  | -0.12482200 |
| H           | 3.40636800  | 2.41757900  | 0.86837100  | H  | -3.21907800 | 1.54639700  | -1.04997200 |
| C           | 1.57588400  | 1.00802900  | 2.59995200  | H  | -2.26847800 | 1.34942900  | 3.73154800  |
| H           | 0.53558000  | 0.88837900  | 2.91337800  | H  | -3.23328100 | 0.19144200  | 2.79143800  |
| H           | 2.20666100  | 0.74943300  | 3.46114800  | H  | -0.74945400 | 1.70766000  | 1.83070700  |
| H           | 1.74055300  | 2.06519100  | 2.37890900  | H  | -0.83916200 | -0.02112100 | 2.17503500  |
| Ru          | 0.85144700  | 0.02257500  | -0.62908700 | H  | -4.58897600 | 1.09076700  | 0.99514400  |
| Cl          | 1.49276800  | 0.78198400  | -2.89714300 | O  | -3.38509000 | 2.19844900  | 2.26838700  |
| H           | -0.10879500 | -0.96506000 | -1.44449400 | C  | 1.16371100  | -1.98597200 | 0.53147400  |
| H           | -1.22298500 | 0.58951500  | -2.27580600 | C  | 1.87411300  | -1.35081700 | 1.62315300  |
| Si          | -2.43613200 | -2.31102800 | -3.19455200 | C  | 3.12833100  | -0.94027700 | 1.13310700  |
| C           | -1.25014500 | -3.76320900 | -3.25348700 | C  | 3.23645100  | -1.34936600 | -0.26355800 |
| H           | -1.29868900 | -4.27407700 | -4.22245500 | C  | 2.04098200  | -2.04023300 | -0.60848700 |
| H           | -0.21564700 | -3.43703900 | -3.09899100 | C  | 1.76981500  | -2.78667300 | -1.88197000 |
| H           | -1.48827100 | -4.50119900 | -2.47883500 | H  | 2.38327000  | -2.41355800 | -2.70521200 |
| C           | -1.93247500 | -1.00658000 | -4.44855900 | H  | 1.99668300  | -3.85332300 | -1.75387900 |
| H           | -0.91115000 | -0.64516800 | -4.28981000 | H  | 0.72192700  | -2.70891400 | -2.18306600 |
| H           | -1.97357900 | -1.44622500 | -5.45366900 | C  | -0.08994700 | -2.79059000 | 0.68468000  |
| H           | -2.60420300 | -0.14118200 | -4.45248600 | H  | -0.51720500 | -3.04947000 | -0.28483800 |
| C           | -4.17098900 | -2.91164700 | -3.60321500 | H  | 0.14984600  | -3.73044400 | 1.20137700  |
| H           | -4.17009300 | -3.42044800 | -4.57550400 | H  | -0.85469600 | -2.27144400 | 1.26176400  |
| H           | -4.54055900 | -3.62929600 | -2.86208200 | C  | 4.48386700  | -1.23808200 | -1.08454700 |
| H           | -4.89395900 | -2.09115400 | -3.66812300 | H  | 4.28674300  | -1.42358400 | -2.14346600 |
| <b>B6'b</b> |             |             |             | H  | 4.92463100  | -0.24230000 | -0.98979100 |
| C           | 0.63285400  | 4.01257800  | -0.41292300 | H  | 5.22914300  | -1.97204900 | -0.75093500 |
| H           | 0.50487400  | 5.03493300  | -0.75991900 | C  | 4.23048200  | -0.31402900 | 1.92583900  |
| H           | 1.07236700  | 3.86850100  | 0.56732500  | H  | 5.02722700  | -1.04731600 | 2.10768600  |
| C           | 0.24036000  | 2.97339700  | -1.16867900 | H  | 4.66833400  | 0.53088500  | 1.38715600  |
| C           | -0.36729400 | 3.15706000  | -2.54486800 | H  | 3.87500100  | 0.04094200  | 2.89658200  |
| H           | 0.21033100  | 2.60892700  | -3.29888000 | C  | 1.41668700  | -1.27420900 | 3.05091900  |
| H           | -1.39236100 | 2.77302200  | -2.58379700 | H  | 0.35214400  | -1.49635600 | 3.14744600  |
| H           | -0.37983100 | 4.21406800  | -2.82537700 | H  | 1.95637800  | -2.01180300 | 3.65990600  |
| C           | 0.28855700  | 1.60450700  | -0.66776500 | H  | 1.60218000  | -0.29180200 | 3.49462700  |
| C           | -0.64614500 | 0.54772500  | -0.63356700 | Ru | 1.51062100  | 0.20980900  | -0.26101800 |

|                  |             |             |             |    |             |             |             |
|------------------|-------------|-------------|-------------|----|-------------|-------------|-------------|
| Cl               | 3.30104500  | 1.93786100  | -0.44047500 | O  | -3.41358100 | 2.43765800  | 2.00994000  |
| H                | 1.59991500  | 0.13060100  | -1.82135300 | C  | 1.38454400  | -2.06270800 | 0.15727300  |
| H                | -0.92094300 | 0.07649500  | -1.57803000 | C  | 1.83964800  | -1.52330300 | 1.43198500  |
| Si               | -3.51280100 | -1.51752900 | -0.75402600 | C  | 3.10787100  | -0.94042000 | 1.22762800  |
| C                | -3.77476100 | -3.17677700 | 0.08173500  | C  | 3.46629900  | -1.10600200 | -0.17422000 |
| H                | -4.48575900 | -3.78587100 | -0.48935600 | C  | 2.42250900  | -1.85491700 | -0.80694400 |
| H                | -2.84595200 | -3.74904200 | 0.16962400  | C  | 2.43597400  | -2.38289300 | -2.21089600 |
| H                | -4.18646600 | -3.05154800 | 1.08985300  | H  | 3.03407400  | -1.75304600 | -2.87343200 |
| C                | -2.70859100 | -1.75332300 | -2.43884400 | H  | 2.86939100  | -3.39137700 | -2.22882100 |
| H                | -1.72275400 | -2.22543900 | -2.37096700 | H  | 1.42774600  | -2.45180800 | -2.62691900 |
| H                | -3.34259200 | -2.40607700 | -3.05278300 | C  | 0.18639600  | -2.94244700 | -0.01987000 |
| H                | -2.59680700 | -0.81024600 | -2.98538500 | H  | -0.11489500 | -3.00533300 | -1.06825500 |
| C                | -5.20130800 | -0.73166100 | -1.02914200 | H  | 0.41950700  | -3.96254100 | 0.31480900  |
| H                | -5.79550900 | -1.39190300 | -1.67436700 | H  | -0.66478400 | -2.58317700 | 0.55989900  |
| H                | -5.75837600 | -0.60895200 | -0.09417700 | C  | 4.79061300  | -0.73187500 | -0.76501600 |
| H                | -5.15040000 | 0.24236900  | -1.52626800 | H  | 4.75931800  | -0.73934300 | -1.85783900 |
| <b>TSB6'b-Z'</b> |             |             |             | H  | 5.09236700  | 0.26778500  | -0.44202300 |
| C                | 0.30080200  | 3.83551100  | -0.70649100 | H  | 5.56823300  | -1.44023100 | -0.44982200 |
| H                | 0.12031500  | 4.82197900  | -1.12702200 | C  | 3.99883400  | -0.33394600 | 2.26511700  |
| H                | 0.62907200  | 3.78142900  | 0.32401500  | H  | 4.84515500  | -1.00282700 | 2.46945400  |
| C                | 0.11336100  | 2.73301500  | -1.44589300 | H  | 4.39845600  | 0.62421700  | 1.92283500  |
| C                | -0.32631200 | 2.79349500  | -2.89399200 | H  | 3.46932300  | -0.16908400 | 3.20663900  |
| H                | 0.40891200  | 2.30203600  | -3.54321300 | C  | 1.13533600  | -1.69488100 | 2.74396400  |
| H                | -1.28036300 | 2.27398900  | -3.04107700 | H  | 0.05842200  | -1.81794100 | 2.61238900  |
| H                | -0.43779800 | 3.82994500  | -3.22509200 | H  | 1.50399800  | -2.59785500 | 3.24992100  |
| C                | 0.24194600  | 1.37505800  | -0.90203300 | H  | 1.30770200  | -0.85093200 | 3.41626300  |
| C                | -0.66911300 | 0.35804900  | -0.60065100 | Ru | 1.58843500  | 0.18827800  | -0.18540200 |
| C                | -1.89279200 | 0.55434300  | 0.32639400  | Cl | 3.06248400  | 2.19485200  | 0.14286100  |
| O                | -2.57283800 | -0.70366800 | 0.46975400  | H  | 1.52665200  | 0.50286700  | -1.76677300 |
| C                | -2.84683400 | 1.63995300  | -0.23745600 | H  | -0.77727500 | -0.49121100 | -1.26856100 |
| C                | -3.95003500 | 2.02052000  | 0.75751800  | Si | -3.61462600 | -1.59671400 | -0.52319900 |
| C                | -2.65752400 | 1.38757400  | 2.61009200  | C  | -3.58688300 | -3.32125100 | 0.21609500  |
| C                | -1.46509300 | 0.99583600  | 1.74131700  | H  | -4.36246600 | -3.94468200 | -0.24481900 |
| H                | -4.52714200 | 2.86647600  | 0.37008600  | H  | -2.62724600 | -3.82516400 | 0.06511800  |
| H                | -2.26192900 | 2.53792800  | -0.45378200 | H  | -3.78458700 | -3.29506600 | 1.29383000  |
| H                | -3.29151000 | 1.30608400  | -1.18168000 | C  | -3.06579100 | -1.64178600 | -2.32278100 |
| H                | -2.31885000 | 1.76523600  | 3.58014100  | H  | -2.07656500 | -2.09345200 | -2.45263100 |
| H                | -3.30245000 | 0.51327100  | 2.79136800  | H  | -3.77669400 | -2.24537000 | -2.90147000 |
| H                | -0.79726000 | 1.85842400  | 1.64828900  | H  | -3.04354900 | -0.64638500 | -2.77948200 |
| H                | -0.90079300 | 0.18943600  | 2.21741300  | C  | -5.39244500 | -0.98079300 | -0.47575600 |
| H                | -4.64366300 | 1.18398900  | 0.91630500  | H  | -6.02514400 | -1.69711600 | -1.01594300 |



|           |             |             |             |    |             |             |             |
|-----------|-------------|-------------|-------------|----|-------------|-------------|-------------|
| H         | -5.78155400 | -0.91510600 | 0.54622700  | C  | 5.59284400  | -0.19754000 | -0.98750700 |
| H         | -5.52983300 | -0.00634500 | -0.95541700 | H  | 5.42360200  | 0.13465900  | -2.01530600 |
| <b>Z'</b> |             |             |             | H  | 6.01395900  | 0.64144600  | -0.42780900 |
| C         | -1.90584300 | 3.94952900  | 0.18335100  | H  | 6.35144400  | -0.99160800 | -1.01580100 |
| H         | -2.27010200 | 4.96443900  | 0.32465500  | C  | 4.90857200  | -0.18580000 | 2.15495200  |
| H         | -1.41603000 | 3.48150900  | 1.03180900  | H  | 5.57535900  | -0.98140200 | 2.51498200  |
| C         | -2.04029300 | 3.32040500  | -0.99331600 | H  | 5.53503600  | 0.64162900  | 1.81191900  |
| C         | -2.66581800 | 3.99442100  | -2.19322400 | H  | 4.32355000  | 0.16562200  | 3.00976900  |
| H         | -1.96399100 | 4.01823200  | -3.03669700 | C  | 2.10175200  | -1.65226800 | 2.56108300  |
| H         | -3.54962600 | 3.44286800  | -2.53764300 | H  | 1.02268200  | -1.79107200 | 2.45209700  |
| H         | -2.96575100 | 5.02148500  | -1.96684400 | H  | 2.50586200  | -2.56474900 | 3.01997900  |
| C         | -1.49470900 | 1.96392400  | -1.25010100 | H  | 2.26856000  | -0.83117400 | 3.26430800  |
| C         | -1.72612300 | 0.77147200  | -0.67263100 | Ru | 2.52485500  | 0.35154100  | -0.01332400 |
| C         | -2.65637500 | 0.31078500  | 0.44099500  | Cl | 2.95727700  | 2.73676700  | -0.43174100 |
| O         | -2.92331200 | -1.09111900 | 0.23532200  | H  | -0.79496100 | 1.94438400  | -2.08949400 |
| C         | -3.98064600 | 1.09287300  | 0.56329400  | H  | -1.14467700 | -0.06208900 | -1.06365700 |
| C         | -4.78018000 | 0.65611600  | 1.79370500  | Si | -3.70360700 | -1.97681300 | -0.97365700 |
| C         | -2.84517200 | -0.02072800 | 2.95570600  | C  | -3.19991000 | -3.74504300 | -0.60188200 |
| C         | -1.92405500 | 0.38722300  | 1.80608300  | H  | -3.66098200 | -4.44154400 | -1.31229800 |
| H         | -5.66042100 | 1.29490500  | 1.91859400  | H  | -2.11422600 | -3.87977800 | -0.66451300 |
| H         | -3.75709300 | 2.15751400  | 0.65351200  | H  | -3.51400000 | -4.04553200 | 0.40419500  |
| H         | -4.58191400 | 0.96132200  | -0.34283200 | C  | -3.16005400 | -1.49597300 | -2.70827700 |
| H         | -2.34296600 | 0.11865800  | 3.91851400  | H  | -2.08670400 | -1.64693000 | -2.86634600 |
| H         | -3.11823300 | -1.08297900 | 2.86328600  | H  | -3.68844200 | -2.12004800 | -3.44028800 |
| H         | -1.58411000 | 1.41517600  | 1.96655500  | H  | -3.39027800 | -0.45190200 | -2.94462200 |
| H         | -1.03998000 | -0.26004400 | 1.78303500  | C  | -5.57811800 | -1.84253800 | -0.87693900 |
| H         | -5.12859600 | -0.38164000 | 1.68598900  | H  | -6.02855300 | -2.54434600 | -1.59070000 |
| O         | -4.01852300 | 0.78796500  | 2.99346300  | H  | -5.95748100 | -2.10360300 | 0.11709800  |
| C         | 2.28929200  | -1.81524200 | -0.04536800 | H  | -5.94912800 | -0.84351500 | -1.12933600 |
| C         | 2.76246400  | -1.38948800 | 1.24168000  |    |             |             |             |
| C         | 4.02588400  | -0.70110500 | 1.05915300  |    |             |             |             |
| C         | 4.33242000  | -0.70534800 | -0.35550900 |    |             |             |             |
| C         | 3.24473700  | -1.37677000 | -1.03809800 |    |             |             |             |
| C         | 3.17136600  | -1.65081400 | -2.50943200 |    |             |             |             |
| H         | 3.68949800  | -0.88060700 | -3.08721800 |    |             |             |             |
| H         | 3.64200800  | -2.61526500 | -2.74465400 |    |             |             |             |
| H         | 2.13656000  | -1.69645600 | -2.86042500 |    |             |             |             |
| C         | 1.04274800  | -2.60425900 | -0.31424100 |    |             |             |             |
| H         | 0.64608900  | -2.40029800 | -1.31280700 |    |             |             |             |
| H         | 1.24552300  | -3.68232500 | -0.25790800 |    |             |             |             |
| H         | 0.25765600  | -2.38016300 | 0.41279800  |    |             |             |             |

## **AUTHOR INFORMATION**

Corresponding Author

\*E-mail for S.B.: [siweibi@126.com](mailto:siweibi@126.com).
